# Supplementary material
Source: PubMed Central journal article supplement (PMC5876029)
Supplement: NIHMS915641-supplement-Supporting_Information.pdf [file NIHMS915641-supplement-Supporting_Information.pdf]

# Table of Contents

|                                                                        |            |
|------------------------------------------------------------------------|------------|
| <b>I. GENERAL INFORMATION.....</b>                                     | <b>S2</b>  |
| <b>II. GRAPHICAL DESCRIPTION OF PHOTOREACTION SETUPS.....</b>          | <b>S4</b>  |
| <b>III. EXPERIMENTAL PROCEDURES AND COMPOUND CHARACTERIZATION ....</b> | <b>S7</b>  |
| <b>IV. ASYMMETRIC ESIPT PHOTOCYCLOADDITION .....</b>                   | <b>S24</b> |
| <b>V. MECHANISTIC STUDIES .....</b>                                    | <b>S33</b> |
| <b>VI. X-RAY CRYSTALLOGRAPHIC DATA .....</b>                           | <b>S45</b> |
| <b>VII. SELECT SPECTRA .....</b>                                       | <b>S52</b> |

## *I. General Information*

<sup>1</sup>H NMR spectra were recorded at 400 or 500 MHz at ambient temperature with CDCl<sub>3</sub> (Cambridge Isotope Laboratories, Inc.) as the solvent unless otherwise stated. <sup>13</sup>C NMR spectra were recorded at 100 or 125 MHz at ambient temperature with CDCl<sub>3</sub> as the solvent unless otherwise stated. Chemical shifts are reported in parts per million relative to CDCl<sub>3</sub> (<sup>1</sup>H, δ 7.26; <sup>13</sup>C, δ 77.16). Data for <sup>1</sup>H NMR are reported as follows: chemical shift, integration, multiplicity (br = broad, ovrlp = overlapping, s = singlet, d = doublet, t = triplet, q = quartet, m = multiplet) and coupling constants. All <sup>13</sup>C NMR spectra were recorded with complete proton decoupling. Infrared spectra were recorded on a Nicolet Nexus 670 FT-IR spectrophotometer. High-resolution mass spectra were obtained at the Boston University Chemical Instrumentation Center using a Waters Q-TOF mass spectrometer. Melting points were recorded on a Mel-temp apparatus (Laboratory Devices). Analytical LCMS was performed on a Waters Acquity UPLC (Ultra Performance Liquid Chromatography (Waters MassLynx Version 4.1) with a Binary solvent manager, SQ mass spectrometer, Water 2996 PDA (PhotoDiode

Array) detector, and ELSD (Evaporative Light Scattering Detector). An Acquity UPLC BEH C18 1.7 $\mu$ m column was used for analytical UPLC-MS. Preparative HPLC was performed on a Gilson PLC2020 using a Waters SunFire™ Prep C18 OBD™ 5 $\mu$ m 19X50 mm column. Analytical thin layer chromatography (TLC) was performed using 0.25 mm silica gel 60-F plates (Silicycle, Inc.). Flash chromatography was performed using 200-400 mesh silica gel (Sorbent Technologies, Inc.). Preparative TLC was conducted with glass backed 250  $\mu$ m or 1000  $\mu$ m silica gel 60-F plates (Silicycle, Inc.). Preparative HPLC was conducted using a PLC 2020 Personal Purification System (Gilson, Inc.). Yields refer to chromatographically and spectroscopically pure compounds, unless otherwise stated. Photochemistry experiments were performed using a Rayonet RPR-100 photochemical reactor equipped with RPR-3500Å irradiation lamps ( $\lambda > 330$  nm,  $\lambda_{\text{max}} = 350$  nm). For the Rayonet photoflow reactor, a Rayonet RPR-100 photobox was used as light source and a Thermo Scientific™ Neslab CC65 Immersion Cooler was using as a cooling system. The PTFE Tubing (1/32"ID x 1/16"OD) (Cole-Parmer Instrument Company) twined around a 500 mL Pyrex graduated cylinder and connected to a peristaltic pump (Benchtop pump with 114DV flip top single channel pumphead, model: 120S, Waston Marlow Fluid Technology Group) using 2 conical adapter assemblies (IDEX Health & Science, P-798). Two needle adapters (IDEX Health & Science, Flangeless Ferrule Tefzel®, P-300X; Flangeless Short Nut, P-335X; Luer Adapters, P-655) were also installed to connect the reaction flask with the peristaltic pump and reaction tubing. For the purple-LED reactor, the LED strip was purchased from Amazon (Lumcrissy 12V Flexible LED Strip Lights Waterproof 3528 SMD 5M 300LED 300 Units LEDs Light Strip (Purple)). All other reactions were carried out in oven-dried glassware under an argon/nitrogen atmosphere unless otherwise noted. The Sciligence ELN Reaction Planner (Sciligence Corp.) was used for experimental procedure planning. Spectrophotometric solvents (Sigma-Aldrich®) were used whenever necessary unless or otherwise mentioned. UV quality fluorimeter cells (with range until 190 nm) were purchased from Luzchem®. Absorbance measurements were performed using a Carey 300 UV-Vis spectrophotometer. Emission spectra were recorded on a Horiba Scientific® Fluorolog 3 spectrometer (FL3-22) equipped with double-grating monochromators, dual lamp housing containing a 450-watt CW xenon lamp and a UV xenon flash lamp (FL-1040), Fluorohub/MCA/MCS electronics and R928 PMT detector. Emission and excitation spectra were corrected in all the cases for source intensity (lamp

and grating) and emission spectral response (detector and grating) by standard instrument correction provided in the instrument software. Fluorescence emission spectra were processed by FluorEssence<sup>®</sup> software. Fluorescence lifetimes were determined by time correlated single photon counting using a pulsed diode (NanoLED) emitting at 263 nm and processed using DAS6<sup>®</sup> V6.4 software. Goodness-of-fit was assessed by minimizing the reduced chi squared function and was further judged by the symmetrical distribution of the residuals. Cyclic voltammetry was performed using HPLC grade acetonitrile as the solvent on a CH instrument. HPLC grade tetrahydrofuran, methylene chloride, diethyl ether, toluene, acetonitrile, and benzene were purchased from Fisher and VWR and were purified and dried by passing through a PURE SOLV<sup>®</sup> solvent purification system (Innovative Technology, Inc.). Reagents were purchased from Sigma Aldrich, Oakwood, and Alfa Aesar and were used as received.

## ***II. GRAPHICAL DESCRIPTION OF PHOTOREACTION SETUPS***

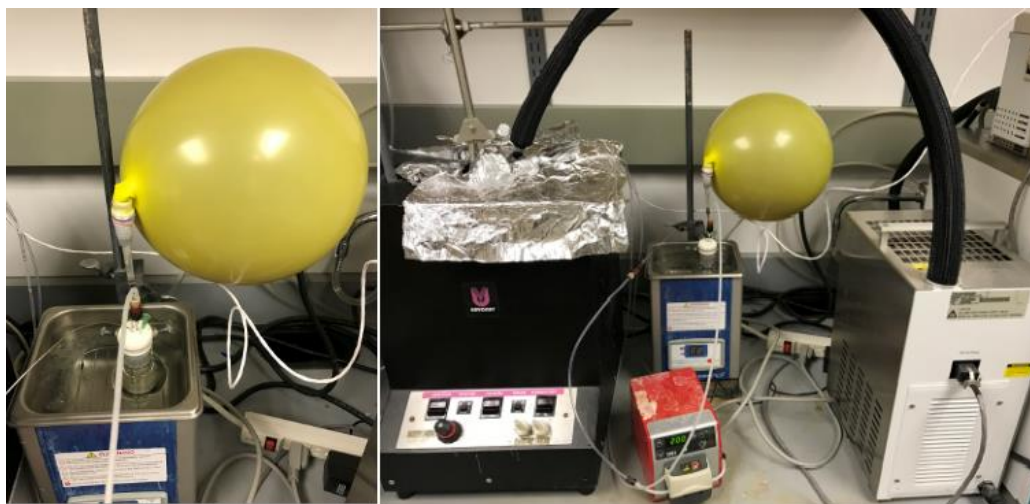

After starting materials and reaction solvents were added, the reaction flask was connected to a Rayonet photoflow reactor (reactor volume = 56 mL; flow rate = 57 mL/min) and the chiller was set to -20 °C to maintain the reaction at low temperature. The reaction flask was immersed in a sonicator with an ice-bath (an ice-bath was used to prevent solvent evaporation during degassing). The sonicator was turned on and an argon balloon with a long needle was used for

bubbling argon into the reaction to degas the reaction mixture. The duration of the degassing process was approximately 10 to 20 min.

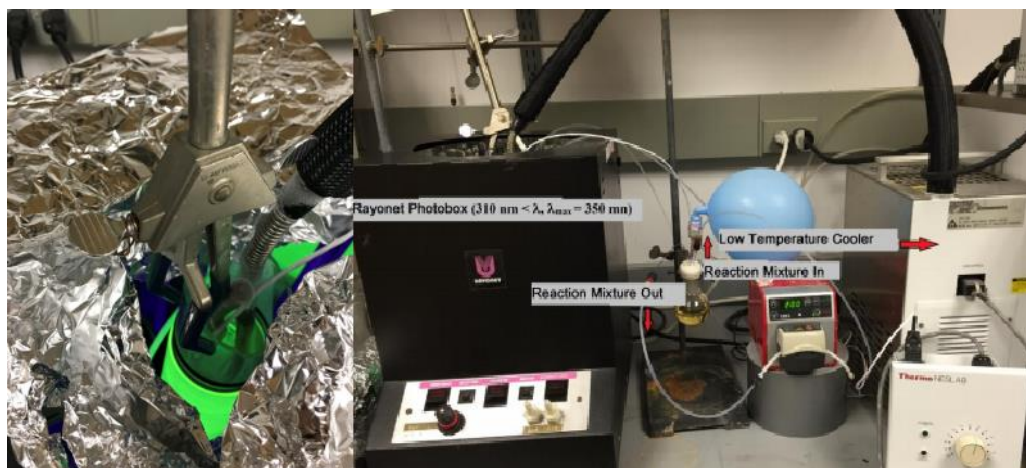

Upon completion of degassing, the UV lamps were turned on. A strong green fluorescence emission was observed. The reaction mixture was circulated for 5-6 h before the lamps were turned off.

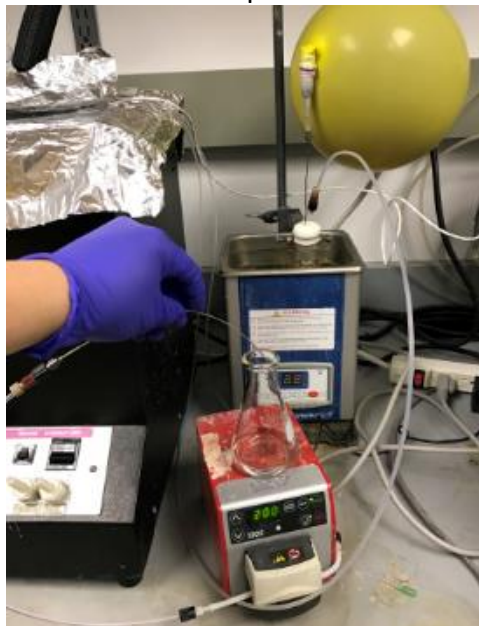

When the reaction was complete, the reaction mixture was recollected back into the reaction flask. Subsequently, an additional 100 mL of  $\text{CH}_2\text{Cl}_2$  was pumped through to rinse any residue present inside the tubing.

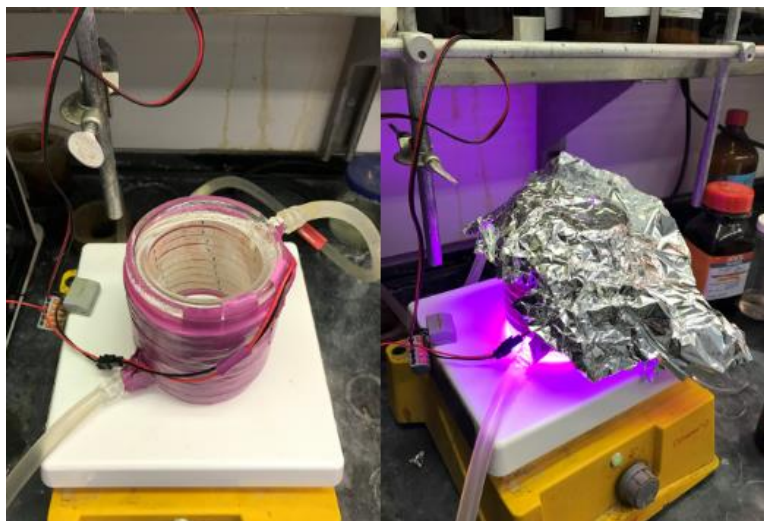

When a commercially available purple-LED (395 nm) was chosen as the light source for selective excitation of 3-HF for photocycloaddition experiments, the previously described apparatus was used. When the LED's were turned on, a water circulation system was used to maintain the reaction at room temperature.

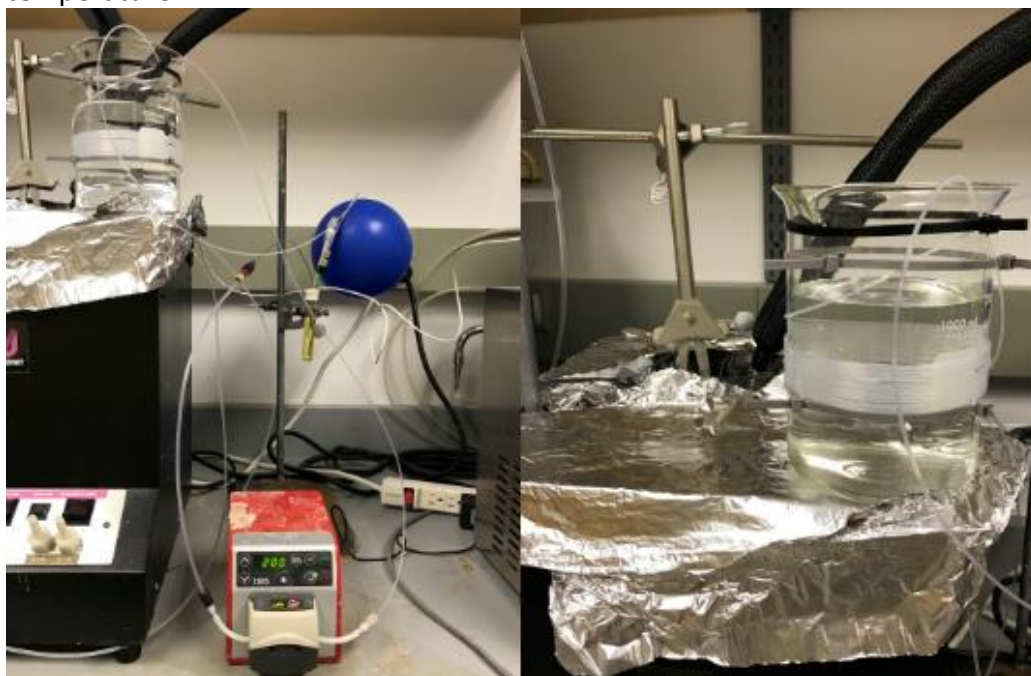

When small scale photoreactions were attempted, the photoflow reactor was switched to the setup indicated above (reaction volume = 5.4 mL; flow rate = 5 mL/min).



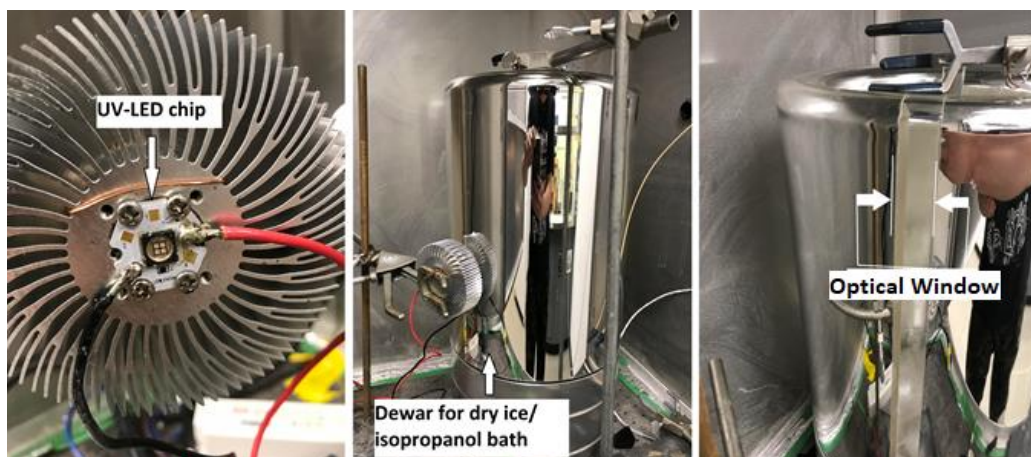

Use of a traditional UV-lamp (such as a Rayonet) will create significant heat which makes the photocycloaddition at  $-78\text{ }^{\circ}\text{C}$  very hard to maintain. Accordingly, to overcome this problem, a UV-LED ( $\lambda_{\text{max}} = 365\text{ nm}$ ) was chosen as a light source. This new photoreaction setup allows us to separate the photoreaction tube from the light source. A dewar with an optical window for light permeation allows us to run ESIPT photocycloaddition at  $-78\text{ }^{\circ}\text{C}$  very conveniently.

### III. Experimental Procedures and Compound Characterization

#### Reaction Details and Additional Experiments:

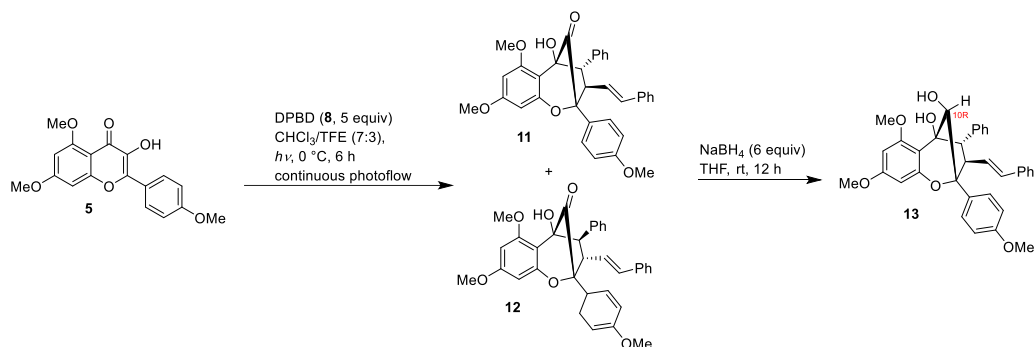

**Endo-10R-aglain 13:** A 100 mL round bottom flask was charged with 3-hydroxyflavone **5** (500 mg, 1.52 mmol, 1 equiv), DPBD **8** (1.57 g, 7.61 mmol, 5 equiv), and 75 mL of a CHCl<sub>3</sub>/TFE(7:3) mixture (0.02 M for 3-HF **5**). The flask was connected with the continuous photoflow reactor and placed into a sonicator with an ice-bath. Subsequently, the peristaltic pump was turned on to circulate the reaction mixture and argon bubbling with sonication was continued for an additional 20 min before the UV-lamp (Rayonet,  $\lambda_{\text{max}} = 350 \text{ nm}$ ) was turned on. After 6 h, the reaction mixture was collected back to the flask and concentrated *in vacuo*. Purification *via* flash chromatography using a gradient of hexanes/EtOAc (10:1 to 3:1) afforded cyclopenta[bc]benzopyrans **11-12** as a mixture of isomers which were used in next step without further purification. The isomeric ratio (**11** : **12**) was determined by <sup>1</sup>H NMR analysis to be 5:1 (545 mg, 67% yield, 1.02 mmol).

A flame-dried 100 mL flask was charged with a mixture of **11** and **12** (545 mg, 1.02 mmol, 1 equiv) and THF (6.8 mL, 0.15 M). Subsequently, NaBH<sub>4</sub> (232 mg, 6.12 mmol, 6 equiv) was added to the reaction at rt in one portion. The resulting mixture was then stirred for 12 h and was quenched with ice-cooled saturated ammonium chloride. The mixture was extracted with CH<sub>2</sub>Cl<sub>2</sub> (10 mL × 3), washed with saturated sodium bicarbonate, and dried over sodium sulfate. The filtrate was concentrated *in vacuo* and <sup>1</sup>H NMR analysis of the crude extract was obtained. NMR analysis indicated that the reduction was diastereoselective to favor the 10R-isomer (d.r.=5:1). Column chromatography purification using hexanes/EtOAc (5:1 to 3:1) afforded the aglain derivative **13** (360 mg, 44% over 2 steps) as a white solid. After recrystallization from EtOAc, trace amounts of impurities were removed and 276 mg of **13** (33%) was obtained.

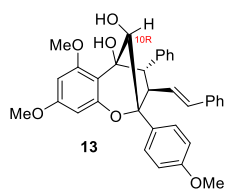

**13:**  $R_f$ : 0.41 (hexanes: EtOAc = 1:1). m.p. = 223 °C ( $\text{CH}_2\text{Cl}_2$ ).  $^1\text{H}$  NMR (500 MHz,  $\text{CDCl}_3$ )  $\delta$  7.57 (d,  $J$  = 8.9 Hz, 2H), 7.18 (m, 3H), 7.10 (m, 3H), 6.97 (m, 2H), 6.94 (d,  $J$  = 8.9 Hz, 2H), 6.90 (m, 2H), 6.28 (d,  $J$  = 2.3 Hz, 1H), 5.98 (d,  $J$  = 15.6 Hz, 1H), 5.87 (d,  $J$  = 2.3 Hz, 1H), 5.49 (dd,  $J_1$  = 15.6 Hz,  $J_2$  = 8.7 Hz, 1H), 5.42 (s, 1H, OH), 4.75 (d,  $J$  = 4.8 Hz, 1H), 3.796 (s, 3H), 3.793 (s, 3H), 3.48 (dd,  $J_1$  = 9.4 Hz,  $J_2$  = 8.7 Hz, 1H), 3.28 (d,  $J$  = 9.4 Hz, 1H), 2.36 (d,  $J$  = 4.8 Hz, 1H, OH);  $^{13}\text{C}$  NMR (125 MHz,  $\text{CDCl}_3$ )  $\delta$  160.8, 160.3, 159.2, 153.4, 137.0, 136.7, 130.1, 129.6, 129.6, 128.7, 128.2, 128.2, 127.7, 127.0, 126.9, 126.1, 113.8, 104.0, 94.0, 92.9, 86.8, 82.0, 73.3, 61.6, 55.5, 55.4, 55.3, 53.7; IR  $\nu_{\text{max}}$  (film): 3498, 2968, 1618, 1456, 1254, 1148, 1101, 831  $\text{cm}^{-1}$ . HRMS-ESI ( $m/z$ ) calculated  $[\text{M}+\text{Na}]^+$   $\text{C}_{34}\text{H}_{32}\text{O}_6\text{Na}$ , 559.2097, found 559.2091.

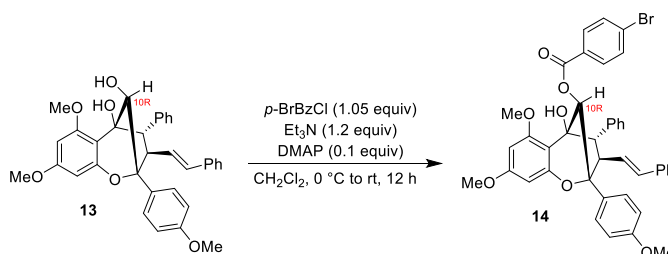

**Para-bromobenzoate 14:** To a flame dried test tube were added again **13** (120 mg, 0.22 mmol, 1 equiv),  $\text{Et}_3\text{N}$  (37  $\mu\text{L}$ , 0.27 mmol, 1.2 equiv), DMAP (2.7 mg, 0.02 mmol, 0.1 equiv), and dry  $\text{CH}_2\text{Cl}_2$  (7.5 mL, 0.1 M) at 0 °C. Subsequently, 4-bromobenzoyl chloride (51.5 mg, 0.23 mmol, 1.05 equiv) was added in one portion. The resulting mixture was allowed to warm to room temperature and was stirred for 12 h before being quenching with 10 mL of saturated  $\text{NaHCO}_3$  (aq.). The mixture was extracted with  $\text{CH}_2\text{Cl}_2$  (5 mL  $\times$  3), washed with saturated  $\text{NaCl}$  (aq.), and dried over sodium sulfate. Column chromatography purification using hexanes/EtOAc (7:1 to 4:1) afforded the *para*-bromobenzoate **14** (121 mg, 75% yield) as a white solid.

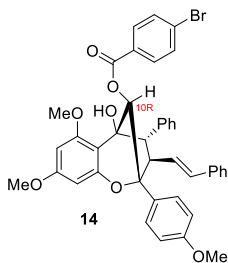

**14:**  $R_f$ : 0.61 (hexanes: EtOAc = 3:1). m.p. = 244 °C ( $\text{CH}_2\text{Cl}_2$ ).  $^1\text{H}$  NMR (500 MHz,  $\text{CDCl}_3$ )  $\delta$  7.70 (d,  $J$  = 8.7 Hz, 2H), 7.54 (d,  $J$  = 9.0 Hz, 2H), 7.42 (d,  $J$  = 8.7 Hz, 2H), 7.20 (m, 3H), 7.10 (m, 3H), 7.01 (m, 2H), 6.91 (m, 2H), 6.88 (d,  $J$  = 9.0 Hz, 2H), 6.50 (s, 1H), 6.36 (d,  $J$  = 2.4 Hz, 1H), 6.51 (d,  $J$  = 15.6 Hz, 1H), 5.86 (d,  $J$  = 2.4 Hz, 1H), 5.53 (dd,  $J_1$  = 8.4 Hz,  $J_2$  = 15.6 Hz, 1H), 5.32 (s, 1H, OH), 3.86 (s, 3H), 3.74 (s, 3H), 3.54 (dd,  $J_1$  = 9.4 Hz,  $J_2$  = 8.4 Hz, 1H), 3.49 (d,  $J$  = 9.4 Hz, 1H), 3.06 (s, 1H);  $^{13}\text{C}$  NMR (125 MHz,  $\text{CDCl}_3$ )  $\delta$  165.2, 160.7, 159.7, 159.2, 153.6, 136.9, 136.3, 131.5, 131.5, 130.5, 129.2, 129.0, 128.7, 128.7, 128.2, 128.1,



127.7, 127.5, 127.1, 127.0, 126.1, 113.8, 104.6, 93.9, 92.5, 86.5, 81.4, 72.6, 61.6, 55.5, 55.4, 55.2, 54.5; IR  $\nu_{\max}$  (film): 3499, 2918, 1726, 1617, 1589, 1266, 1148, 1099, 1012, 753  $\text{cm}^{-1}$ . HRMS-ESI (m/z) calculated  $[\text{M}+\text{Na}]^+$   $\text{C}_{41}\text{H}_{36}\text{O}_7\text{Br}$  719.1644, found 719.1643.

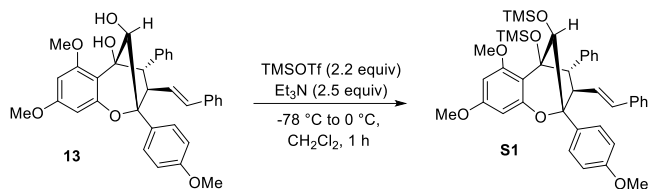

**TMS-aglain S1:** A flame dried test tube was charged with aglain **13** (200 mg, 0.37 mmol, 1 equiv) and dry  $\text{CH}_2\text{Cl}_2$  (2.5 mL, 0.15 M). The solution was cooled to  $-78\text{ }^\circ\text{C}$  before  $\text{Et}_3\text{N}$  (130  $\mu\text{L}$ , 0.93 mmol, 2.5 equiv) and TMSOTf (148  $\mu\text{L}$ , 0.82 mmol, 2.2 equiv) were added. The resulting mixture was stirred at  $-78\text{ }^\circ\text{C}$  for an additional 10 min before warming up to  $0\text{ }^\circ\text{C}$ . After 1 h, the reaction was quenched with 5 mL of saturated  $\text{NaHCO}_3$  (aq.). The mixture was extracted with  $\text{CH}_2\text{Cl}_2$  (3 mL  $\times$  3), washed with saturated  $\text{NaCl}$  (aq.), and dried over sodium sulfate. Column chromatography purification using hexanes/ $\text{EtOAc}$  (20:1 to 15:1) afforded TMS-aglain **S1** (249 mg, 98% yield) as a colorless oil.

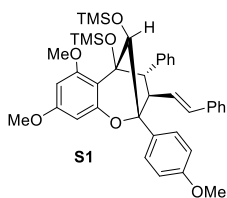

**S1:**  $R_f$ : 0.67 (hexanes:  $\text{EtOAc}$  = 4:1).  $^1\text{H}$  NMR (500 MHz,  $\text{CDCl}_3$ )  $\delta$  7.53 (d,  $J$  = 8.9 Hz, 2H), 7.11 (m, 5H), 7.05 (m, 1H), 7.00 (m, 2H), 6.93 (d,  $J$  = 8.9 Hz, 2H), 6.19 (d,  $J$  = 2.4 Hz, 1H), 5.92 (d,  $J$  = 15.9 Hz, 1H), 5.73 (d,  $J$  = 2.4 Hz, 1H), 5.50 (dd,  $J_1$  = 15.9 Hz,  $J_2$  = 7.4 Hz, 1H), 4.60 (s, 1H, OH), 3.82 (s, 3H), 3.80 (s, 3H), 3.39 (d,  $J$  = 10.7 Hz, 1H), 3.33 (dd,  $J_1$  = 10.7 Hz,  $J_2$  = 7.4 Hz, 1H), 2.94 (s, 3H), 0.04 (s, 9H), -0.22 (s, 9H);  $^{13}\text{C}$  NMR (125 MHz,  $\text{CDCl}_3$ )  $\delta$  194.8, 192.7, 163.2, 160.1, 159.4, 159.0, 136.5, 136.2, 135.3, 130.4, 129.7, 128.4, 128.2, 127.8, 127.3, 126.4, 125.5, 123.9, 115.0, 114.5, 98.0, 94.4, 91.7, 62.1, 56.1, 55.7, 55.2, 52.0; IR  $\nu_{\max}$  (film): 2937, 2848, 1696, 1607, 1512, 1456, 1403, 1260, 1155, 1104, 830, 751, 698  $\text{cm}^{-1}$ . HRMS-ESI (m/z) calculated  $[\text{M}+\text{H}]^+$   $\text{C}_{40}\text{H}_{49}\text{O}_6\text{Si}_2$ , 681.3068, found 681.3069.

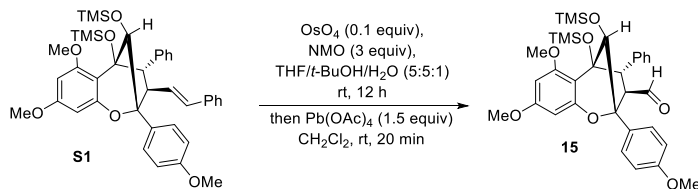

**Endo-10R-TMS-aldehyde 15:** A test tube was charged with TMS-aglain **S1** (249 mg, 0.37 mmol, 1 equiv), THF (4.7 mL) and  $t$ -BuOH (4.7 mL). Subsequently, 0.93 mL  $\text{OsO}_4$  (aq., 10 mg/mL) (9.3 mg, 0.036 mmol, 0.1 equiv) was added to the solution followed by addition of  $N$ -methylmorpholine oxide (NMO) (128.5 mg,

1.1 mmol, 3 equiv). The resulting mixture was stirred at room temperature for 12 h before 10 mL of saturated NaCl (aq.) was added. The mixture was extracted with Et<sub>2</sub>O (5 mL × 3), washed with saturated NaCl (aq.), and dried over sodium sulfate. The filtrate was concentrated *in vacuo* to afford the diol compound as a brown oil which was subjected to next step without further purification. The brown oil was dissolved in a test tube with 10 mL of CH<sub>2</sub>Cl<sub>2</sub>. Subsequently, Pb(OAc)<sub>4</sub> (243 mg, 0.55 mmol, 1.5 equiv) was added. The resulting solution was stirred at room temperature for 20 min before 20 mL saturated Na<sub>2</sub>S<sub>2</sub>O<sub>3</sub> was added to quench the reaction. The mixture was extracted with CH<sub>2</sub>Cl<sub>2</sub> (10 mL × 3), washed with saturated NaCl (aq.), and dried over sodium sulfate. Column chromatography purification using hexanes/EtOAc (15:1 to 10:1) afforded *endo*-TMS-aldehyde **15** (158 mg, 71% yield) as a colorless oil.

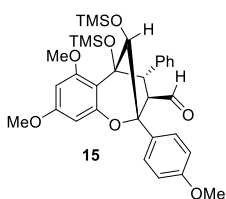

**15**: R<sub>f</sub>: 0.35 (hexanes:EtOAc = 3:17). <sup>1</sup>H NMR (500 MHz, CDCl<sub>3</sub>) δ 8.94 (d, J = 2.8 Hz, 1H), 7.54 (d, J = 8.8 Hz, 2H), 7.11 (m, 3H), 6.98 (d, J = 8.8 Hz, 2H), 6.92 (m, 2H), 6.21 (d, J = 1.2 Hz, 1H), 5.76 (d, J = 1.2 Hz, 1H), (d, J = 1.2 Hz, 1H), 4.53 (s, 1H, OH), 3.88 (d, J = 10.6 Hz, 1H), 3.84 (s, 3H), 3.82 (s, 3H), 3.52 (dd, J<sub>1</sub> = 10.6 Hz, J<sub>2</sub> = 2.8 Hz, 1H), 2.94 (s, 3H),

0.04 (s, 9H), -0.22 (s, 9H); <sup>13</sup>C NMR (125 MHz, CDCl<sub>3</sub>) δ 160.7, 160.0, 158.9, 154.1, 137.6, 137.3, 130.8, 130.1, 130.0, 128.9, 128.1, 127.7, 126.84, 126.77, 126.2, 126.0, 113.1, 106.7, 92.7, 91.4, 86.2, 83.4, 78.7, 59.7, 55.3, 55.1, 53.9, 52.4, 2.1, 1.3; IR U<sub>max</sub> (film): 2957, 1721, 1613, 1587, 1516, 1465, 1250, 1195, 1151, 1110, 1035, 899, 839, 743, 696 cm<sup>-1</sup>. HRMS-ESI (m/z) calculated [M+H]<sup>+</sup> C<sub>33</sub>H<sub>43</sub>O<sub>7</sub>Si<sub>2</sub>, 607.2547, found 607.2556.

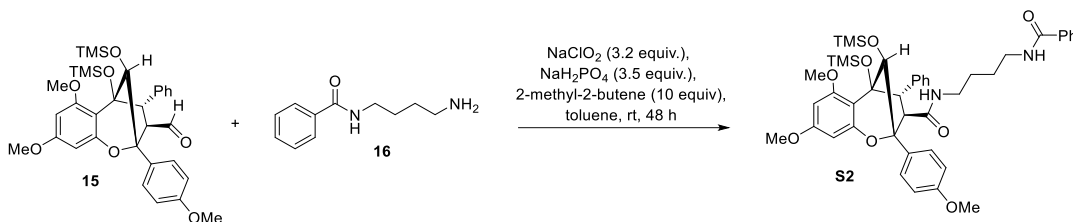

**TMS-foveoglin A S2**: A flame-dried test tube was charged with *endo*-TMS-aldehyde **15** (150 mg, 0.25 mmol, 1 equiv), amine **16**<sup>S1</sup> (238 mg, 1.24 mmol, 5 equiv) and dry toluene (2.5 mL, 0.1 M) under argon. The mixture was stirred at room temperature for 5 min before NaH<sub>2</sub>PO<sub>4</sub> (104 mg, 0.87 mmol, 3.5 equiv), 2-methyl-2-butene (0.26 mL, 2.5 mmol, 10 equiv) and NaClO<sub>2</sub> (72 mg, 0.79 mmol, 3.2 equiv) were consecutively added. The resulting heterogeneous mixture was stirred for 48 h at room temperature. The reaction mixture was then filtered to remove insoluble inorganic salts and the filtrate was concentrated *in vacuo*. Column chromatography purification using hexanes/EtOAc (6:1 to 3:1) afforded TMS-foveoglin A **S2** (147 mg, 71% yield) as a colorless oil.

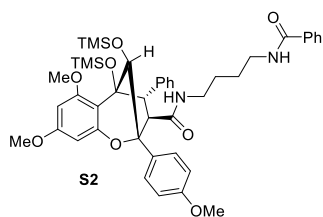

**S2:**  $R_f$ : 0.37 (hexanes: EtOAc = 1:1).  $^1\text{H NMR}$  (500 MHz,  $\text{CDCl}_3$ )  $\delta$  7.82 (m, 2H), 7.58 (d,  $J$  = 8.8 Hz, 2H), 7.50 (m, 1H), 7.44 (m, 2H), 7.08 (m, 3H), 6.92 (m, 2H), 6.85 (d,  $J$  = 8.8 Hz, 2H), 6.64 (t,  $J$  = 5.8 Hz, 1H, NH), 6.15 (d,  $J$  = 2.5 Hz, 1H), 5.73 (d,  $J$  = 2.5 Hz, 1H), 5.23 (t,  $J$  = 5.7 Hz, 1H, NH), 4.65 (s, 1H, OH), 4.02 (d,  $J$  = 10.2 Hz, 1H), 3.79 (s, 3H), 3.77 (s, 3H), 3.25 (m, 1H), 3.12 (m, 1H), 3.07 (d,  $J$  = 10.2 Hz, 2H), 2.93 (s, 3H), 2.74 (m, 1H), 2.49 (m, 1H), 1.07 (m, 2H), 0.84 (m, 2H), 0.03 (s, 9H), -0.27 (s, 9H);  $^{13}\text{C NMR}$  (125 MHz,  $\text{CDCl}_3$ )  $\delta$  169.8, 167.4, 160.8, 160.0, 159.3, 153.5, 137.6, 134.6, 131.3, 130.2, 128.9, 128.4, 128.0, 127.0, 126.9, 126.3, 113.0, 107.0, 92.8, 91.8, 84.7, 83.1, 78.5, 58.8, 55.4, 55.1, 53.9, 39.4, 38.9, 26.23, 26.21, 2.1, 1.2; IR  $u_{\text{max}}$  (film): 3308, 2958, 2904, 1642, 1614, 1615, 1520, 1151, 1112, 1040, 905, 839, 696  $\text{cm}^{-1}$ . HRMS-ESI ( $m/z$ ) calculated  $[\text{M}+\text{H}]^+$   $\text{C}_{44}\text{H}_{57}\text{N}_2\text{O}_8\text{Si}_2$ , 797.3653, found 797.3659.

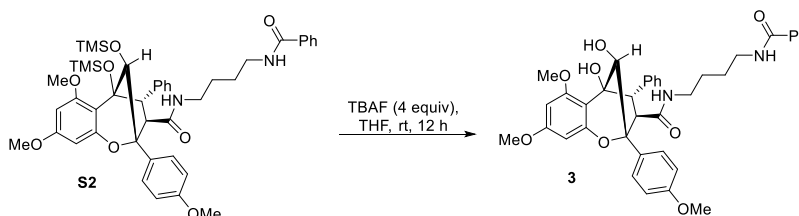

**Foveoglin A 3:** A flame dried test tube was charged with TMS-foveoglin A **S2** (120 mg, 0.15 mmol, 1 equiv) and dry THF (2 mL). Subsequently, TBAF (1 M THF solution, 0.36 mL, 0.36 mmol, 2.4 equiv) was added dropwise. The resulting mixture was stirred for 12 h before 5 mL of saturated NaCl (aq.) was added to quench the reaction. The mixture was extracted with EtOAc (5 mL  $\times$  3), washed with saturated NaCl (aq.), and dried over sodium sulfate. The filtrate was concentrated *in vacuo*. Column chromatography purification using hexanes/EtOAc (2:1 to 1:2) afforded foveoglin A **3** (94 mg, 96% yield) as an amorphous solid.

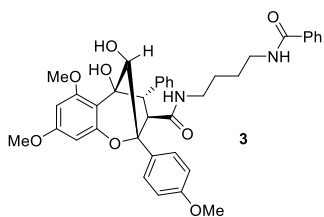

**3:**  $R_f$ : 0.51 (EtOAc). m.p. = 153  $^\circ\text{C}$  ( $\text{CH}_2\text{Cl}_2$ ).  $^1\text{H NMR}$  (500 MHz,  $\text{CDCl}_3$ )  $\delta$  7.81 (d,  $J$  = 7.5 Hz, 2H), 7.61 (d,  $J$  = 8.9 Hz, 2H), 7.52 (t,  $J$  = 7.3 Hz, 1H), 7.47 (t,  $J$  = 7.8 Hz, 2H), 7.16 (m, 3H), 6.93 (m, 2H), 6.89 (d,  $J$  = 8.9 Hz, 2H), 6.47 (brt,  $J$  = 5.7 Hz, 1H, NH), 6.25 (d,  $J$  = 2.3 Hz, 1H), 5.85 (d,  $J$  = 2.3 Hz, 1H), 5.54 (brt,  $J$  = 5.9 Hz, 1H, NH), 5.43 (s, 1H, OH), 4.91 (d,  $J$  = 5.5 Hz, 1H), 4.00 (d,  $J$  = 9.0 Hz, 1H), 3.78 (s, 3H), 3.77 (s, 3H), 3.29 (m, 1H), 3.23 (d,  $J$  = 9.0 Hz, 1H), 3.15 (m, 1H), 3.10 (s, 3H), 2.92 (m, 1H), 2.60 (m, 1H), 2.31 (d,  $J$  = 5.5 Hz, 1H, OH), 1.14 (m, 2H), 0.96 (m, 2H);  $^{13}\text{C NMR}$  (125 MHz,  $\text{CDCl}_3$ )  $\delta$  169.9, 167.4, 160.8, 160.3, 159.3, 152.9, 136.9, 134.6, 131.4, 129.2, 128.6, 128.5, 128.0, 127.7, 127.0, 126.9, 113.5, 104.3, 94.0, 93.0, 85.6, 81.8, 73.5, 59.0, 57.1, 55.5,

55.4, 39.4, 39.0, 26.3, 26.2; IR  $\nu_{\max}$  (film): 3375, 2955, 1641, 1618, 1517, 1492, 1458, 1305, 1254, 1148, 1105, 1037, 833  $\text{cm}^{-1}$ . HRMS-ESI ( $m/z$ ) calculated  $[\text{M}+\text{H}]^+$   $\text{C}_{38}\text{H}_{41}\text{N}_2\text{O}_8$ , 653.2863, found 653.2858.

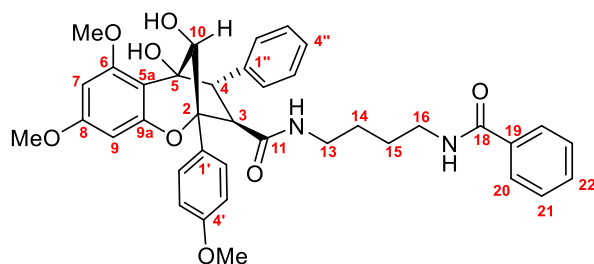

(±)-foveoglin A (3)

### $^1\text{H}$ NMR

| Positions | natural (–)-3                                                               | synthetic (±)-3<br>(this work)                                    |
|-----------|-----------------------------------------------------------------------------|-------------------------------------------------------------------|
|           | $\delta$ lit <sup>S2</sup> ( $\text{CDCl}_3$ )<br>( $J_{\text{H-H}}$ in Hz) | $\delta$ (500 MHz, $\text{CDCl}_3$ )<br>( $J_{\text{H-H}}$ in Hz) |
| 2         |                                                                             |                                                                   |
| 3         | 3.22, d (9.0)                                                               | 3.23, d (9.0)                                                     |
| 4         | 4.00, d (9.0)                                                               | 4.00, d (9.0)                                                     |
| 5         |                                                                             |                                                                   |
| 5-OH      | 5.44, s                                                                     | 5.43, s                                                           |
| 5a        |                                                                             |                                                                   |
| 6         |                                                                             |                                                                   |
| 7         | 5.86, d (2.2)                                                               | 5.85, d (2.3)                                                     |
| 8         |                                                                             |                                                                   |
| 9         | 6.26, d (2.2)                                                               | 6.25, d (2.3)                                                     |
| 9a        |                                                                             |                                                                   |
| 10        | 4.91, s                                                                     | 4.91, d (5.5)                                                     |
| 10-OH     |                                                                             | 2.31, d (5.5)                                                     |
| 11        |                                                                             |                                                                   |
| NH-12     | 5.49, brt (5.5)                                                             | 5.54, brt (5.7)                                                   |
| 13        | 2.93, m<br>2.61, m                                                          | 2.92, m<br>2.60, m                                                |
| 14        | 0.98, m                                                                     | 0.96, m                                                           |
| 15        | 1.16, m                                                                     | 1.14, m                                                           |
| 16        | 3.29, m<br>3.16, m                                                          | 3.29, m<br>3.15, m                                                |
| NH-17     | 6.46, brt (5.5)                                                             | 6.47, brt (5.7)                                                   |
| 18        |                                                                             |                                                                   |
| 19        |                                                                             |                                                                   |
| 20, 24    | 7.82, d (8.0)                                                               | 7.81, d (7.5)                                                     |
| 21, 23    | 7.47, t (7.7)                                                               | 7.47, t (7.8)                                                     |
| 22        | 7.53, t (7.2)                                                               | 7.52, t (7.3)                                                     |

|                      |               |               |
|----------------------|---------------|---------------|
| 1'                   |               |               |
| 2', 6'               | 7.62, d (8.9) | 7.61, d (8.9) |
| 3', 5'               | 6.89, d (8.7) | 6.89, d (8.9) |
| 4'                   |               |               |
| 1''                  |               |               |
| 2'', 6''             | 6.93, m       | 6.93 m        |
| 3'', 5''             | 7.16, m       | 7.16, m       |
| 4''                  | 7.16, m       | 7.16, m       |
| OCH <sub>3</sub> -6  | 3.11, s       | 3.10, s       |
| OCH <sub>3</sub> -8  | 3.79, s       | 3.78, s       |
| OCH <sub>3</sub> -4' | 3.77, s       | 3.77, s       |

### <sup>13</sup>C NMR

| Positions | natural (-)- <b>3</b>                     | synthetic (±)- <b>3</b><br>(this work) |
|-----------|-------------------------------------------|----------------------------------------|
|           | δ lit. <sup>52</sup> (CDCl <sub>3</sub> ) | δ (125 MHz, CDCl <sub>3</sub> )        |
| 2         | 85.6                                      | 85.6                                   |
| 3         | 59.0                                      | 59.0                                   |
| 4         | 57.1                                      | 57.1                                   |
| 5         | 81.8                                      | 81.8                                   |
| 5-OH      |                                           |                                        |
| 5a        | 104.2                                     | 104.3                                  |
| 6         | 160.3                                     | 160.3                                  |
| 7         | 93.0                                      | 93.0                                   |
| 8         | 160.8                                     | 160.8                                  |
| 9         | 93.9                                      | 94.0                                   |
| 9a        | 152.8                                     | 152.9                                  |
| 10        | 73.5                                      | 73.5                                   |
| 10-OH     |                                           |                                        |
| 11        | 170.0                                     | 170.0                                  |
| NH-12     |                                           |                                        |
| 13        | 39.0                                      | 39.0                                   |
| 14        | 26.2                                      | 26.2                                   |
| 15        | 26.3                                      | 26.3                                   |
| 16        | 39.4                                      | 39.4                                   |
| NH-17     |                                           |                                        |
| 18        | 167.5                                     | 167.4                                  |
| 19        | 134.5                                     | 134.6                                  |
| 20, 24    | 127.0                                     | 127.0                                  |
| 21, 23    | 128.6                                     | 128.6                                  |
| 22        | 131.5                                     | 131.4                                  |
| 1'        | 129.2                                     | 129.2                                  |

|                      |       |       |
|----------------------|-------|-------|
| 2', 6'               | 128.0 | 128.0 |
| 3', 5'               | 113.6 | 113.5 |
| 4'                   | 159.3 | 159.3 |
| 1''                  | 136.8 | 140.7 |
| 2'', 6''             | 128.6 | 128.5 |
| 3'', 5''             | 127.7 | 127.7 |
| 4''                  | 127.0 | 127.0 |
| OCH <sub>3</sub> -6  | 55.5  | 55.5  |
| OCH <sub>3</sub> -8  | 55.4  | 55.4  |
| OCH <sub>3</sub> -4' | 55.4  | 55.4  |

### Condition Optimization for ESIPT Photocycloaddition of **5** and **8**.

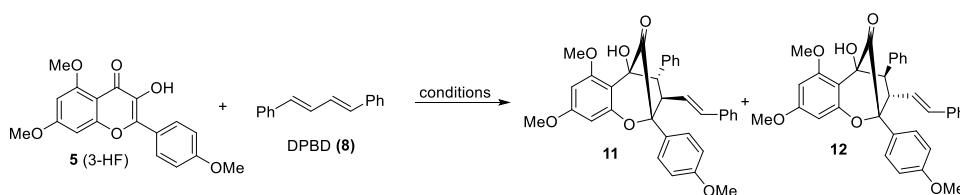

| Entry | Solvent                                                | Temp. Time | Additive     | Outcome (11:12) <sup>a</sup> |
|-------|--------------------------------------------------------|------------|--------------|------------------------------|
| 1     | CH <sub>2</sub> Cl <sub>2</sub>                        | 0 °C, 6 h  | N.A.         | 48%, 2:1 d.r.                |
| 2     | CH <sub>2</sub> Cl <sub>2</sub> /MeOH (3:1)            | 0 °C, 6 h  | N.A.         | 43%, 3:1 d.r.                |
| 3     | CH <sub>2</sub> Cl <sub>2</sub>                        | 0 °C, 6 h  | p-TsOH       | 37%, 3:1 d.r.                |
| 4     | CH <sub>2</sub> Cl <sub>2</sub> / <i>i</i> -PrOH (2:1) | 0 °C, 6 h  | N.A.         | 51%, 1:1 d.r.                |
| 5     | CH <sub>2</sub> Cl <sub>2</sub>                        | 0 °C, 6 h  | benzophenone | 50%, 2:1 d.r.                |
| 6     | CH <sub>3</sub> CN/MeOH (1:1)                          | 0 °C, 6 h  | N.A.         | 47%, 2:1 d.r.                |
| 7     | THF                                                    | 0 °C, 6 h  | N.A.         | 47%, 3:1 d.r.                |
| 8     | CHCl <sub>3</sub> /TFE (7:3)                           | 0 °C, 6 h  | N.A.         | 67%, 5:1 d.r.                |

<sup>a</sup> Diastereoselectivity determined by <sup>1</sup>H NMR analysis; isolated yield obtained for the mixture of diastereomers.

A 10 mL round bottom flask was charged with 3-hydroxyflavone **5** (30 mg, 0.09 mmol, 1 equiv), DPBD **8** (94 mg, 0.46 mmol, 5 equiv), and 9 mL of the indicated



solvent mixture (0.01 M for 3-HF **5**). The flask was connected with the continuous photoflow reactor setup and placed into a sonicator with an ice-bath. Subsequently, the peristaltic pump was turned on to circulate the reaction mixture and the argon bubbling with sonication was continued for an additional 15 min before the UV-lamp (Rayonet,  $\lambda_{\text{max}} = 350 \text{ nm}$ ) was turned on. After 6 h, the reaction mixture was collected back into the flask and concentrated under vacuum. Purification *via* flash chromatography using a gradient of hexanes/EtOAc (10:1 to 3:1) afforded cyclopenta[*bc*]benzopyrans **11** and **12** as mixture of isomers.

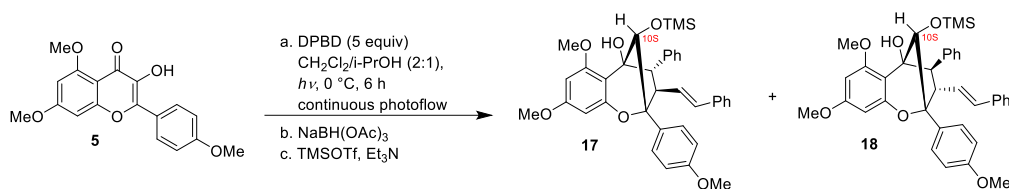

**Exo-10S-TMS-aglain 18:** A 100 mL round bottom flask was charged with 3-hydroxyflavone **5** (500 mg, 1.52 mmol, 1 equiv) and DPBD **8** (1.57 g, 7.61 mmol, 5 equiv) in 75 mL of  $\text{CH}_2\text{Cl}_2/i\text{-PrOH}$  (2:1) (0.02 M for 3-HF **5**). The flask was connected with the continuous photoflow reactor followed by degassing with argon gas for 10 min. Subsequently, the peristaltic pump was turned on to circulate the reaction mixture and the argon gas was kept for another 10 min before the UV-lamp (Rayonet,  $\lambda > 315 \text{ nm}$ ) was turned on. After 6 h, the reaction mixture was collected back into the flask and was concentrated under vacuum. Purification *via* flash chromatography using a gradient of hexanes/EtOAc (10:1 to 3:1) afforded cyclopenta[*bc*]benzopyrans **11** and **12** as mixture of isomers which were used in next step without further purification. The isomeric ratio was determined using  $^1\text{H}$  NMR analysis to be 1:1 (426 mg, 52% yield, 0.8 mmol). A flame-dried 100 mL flask was charged with  $\text{NaBH}(\text{OAc})_3$  (1.01 g, 4.78 mmol, 6 equiv) and HOAc (0.27 mL, 4.78 mmol) in  $\text{PhCF}_3$  (20 mL) at rt under argon. The mixture was then sonicated briefly and stirred at rt for 10 min. A mixture of **11** and **12** (426 mg, 0.8 mmol, 1 equiv) in 20 mL of  $\text{PhCF}_3$  (0.02 M) was then added at rt at one portion under argon. The resulting mixture was then stirred for 14 h and was quenched with saturated ammonium chloride. The mixture was extracted with  $\text{CH}_2\text{Cl}_2$ , washed with saturated sodium bicarbonate, dried over sodium sulfate, and the filtrate concentrated *in vacuo*.  $^1\text{H}$  NMR analysis of the crude extract indicated that the reduction was diastereoselective in favor of the  $10S$ -isomer (d.r.= 10:1). Column chromatography purification using hexanes/EtOAc (5:1) afforded an inseparable mixture of isomeric aglains (4

isomers combined, 406 mg, 95% yield) which was used in the next step without further purification. Preparative thin layer chromatography purification of 20 mg mixture material using hexanes/EtOAc (9:1) afforded pure *exo*-aglain compound **S3** (15 mg, 0.028 mmol).

To a flame dried test tube were added the mixture of isomeric aglains (406 mg, 0.76 mmol, 1 equiv), Et<sub>3</sub>N (0.33 mL, 2.39 mmol, 3 equiv) and CH<sub>2</sub>Cl<sub>2</sub> (7.5 mL, 0.1 M). After the resulting mixture was cooled to -78 °C, TMSOTf (290 μL, 1.6 mmol, 2 equiv) was added dropwise before the temperature was raised to 0 °C for 1 h. Ice-cooled saturated sodium bicarbonate was added to quench the reaction and CH<sub>2</sub>Cl<sub>2</sub> (5 mL × 2) was employed for extraction. The combined organic layer was washed with saturated sodium chloride and dried over sodium sulfate. The filtrate was concentrated *in vacuo* and purified by column chromatography using a gradient of hexanes/Et<sub>2</sub>O (30:1 to 20:1). *Exo*-10*S*-TMS-aglain **18** (186 mg, 0.35 mmol) was obtained in 23% yield from 3-HF **5** as a colorless oil. *Endo*-10*S*-TMS-aglain **17** (190 mg, 0.35 mmol) was also obtained in 23% yield from 3-HF **5**.

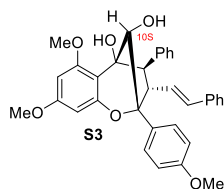

**S3**: R<sub>f</sub>: 0.30 (hexanes: EtOAc = 7:3). <sup>1</sup>H NMR (500 MHz, CDCl<sub>3</sub>) δ 7.74 (d, J = 9.0 Hz, 2H), 7.49 (d, J = 7.3 Hz, 2H), 7.36 (t, J = 7.3 Hz, 2H), 7.28 (d, J = 7.3 Hz, 1H), 7.20 (m, 4H), 7.12 (m, 1H), 6.96 (d, J = 9.0 Hz, 2H), 6.83 (dd, J<sub>1</sub> = 16 Hz, J<sub>2</sub> = 8.3 Hz, 1H), 6.28 (d, J = 2.3 Hz, 1H), 6.25 (d, J = 16 Hz, 1H), 6.14 (d, J = 2.3 Hz, 1H), 5.18 (s, 1H, OH), 4.40 (s, 1H, OH), 4.37 (dd, J<sub>1</sub> = 8.3 Hz, J<sub>2</sub> = 7.7 Hz, 1H), 3.88 (s, 3H), 3.82 (s, 3H), 3.81 (s, 3H), 3.65 (d, J = 7.7 Hz, 1H), 2.90 (s, 1H, OH); <sup>13</sup>C NMR (125 MHz, CDCl<sub>3</sub>) δ 160.5, 159.3, 155.9, 153.9, 140.4, 137.2, 132.1, 130.2, 130.1, 128.8, 128.2, 128.1, 127.8, 127.1, 126.7, 126.2, 113.6, 113.3, 94.2, 92.3, 88.3, 81.6, 79.7, 64.9, 57.2, 56.1, 55.5, 55.2; IR  $\nu_{\text{max}}$  (film): 3497, 3027, 2939, 1615, 1589, 1515, 1456, 1253, 1150, 1097, 1050, 830, 749, 698 cm<sup>-1</sup>. HRMS-ESI (m/z) calculated [M+Na]<sup>+</sup> C<sub>34</sub>H<sub>32</sub>O<sub>6</sub>Na, 559.2097, found 559.2095.

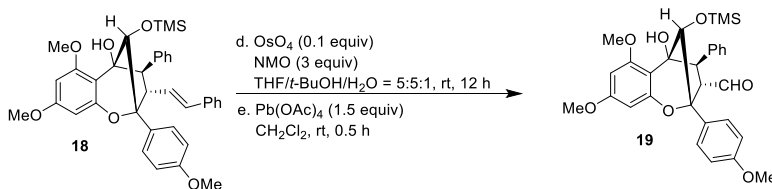

**Exo-10*S*-TMS-aglain aldehyde 19**: A flame dried test tube was charged with **18** (150 mg, 0.25 mmol, 1 equiv), *N*-methylmorpholine-*N*-oxide (86.6 mg, 0.74 mmol, 3 equiv) and mixture of THF/*t*-BuOH (1:1) (6.4 mL, 0.04 M). After formation of a homogeneous solution, 0.64 mL OsO<sub>4</sub> (10 wt.% aq., 6.4 mg, 0.025 mmol, 0.1 equiv) aqueous solution was added. The solution immediately turned brown and was stirred for 12 h before 5 mL of saturated sodium chloride was

added to quench the reaction. The reaction mixture was extracted with Et<sub>2</sub>O (5 mL × 3), the combined organic layer was washed with 10 mL of saturated sodium chloride, and dried over sodium sulfate. The filtrate was concentrated *in vacuo*. The crude diol product was used in the next step without further purification. Subsequently, the crude diol product was dissolved in 5 mL of CH<sub>2</sub>Cl<sub>2</sub>. Pb(OAc)<sub>4</sub> (164 mg, 0.37 mmol, 1.5 equiv) was added. The resulting mixture was stirred for 0.5 h before 5 mL of saturated Na<sub>2</sub>S<sub>2</sub>O<sub>3</sub> was added to quench the reaction. The combined organic layer from extraction with CH<sub>2</sub>Cl<sub>2</sub> (3 mL × 3) was washed with 10 mL of saturated sodium chloride and dried over sodium sulfate. The filtrate was concentrated *in vacuo* and purified by column chromatography using a gradient of hexanes/CH<sub>2</sub>Cl<sub>2</sub>/EtOAc (20:1:1 to 15:1:1) to afford the *exo*-10*S*-TMS-aglain aldehyde **19** (95.4 mg, 0.18 mmol, 73% yield) as a colorless oil.

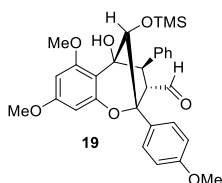

**19**: R<sub>f</sub>: 0.19 (EtOAc). <sup>1</sup>H NMR (500 MHz, CDCl<sub>3</sub>) δ 9.69 (d, J = 0.8 Hz, 1H), 7.71 (d, J = 8.8 Hz, 2H), 7.54 (d, J = 7.5 Hz, 2H), 7.32 (t, J = 7.5 Hz, 2H), 7.23 (t, J = 7.5 Hz, 1H), 7.00 (d, J = 8.8 Hz, 2H), 6.14 (d, J = 2.3 Hz, 1H), 6.13 (d, J = 2.3 Hz, 1H), 5.04 (s, 1H, OH), 4.34 (d, J = 6.2, 1H), 4.24 (dd, J<sub>1</sub> = 6.2 Hz, J<sub>2</sub> = 0.8 Hz, 1H), 4.19 (s, 1H), 3.87 (s, 3H), 3.85 (s, 3H), 3.77 (s, 3H), -0.16 (s, 9H); <sup>13</sup>C NMR (125 MHz, CDCl<sub>3</sub>) δ 200.1, 160.4, 159.6, 156.4, 153.1, 140.9, 130.6, 129.6, 128.7, 127.8, 126.5, 113.5, 113.2, 93.8, 93.0, 88.7, 82.99, 92.96, 80.5, 66.2, 56.1, 55.5, 55.3, -0.26; IR *umax* (film): 3502, 2927, 2856, 1728, 1617, 1515, 1459, 1253, 1152, 1089, 840 cm<sup>-1</sup>. HRMS-ESI (m/z) calculated [M+H]<sup>+</sup> C<sub>30</sub>H<sub>35</sub>O<sub>7</sub>Si, 535.2152, found 535.2144.

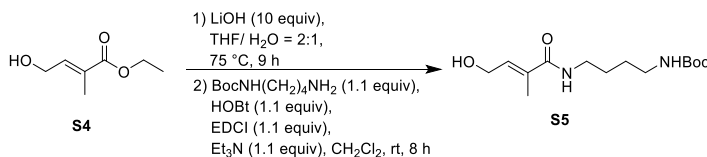

**Boc-protected hydroxytiglic amide S5**: Compound **S4** was prepared using the reported procedure.<sup>53</sup> Subsequently, a 100 mL round bottom flask was charged with compound **S4** (2.0 g, 13.9 mmol, 1 equiv), LiOH (3.32g, 139 mmol, 10 equiv), and 50 mL of THF/H<sub>2</sub>O (2:1) as solvent. The mixture was stirred for 9 h at 75 °C. After the reaction was cooled to room temperature, 1M HCl (aq.) was added to acidify the pH of the solution to 4. The mixture was then extracted with EtOAc (20 mL × 3). The combined organic layers were washed with saturated sodium chloride and dried over sodium sulfate. After concentration *in vacuo*, the crude material was purified by column chromatography using a gradient of hexanes/EtOAc (1:1 to 1:4). The hydroxytiglic acid (1.6 g, quantitative) was obtained as a white solid. Next, a 50 mL flame-dried flask was charged with hydroxytiglic acid (1.6, 8.5 mmol, 1 equiv), HOBT (1.26 g, 9.35 mmol, 1.1 equiv),

EDCI (1.79 g, 9.35 mmol, 1.1 equiv), *mono*-Boc-protected diaminobutane (1.09 g, 9.35 mmol, 1.1 equiv), Et<sub>3</sub>N (1.3 mL, 9.35 mmol, 1.1 equiv), and CH<sub>2</sub>Cl<sub>2</sub> (57 mL, 0.15 M). The resulting mixture was stirred at room temperature for 8 h. Then, 50 mL of saturated ammonium chloride was added to quench the reaction. The reaction mixture was extracted with CH<sub>2</sub>Cl<sub>2</sub> (50 mL × 3). The combined organic layer was washed with saturated sodium chloride and dried over sodium sulfate. After concentration *in vacuo*, purification by column chromatography using a gradient of hexanes/EtOAc (1:2 to 1:5) afforded compound **S5** (2.25 g, 7.86 mmol) in 92% yield as a white solid.

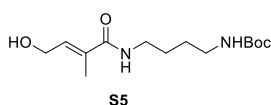

**S5**: R<sub>f</sub>: 0.19 (EtOAc). m.p. = 80 °C (CH<sub>2</sub>Cl<sub>2</sub>). <sup>1</sup>H NMR (500 MHz, CDCl<sub>3</sub>) δ 6.35 (td, J<sub>1</sub> = 6.1 Hz, J<sub>2</sub> = 1.1 Hz, 1H), 6.22 (brs, 1H, NH), 4.73 (brs, 1H, NH), 4.29 (d, J = 6.1 Hz, 2H), 3.31 (m, 2H), 3.11 (m, 2H), 1.84 (d, J = 1.1 Hz, 3H), 1.53 (m, 4H), 1.42 (s, 9H); <sup>13</sup>C NMR (125 MHz, CDCl<sub>3</sub>) δ 169.4, 156.2, 133.9, 132.4, 79.3, 59.3, 40.1, 39.4, 28.4, 27.6, 26.6, 13.0; IR  $\nu_{\text{max}}$  (film): 3338, 2934, 1690, 1621, 1533, 1366, 1281, 1169, 1017 cm<sup>-1</sup>. HRMS-ESI (m/z) calculated [M+Na]<sup>+</sup> C<sub>14</sub>H<sub>26</sub>O<sub>4</sub>N<sub>2</sub>Na, 309.1790, found 309.1799.

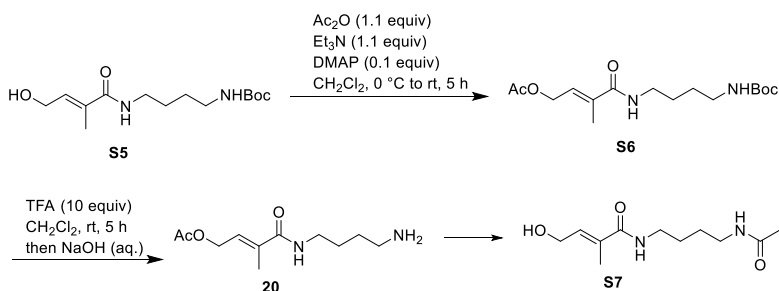

**Tiglic amide acetate 20**: A 50 mL flame-dried round bottom flask was charged with compound **S5** (2.0 g, 7.0 mmol, 1 equiv), Et<sub>3</sub>N (1.1 mL, 7.7 mmol, 1.1 equiv), DMAP (85 mg, 0.7 mmol, 0.1 equiv), and CH<sub>2</sub>Cl<sub>2</sub> (47 mL, 0.15 M). After the mixture was cooled to 0 °C by ice bath, Ac<sub>2</sub>O (0.75 mL, 7.7 mmol, 1.1 equiv) was added dropwise. The reaction was warmed to rt and stirred for 5 h before 20 mL of saturated sodium bicarbonate was added. The mixture was extracted with CH<sub>2</sub>Cl<sub>2</sub> (50 mL × 3), washed with saturated sodium chloride (50 mL), and dried over anhydrous sodium sulfate. Purification by column chromatography using a gradient of hexanes/EtOAc (1:1 to 1:3) afforded compound **S6** (2.1 g, 6.4 mmol) as a white solid (92% yield). Subsequently, compound **S6** (2.1 g, 6.4 mmol, 1 equiv) was redissolved by CH<sub>2</sub>Cl<sub>2</sub> (43 mL, 0.15 M) in a 25 mL flame-dried round bottom flask. Trifluoroacetic acid (4.9 mL, 64 mmol, 10 equiv) was then added dropwise to the solution and the reaction was stirred for 5 h. The reaction

mixture was concentrated *in vacuo*. The remaining TFA was removed by azeotrope with benzene (15 mL × 3). The material was reconstituted with 50 mL of EtOAc and washed with sat. sodium chloride and aqueous 1M NaOH. After the aqueous layer was discarded, the organic layer was washed with saturated sodium chloride (50 mL) and dried over sodium sulfate to afford tiglic amide acetate **20** (1.05 g, 4.6 mmol, 72% yield) as a colorless oil. Compound **20** was found to undergo acyl transfer to afford amide **S7**. Accordingly, compound **20** was used in the next step without further purification.

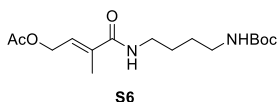

**S6:**  $R_f$ : 0.19 (EtOAc/hexanes = 1:1). m.p. = 64 °C ( $\text{CH}_2\text{Cl}_2$ ).  $^1\text{H}$  NMR (500 MHz,  $\text{CDCl}_3$ )  $\delta$  6.30 (brs, 1H, NH), 6.23 (td,  $J_1 = 6.3$  Hz,  $J_2 = 1.3$  Hz, 1H), 4.80 (brs, 1H, NH), 4.63 (d,  $J = 6.3$  Hz, 2H), 3.26 (m, 2H), 3.05 (m, 2H), 1.99 (s, 3H), 1.83 (d,  $J = 1.3$  Hz, 3H), 1.47 (m, 4H), 1.35 (s, 9H);  $^{13}\text{C}$  NMR (125 MHz,  $\text{CDCl}_3$ )  $\delta$  169.4, 156.2, 133.9, 132.4, 79.3, 59.3, 40.1, 39.4, 28.4, 27.6, 26.6, 13.0; IR  $U_{\text{max}}$  (film): 3338, 2933, 1694, 1627, 1529, 1365, 1228, 1168, 1028  $\text{cm}^{-1}$ . HRMS-ESI (m/z) calculated  $[\text{M}+\text{Na}]^+$   $\text{C}_{16}\text{H}_{28}\text{O}_5\text{N}_2\text{Na}$ , 351.1896, found 351.1901.

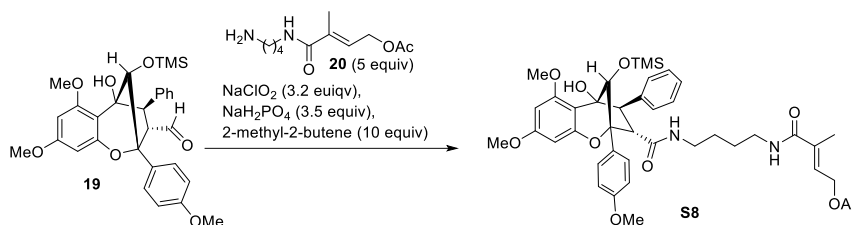

**Silyl-protected perviridisin B S8:** A flame-dried test tube was charged with aldehyde **19** (95.4 mg, 0.18 mmol, 1 equiv) and amine **20** (259 mg, 0.9 mmol, 5 equiv), and 2 mL of dry toluene (0.09 M). After stirring for 5 min,  $\text{NaClO}_2$  (52 mg, 0.57 mmol, 3.2 equiv),  $\text{NaH}_2\text{PO}_4$  (75 mg, 0.62 mmol, 3.5 equiv) and 2-methyl-2-butene (0.19 mL, 1.78 mmol, 10 equiv) were added. The resulting mixture was stirred for 48 h at room temperature before filtration to remove solids. The filtrate was concentrated *in vacuo* and purified by column chromatography using a gradient of hexanes/EtOAc (2:1 to 1:2) to afford silyl-protected perviridisin B **S8** (111 mg, 0.15 mmol, 82%) as a colorless oil.

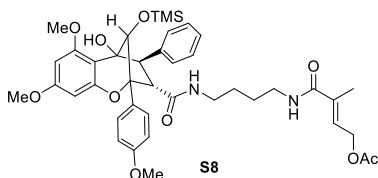

**S8:**  $R_f$ : 0.2 (EtOAc/hexanes = 2:1).  $^1\text{H}$  NMR (500 MHz,  $\text{CDCl}_3$ )  $\delta$  7.71 (d,  $J = 8.7$  Hz, 2H), 7.57 (d,  $J = 7.8$  Hz, 2H), 7.31 (m, 2H), 7.22 (m, 1H), 6.98 (d,  $J = 8.7$  Hz, 2H), 6.28 (td,  $J_1 = 6.5$  Hz,  $J_2 = 1.3$  Hz, 1H), 6.15 (d,  $J = 2.6$  Hz, 1H), 6.12 (d,  $J = 2.6$  Hz, 1H), 5.94 (brs, 1H, NH), 5.22 (brt,  $J = 5.8$  Hz, 1H, NH), 4.99 (s, 1H, OH), 4.70 (d,  $J = 6.5$  Hz, 2H), 4.34 (d,  $J$

= 6.8 Hz, 1H), 4.14 (s, 1H), 4.12 (d, J = 6.8 Hz, 1H), 3.86 (s, 3H), 3.83 (s, 3H), 3.77 (s, 3H), 3.19 (m, 3H), 2.87 (m, 1H), 2.08 (s, 3H), 1.86 (d, J = 1.3 Hz, 3H), -0.14 (s, 9H);  $^{13}\text{C}$  NMR (125 MHz,  $\text{CDCl}_3$ )  $\delta$  170.8, 169.8, 168.4, 160.2, 159.5, 156.4, 153.1, 141.5, 134.9, 130.6, 130.2, 128.6, 128.2, 128.1, 127.7, 126.4, 113.6, 113.5, 93.9, 92.7, 88.0, 83.3, 80.1, 60.8, 60.7, 58.5, 56.1, 55.4, 39.4, 38.5, 27.2, 25.9, 20.8, 13.1, -0.2; IR  $u_{\text{max}}$  (film): 3506, 3416, 3346, 2957, 1742, 1619, 1516, 1458, 1253, 1152, 1091, 839  $\text{cm}^{-1}$ . HRMS-ESI (m/z) calculated  $[\text{M}+\text{Na}]^+$   $\text{C}_{41}\text{H}_{52}\text{O}_{10}\text{N}_2\text{SiNa}$ , 783.3289, found 783.3279.

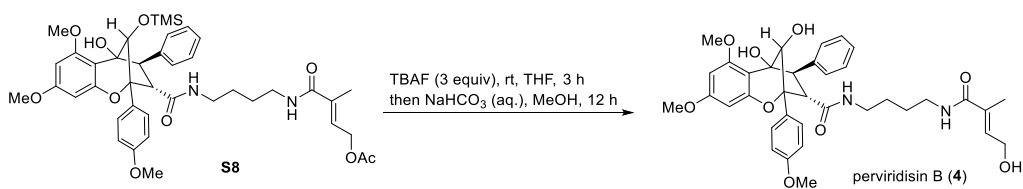

**Perviridisin B 4:** A flame dried test tube was charged with compound **S8** (111 mg, 0.15 mmol, 1 equiv), 1 mL THF and tetra-*n*-butylammonium fluoride (1M solution in THF, 0.44 mL, 0.44 mmol, 3 equiv). The resulting solution was stirred for 3 h. 3 mL of saturated sodium chloride and 10 mL EtOAc then was added to form a bilayer mixture and the aqueous layer was discarded. The organic layer was washed with 5 mL saturated sodium chloride and dried over sodium sulfate. The filtrate was concentrated *in vacuo* and was redissolved in 2 mL of MeOH which was followed by addition of 0.2 mL of saturated sodium bicarbonate. The mixture was stirred for 12 h and concentrated *in vacuo*. Purification by preparative TLC using EtOAc as solvent afforded perviridisin B **4** (86 mg, 0.12 mmol, 82% yield) as a white solid.

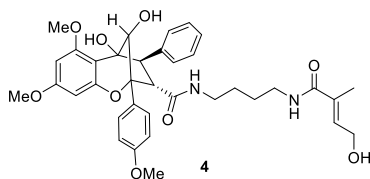

**4:**  $R_f$ : 0.11 (EtOAc). m.p. = 269 - 271  $^{\circ}\text{C}$  ( $\text{CH}_2\text{Cl}_2$ ).  $^1\text{H}$  NMR (500 MHz,  $\text{CDCl}_3$ )  $\delta$  7.84 (d, J = 8.5 Hz, 2H), 7.52 (d, J = 7.5 Hz, 2H), 7.35 (t, J = 7.5 Hz, 2H), 7.28 (m, 1H), 7.04 (d, J = 8.5 Hz, 2H), 6.26 (td,  $J_1 = 6.5$  Hz,  $J_2 = 1.5$  Hz, 1H), 6.16 (d, J = 2.5 Hz, 1H), 6.14 (d, J = 2.5 Hz, 1H), 6.09 (brs, 1H), 5.22 (s, 1H, OH), 5.22 (brt, d = 6.4 Hz, 1H, NH), 4.39 (d, J = 6.5 Hz, 1H), 4.28 (d, J = 6.5 Hz, 1H), 4.26 (d, J = 5.1 Hz, 2H), 4.19 (s, 1H), 3.89 (s, 3H), 3.87 (s, 3H), 3.77 (s, 3H), 3.26 (m, 2H), 3.16 (m, 1H), 2.85 (m, 1H), 2.61 (s, 1H, OH), 1.81 (d, J = 1.5 Hz, 3H), 1.64 (m, 2H), 1.31 (m, 2H);  $^{13}\text{C}$  NMR (125 MHz,  $\text{CDCl}_3$ )  $\delta$  169.5, 169.1, 160.4, 150.6, 156.1, 153.0, 140.6, 133.1, 132.9, 129.9, 129.6, 128.2, 126.8, 114.0, 112.1, 94.0, 92.6, 87.1, 82.4, 79.8, 60.3, 59.4, 58.1, 55.4, 39.3, 38.6, 27.3, 25.7, 13.0; IR  $u_{\text{max}}$  (film): 3408, 2937, 1669, 1619,



1591, 1516, 1459, 1440, 1255, 1252, 1201, 1152, 1098, 1034, 834, 755  $\text{cm}^{-1}$ .  
 HRMS-ESI (m/z) calculated  $[\text{M}+\text{H}]^+$   $\text{C}_{36}\text{H}_{43}\text{O}_9\text{N}_2$ , 647.2969, found 647.2970.

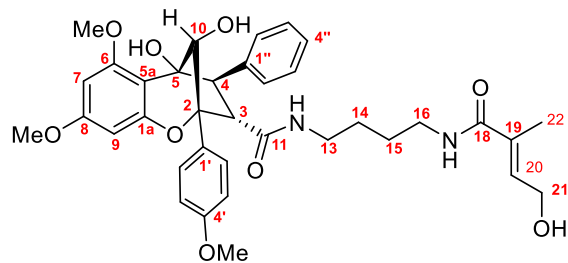

(±)-perviridisin B (4)

### $^1\text{H}$ NMR

|           | natural (+)-4                                                               | synthetic (±)-4<br>(this work)                                    |
|-----------|-----------------------------------------------------------------------------|-------------------------------------------------------------------|
| Positions | $\delta$ lit <sup>54</sup> ( $\text{CDCl}_3$ )<br>( $J_{\text{H-H}}$ in Hz) | $\delta$ (500 MHz, $\text{CDCl}_3$ )<br>( $J_{\text{H-H}}$ in Hz) |
| 2         |                                                                             |                                                                   |
| 3         | 4.28, d (6.7)                                                               | 4.28, d (6.5)                                                     |
| 4         | 4.40, d (6.5)                                                               | 4.39, d (6.5)                                                     |
| 5         |                                                                             |                                                                   |
| 5-OH      | 5.23, s                                                                     | 5.22, s                                                           |
| 5a        |                                                                             |                                                                   |
| 6         |                                                                             |                                                                   |
| 7         | 6.14, d (2.1)                                                               | 6.14, d (2.5)                                                     |
| 8         |                                                                             |                                                                   |
| 9         | 6.16, d (2.2)                                                               | 6.16, d (2.5)                                                     |
| 9a        |                                                                             |                                                                   |
| 10        | 4.20, s                                                                     | 4.19, s                                                           |
| 10-OH     | 2.97, brs                                                                   | 2.98, brs                                                         |
| 11        |                                                                             |                                                                   |
| NH-12     | 5.21, brt (6.4)                                                             | 5.22, brt (6.4)                                                   |
| 13        | 2.86, m<br>3.17, m                                                          | 2.85, m<br>3.16, m                                                |
| 14        | 1.33, m                                                                     | 1.31, m                                                           |
| 15        | 1.60, m                                                                     | 1.64, m                                                           |
| 16        | 3.26, m                                                                     | 3.26, m                                                           |
| NH-17     | 6.10, brt (5.2)                                                             | 6.09, brs                                                         |
| 18        |                                                                             |                                                                   |
| 19        |                                                                             |                                                                   |
| 20        | 6.27, brt (6.0)                                                             | 6.26, td (6.5, 1.5)                                               |
| 21        | 4.27                                                                        | 4.26                                                              |
| 22        | 1.82, s                                                                     | 1.81, d (1.5)                                                     |

|                      |                   |                   |
|----------------------|-------------------|-------------------|
| 1'                   |                   |                   |
| 2', 6'               | 7.84, d (8.9)     | 7.84, d (8.5)     |
| 3', 5'               | 7.05, d (8.9)     | 7.04, d (8.5)     |
| 4'                   |                   |                   |
| 1''                  |                   |                   |
| 2'', 6''             | 7.52, d (7.3)     | 7.52 d (7.5)      |
| 3'', 5''             | 7.36, t (7.4)     | 7.35, t (7.5)     |
| 4''                  | 7.29 (overlapped) | 7.28 (overlapped) |
| OCH <sub>3</sub> -6  | 3.89, s           | 3.89, s           |
| OCH <sub>3</sub> -8  | 3.77, s           | 3.77, s           |
| OCH <sub>3</sub> -4' | 3.87, s           | 3.87, s           |

### <sup>13</sup>C NMR

| Positions | natural (+)- <b>4</b>                     | synthetic (±)- <b>4</b><br>(this work) |
|-----------|-------------------------------------------|----------------------------------------|
|           | δ lit. <sup>54</sup> (CDCl <sub>3</sub> ) | δ (125 MHz, CDCl <sub>3</sub> )        |
| 2         | 87.1                                      | 87.1                                   |
| 3         | 60.3                                      | 60.3                                   |
| 4         | 58.1                                      | 58.1                                   |
| 5         | 79.9                                      | 79.8                                   |
| 5-OH      |                                           |                                        |
| 5a        | 112.0                                     | 112.1                                  |
| 6         | 156.2                                     | 156.1                                  |
| 7         | 92.6                                      | 92.6                                   |
| 8         | 160.4                                     | 160.4                                  |
| 9         | 94.0                                      | 94.0                                   |
| 9a        | 153.0                                     | 153.0                                  |
| 10        | 82.4                                      | 82.4                                   |
| 10-OH     |                                           |                                        |
| 11        | 169.5                                     | 169.5                                  |
| NH-12     |                                           |                                        |
| 13        | 38.5                                      | 38.6                                   |
| 14        | 27.3                                      | 27.3                                   |
| 15        | 25.6                                      | 25.7                                   |
| 16        | 39.4                                      | 39.3                                   |
| NH-17     |                                           |                                        |
| 18        | 169.1                                     | 169.1                                  |
| 19        | 133.0                                     | 133.0                                  |
| 20        | 133.1                                     | 133.1                                  |
| 21        | 59.4                                      | 59.4                                   |
| 22        | 13.0                                      | 13.0                                   |
| 1'        | 129.6                                     | 129.6                                  |

|                      |       |       |
|----------------------|-------|-------|
| 2', 6'               | 128.3 | 128.2 |
| 3', 5'               | 114.0 | 114.0 |
| 4'                   | 159.6 | 159.6 |
| 1''                  | 140.7 | 140.7 |
| 2'', 6''             | 129.9 | 129.9 |
| 3'', 5''             | 128.3 | 128.3 |
| 4''                  | 126.8 | 126.8 |
| OCH <sub>3</sub> -6  | 56.2  | 56.2  |
| OCH <sub>3</sub> -8  | 55.4  | 55.4  |
| OCH <sub>3</sub> -4' | 55.5  | 55.5  |

---

## IV. Asymmetric ESIPT Photocycloaddition

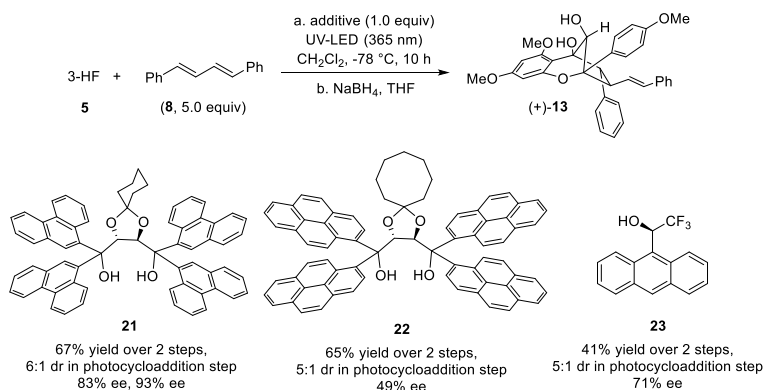

**Table S1. Select Conditions for Optimization of the Asymmetric Photocycloaddition**

| entry | time, temperature | light source         | solvent                         | chiral additive | yield, enantiomeric excess |
|-------|-------------------|----------------------|---------------------------------|-----------------|----------------------------|
| 1     | 12 h, -70 °C      | Rayonet              | PhMe/ <chem>CH2Cl2</chem> (1:2) | <b>21</b>       | 49% yield, 52% ee          |
| 2     | 12 h, -70 °C      | Rayonet              | PhMe/ <chem>CH2Cl2</chem> (1:2) | <b>22</b>       | 51% yield, 45% ee          |
| 3     | 12 h, -70 °C      | Rayonet              | <chem>CH2Cl2</chem>             | <b>21</b>       | 56% yield, 69% ee          |
| 4     | 12 h, -70 °C      | Rayonet              | <chem>CH2Cl2</chem>             | <b>23</b>       | 30% yield, 49% ee          |
| 5     | 2 h, -30 °C       | Rayonet<br>Photoflow | <chem>CH2Cl2</chem>             | <b>21</b>       | 67% yield, 31% ee          |
| 6     | 10 h, -78 °C      | UV-LED               | <chem>CH2Cl2</chem>             | <b>22</b>       | 65% yield, 49% ee          |
| 7     | 10 h, -78 °C      | UV-LED               | PhMe/ <chem>CH2Cl2</chem> (1:2) | <b>21</b>       | 31% yield, 71% ee          |
| 8     | 10 h, -78 °C      | UV-LED               | <chem>CH2Cl2</chem>             | <b>21</b>       | 67% yield, 83% ee          |
| 9     | 10 h, -78 °C      | UV-LED               | <chem>CH2Cl2</chem>             | <b>23</b>       | 41% yield, 71% ee          |

**General procedure for asymmetric ESIPT photocycloaddition of 3-HF **5** with DPBD **8**:**

A flame-dried 100 mL photoreaction tube was charged with 3-hydroxyflavone **5** (50 mg, 0.15 mmol, 1 equiv), DPBD **8** (1.57 g, 7.61 mmol, 5 equiv) and 1.0 equivalent of hydrogen-bonding additive in 30 mL of dry CH<sub>2</sub>Cl<sub>2</sub> (0.005 M for 3-HF **5**). Subsequently, the reaction mixture was degassed by argon gas bubbling combined with sonication for 10 min. During degassing, the reaction mixture was placed in an ice bath to prevent solvent evaporation. In order to conduct low temperature photochemistry experiments, a UV-LED ( $\lambda_{\text{max}} = 365 \text{ nm}$ ) was used as light source and a special dewar flask with a transparent window was used as temperature control.<sup>55</sup> The dewar was filled with dry ice and isopropanol to cool the reaction to -78 °C and then the reaction tube was inserted into the dry ice bath. Due to the low solubility of DPBD **8** at -78 °C, the reaction mixture was diluted to 0.005 M instead of the previously described 0.03 M concentration. The reaction was then irradiated for 10 h. The solvent was concentrated *in vacuo* and redissolved in 10 mL of dry THF. Subsequently, NaBH<sub>4</sub> (29 mg, 0.76 mmol, 5 equiv) was then added to directly reduce the mixture. After 5 h, saturated NH<sub>4</sub>Cl (aq.) was added to the reaction mixture to quench the reaction. The reaction was extracted with EtOAc (30 mL × 3), washed with saturated NaCl (aq.) and dried with anhydrous Na<sub>2</sub>SO<sub>4</sub>. The filtrate was then concentrated *in vacuo* and was finally purified by column chromatography using a gradient of hexanes/EtOAc (20:1 to 10:1 to remove DPBD and hydrogen-bonding additive, then 8:1 to 3:1). Aglain derivative (+)-**13** was obtained as a white solid. The enantioselectivity was determine using analytical chiral HPLC.  $[\alpha]_{\text{D}}^{23} = +71.4^{\circ}$  ( $c = 1.0$ , CHCl<sub>3</sub>). (+)-**13** was further converted to (+)-**14** using the previously described method (*cf.* page S7).  $[\alpha]_{\text{D}}^{23} = +92.3^{\circ}$  ( $c = 1.0$ , CHCl<sub>3</sub>)

Chiral HPLC Analysis of aglain ( $\pm$ )-**13**: *Chiralcel OD* column with an isocratic mobile phase of isopropanol/hexanes (10:90), with a flow rate of 1.0 mL/min for 40 min.

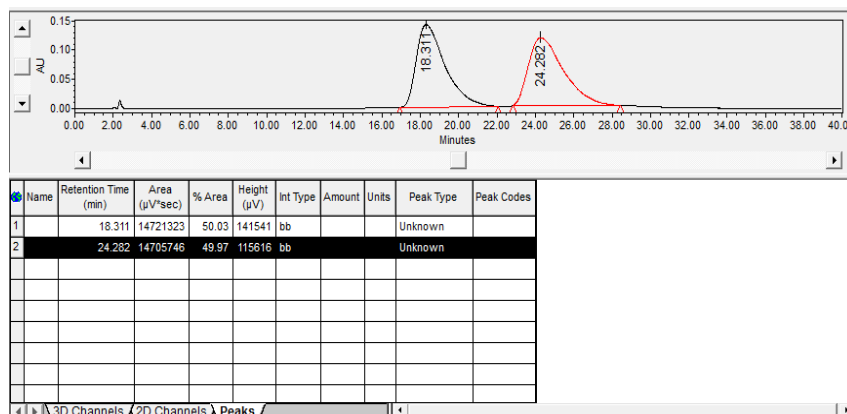

Chiral HPLC analysis of **13** obtained using TADDOL **21**:

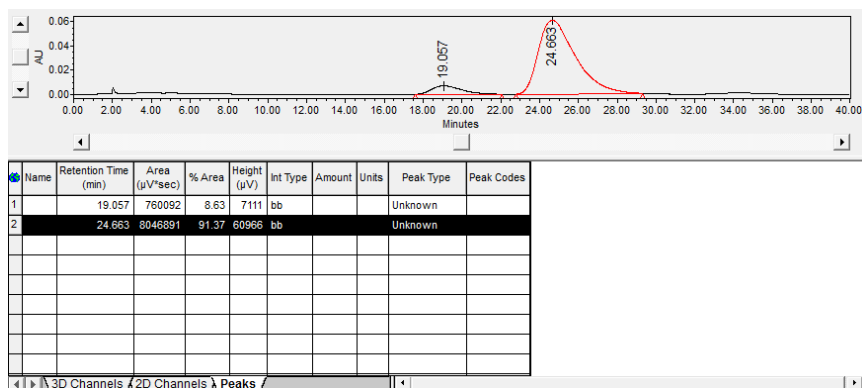

Enantiomeric excess after recrystallization of aglain (+)-**13** obtained from photoreaction with TADDOL **21**:

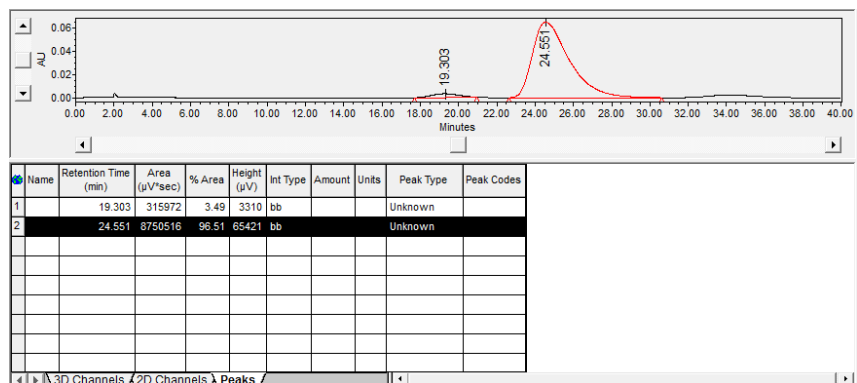

Chiral HPLC analysis of **13** obtained using TADDOL **22**:

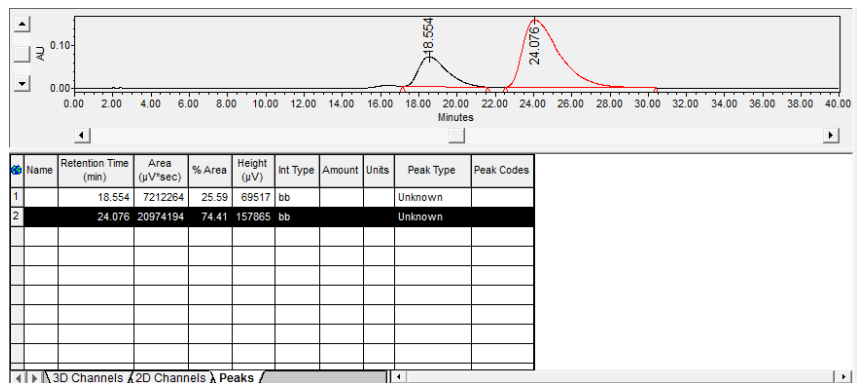



Chiral HPLC analysis of **13** obtained using Pirkle's alcohol **23**:

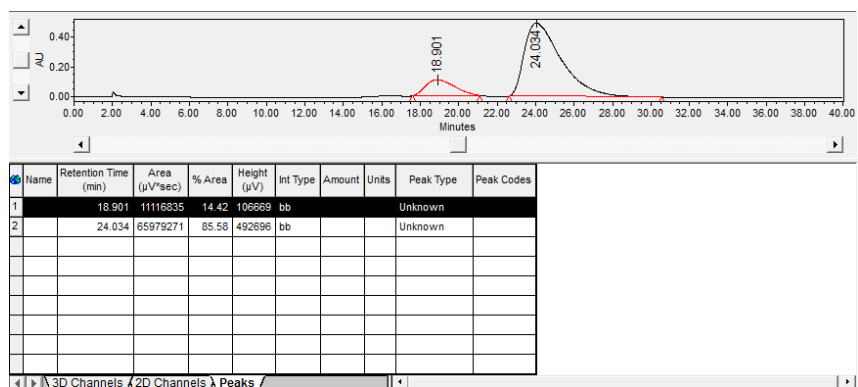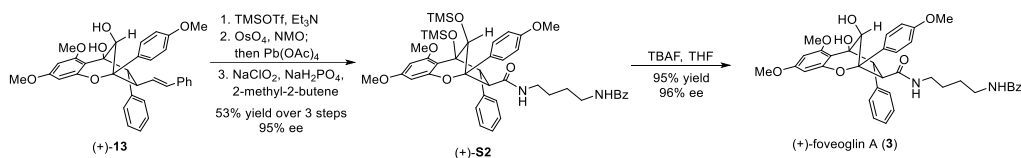

With (+)-**13** in hand, silylation, oxidative cleavage of the double bond, and oxidative amidation was performed using the previously described procedure (*cf.* page S9-S10) to furnish the core of foveoglin A in 53% yield and 95% ee,  $[\alpha]_D^{20} +43.1$  (c 0.1, CHCl<sub>3</sub>). Silyl group deprotection by TBAF provided us (+)-foveoglin A **3** in 95% yield and 96% ee,  $[\alpha]_D^{23} +25.3$  (c 0.16, CHCl<sub>3</sub>).

Chiral HPLC Analysis of aglain **S2**: *Chiralpak AD* column with an isocratic mobile phase of isopropanol/hexanes (5:95), with a flow rate of 1.0 mL/min for 40 min.

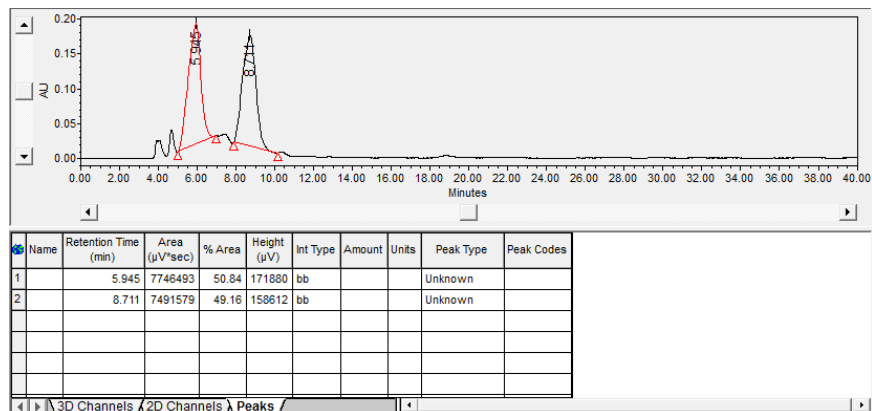

Enantiomeric excess of (+)-S2:

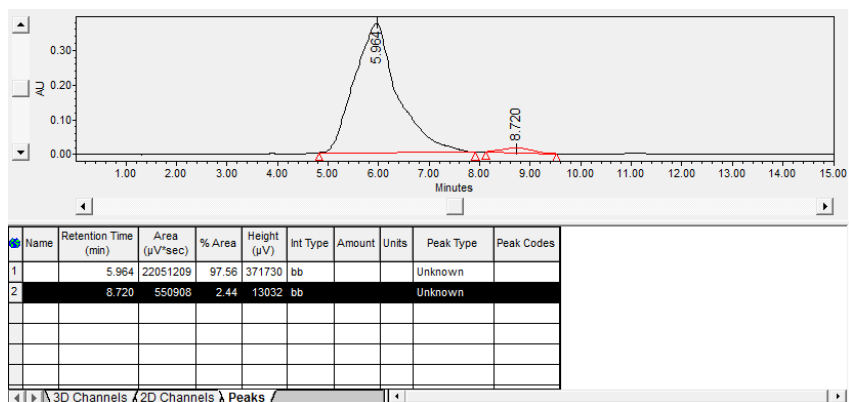

Chiral HPLC Analysis of (±)-foveoglin A 3: *Chiralpak AD* column with an isocratic mobile phase of isopropanol/hexanes (20:80), with a flow rate of 1.0 mL/min for 40 min.

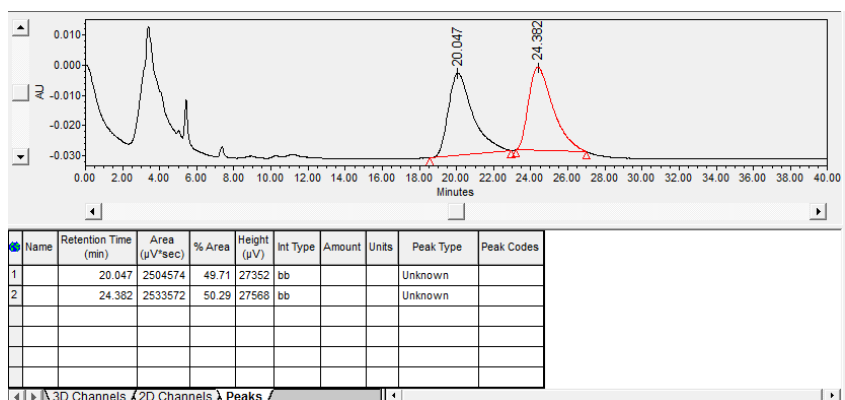

Enantiomeric excess of (+)-foveoglin A 3:

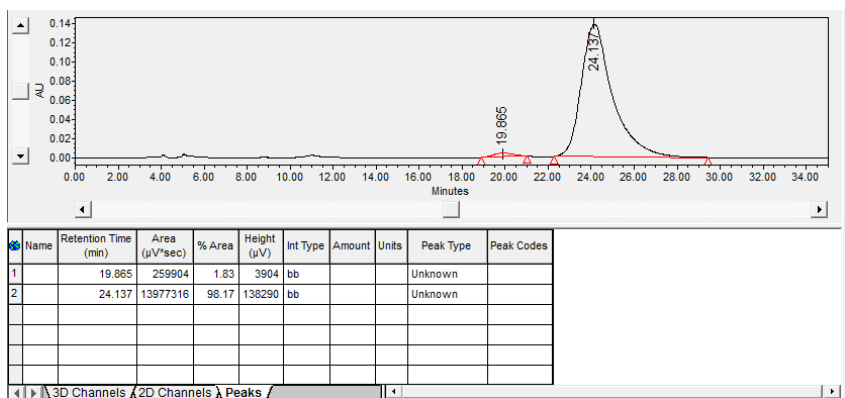

As phenanthrenyl or pyrenyl groups are incorporated in TADDOL additives **21** and **22**, UV-Vis absorption spectra were recorded.

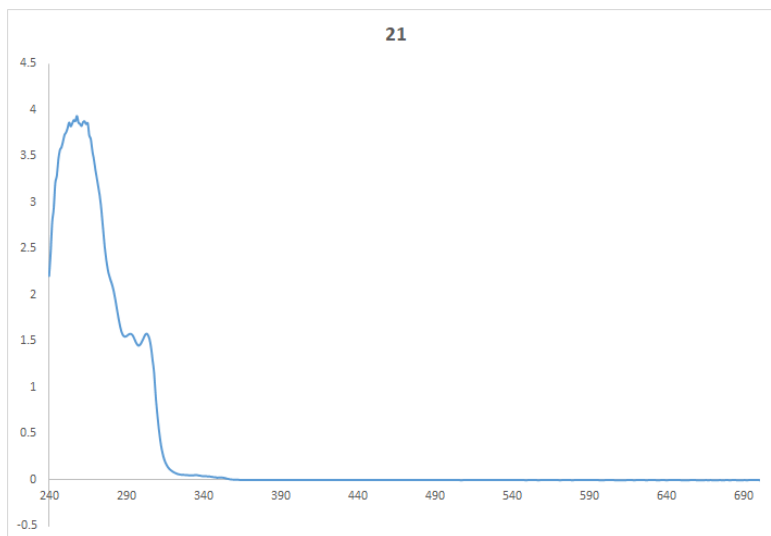

**Figure S1.** Absorption Spectrum of TADDOL **21**

(Concentration: 1.08 mM in  $\text{CHCl}_3$ )

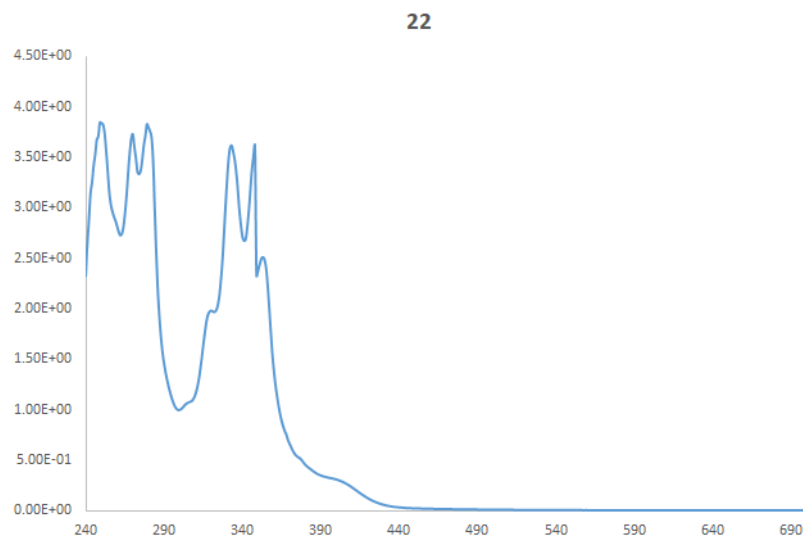

**Figure S2.** Absorption Spectrum of TADDOL **22**

(Concentration: 1.16 mM in  $\text{CHCl}_3$ )

From the absorption spectra, we can see that TADDOL **21** would not be photoexcited by 365 nm light; in comparison, TADDOL **22** could be photo excited by 365 nm light.

## Determination of absolute configuration of *para*-bromo benzoate (+)-**14** by VCD (vibrational circular dichroism):

### Experimental VCD:

VCD and IR spectra for (+)-**14** were recorded using a KBr pellet on a Bruker FT-IR TENSOR II spectrometer with  $8\text{ cm}^{-1}$  spectral resolution, polarization modulation efficiency set to  $1300\text{ cm}^{-1}$ , and a  $1900\text{ cm}^{-1}$  optical filter used to improve the signal-to-noise ratio. The VCD spectrum was collected from  $1950$  to  $800\text{ cm}^{-1}$  at six different orientations of the tablet in the holder, with a 20 minutes acquisition time for each orientation. An averaged spectrum was calculated for the six orientations.

### Predicted VCD:

Theoretical VCD calculations were performed using the “VCD Workflow” in Schrodinger, Inc.’s Maestro software.<sup>5,6</sup> Conformers were generated *via* a Macromodel conformational search (force field: OPLS 2005, mixed torsional/low-mode sampling, 5 kcal/mol MM energy window) followed by quantum mechanical screening for conformer retention (0.5 Angstrom deviation, 5.0 kcal/mol QM energy window), followed by DFT geometry optimizations (B3LYP/LACVP\*\*) and VCD/IR spectrum predictions on the retained conformers. DFT calculations were performed in the absence of solvent. From the VCD Workflow module, seven conformers were obtained with final gas phase energies within 2.7 kcal/mol of the lowest energy conformer. The conformers and their gas phase energies are depicted in **Figure S3**. Due to the highly rigid fused bicyclic structure of **14**, the differences in conformers mainly arose from bond rotations at the aryl methoxy groups and the styrenyl substituent. The VCD workflow was also repeated on the enantiomer of **14**, with seven similar enantiomeric conformers also obtained (*not shown*). Single-point energy calculations with vibrational frequencies and VCD prediction were then performed on the enantiomeric sets of seven conformers querying alternative functional and basis set combinations. It was determined that B3PW91/TZV\*\* gave the best agreement with the experimental IR/VCD spectra with respect to signal location and intensities.

### VCD Analysis:

Following the DFT calculations, average computed VCD and IR spectra for the seven output conformers (B3PW91/TZV\*) were generated using Boltzmann weighting based on calculated gas phase energies, with a Lorentzian line shape

at  $8\text{ cm}^{-1}$  resolution.<sup>7</sup> For the purpose of visual comparison, the experimental IR and VCD intensities have been scaled by 1,000-fold and 10,000-fold, respectively, and the predicted IR and VCD frequencies have been offset by  $-20.0\text{ cm}^{-1}$ , based on a direct comparison of the predicted and experimental IRs (**Figure S2A/B**).<sup>58</sup> A qualitative assessment of the measured vs. predicted VCD spectra for **14** (**Figure S2C/D**) and **ent-14** (**Figure S2E/F**) strongly supports the assignment of absolute stereochemistry for **14**.

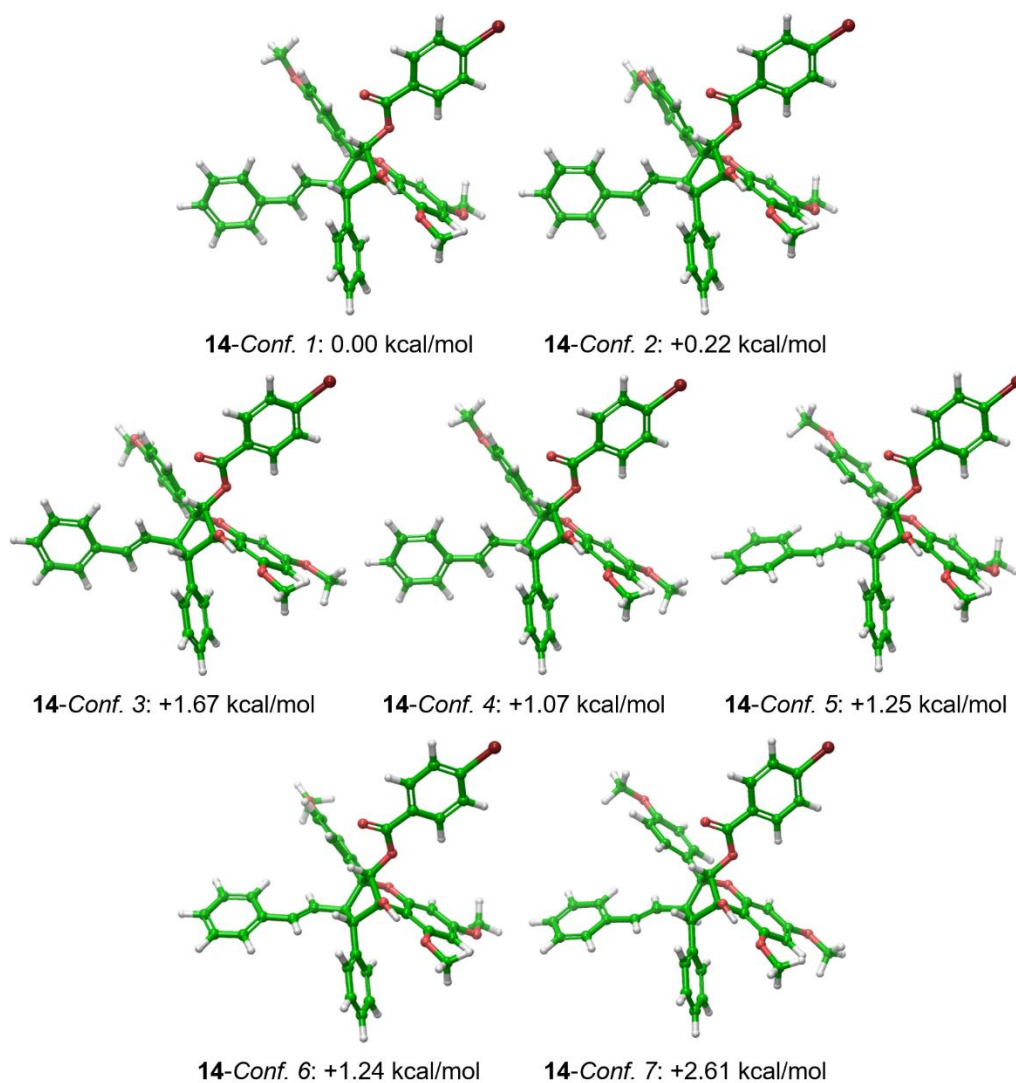

**Figure S3.** Seven conformers and relative gas phase energies (B3PW91/TZV\*\*) obtained for compound **14** using Schrodinger's Jaguar VCD workflow.

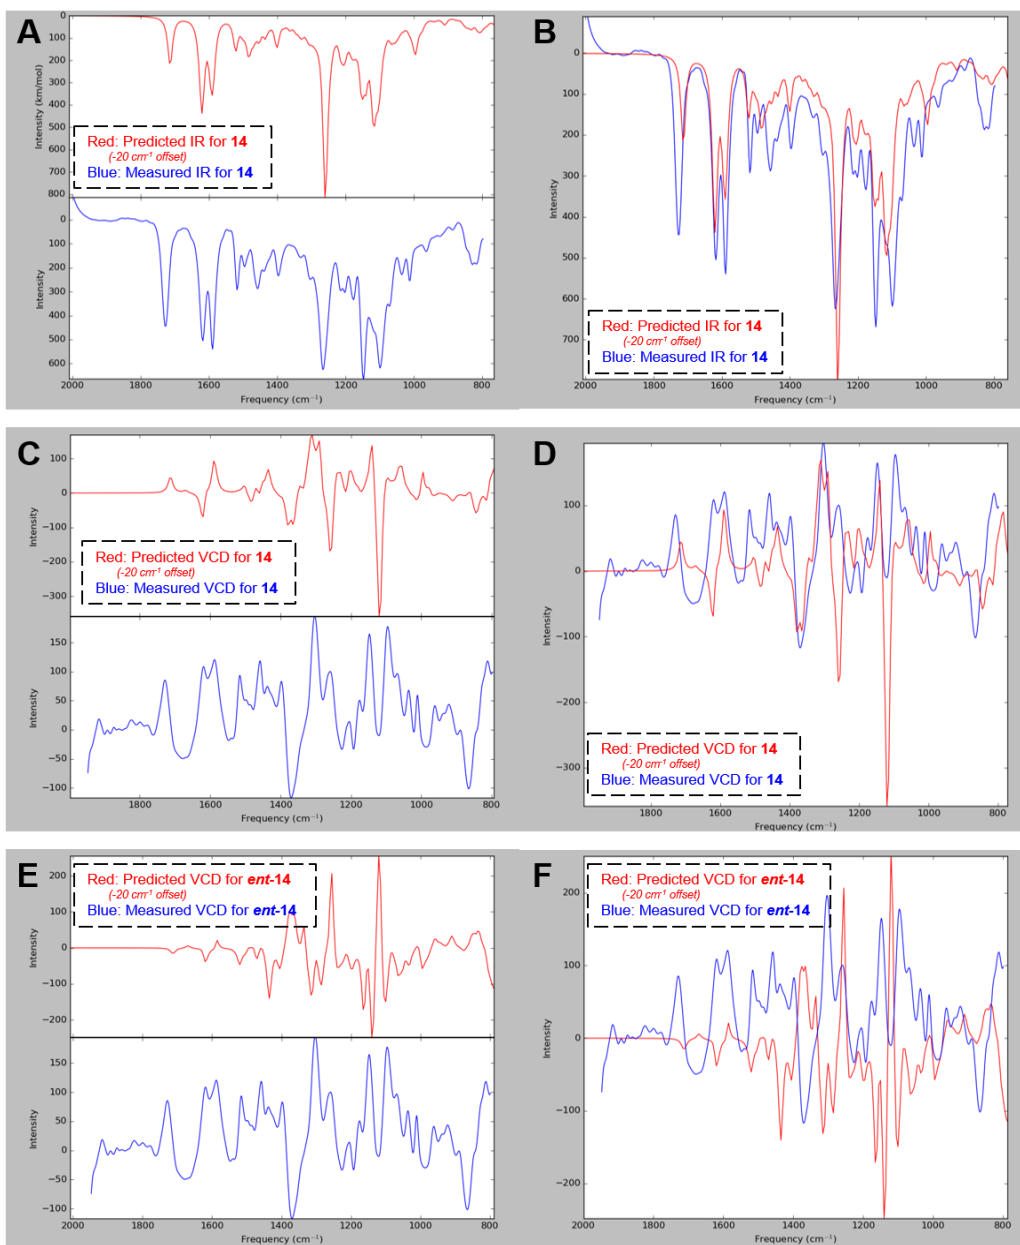

**Figure S4.** Predicted (red) and measured (blue) IR and VCD spectra comparisons for **14** and *ent-14*. All predicted spectra are offset by 20  $\text{cm}^{-1}$  based on the IR comparisons. **A)** IR comparisons, stacked; **B)** IR comparisons, overlaid; **C)** VCD comparisons for **14**, stacked; **D)** VCD comparisons for **14**, overlaid; **E)** VCD comparisons for *ent-14*, stacked; **F)** VCD comparisons for *ent-14*, overlaid.

## V. Mechanistic Studies

### (1) Photophysical Measurements:

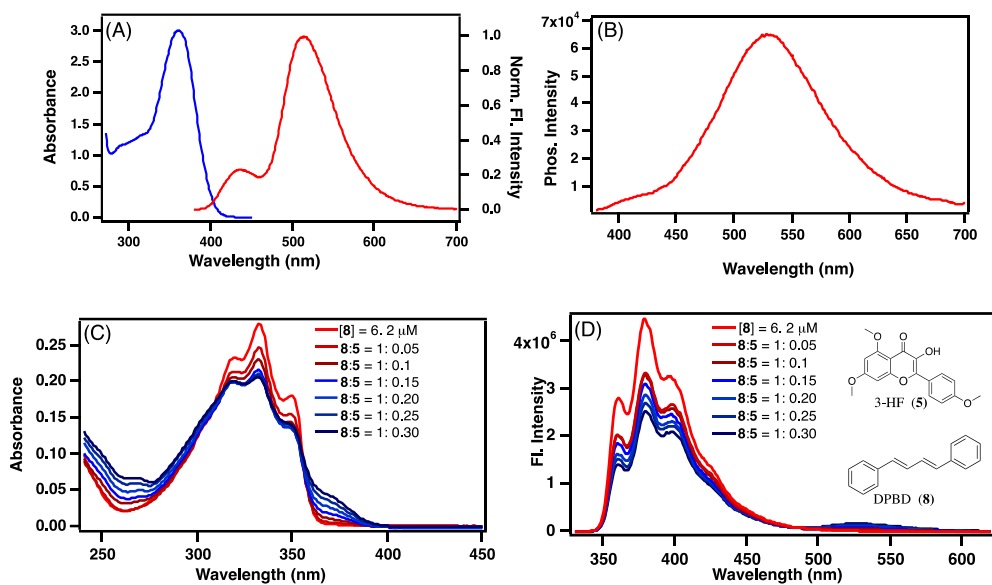

**Figure S5.** Photophysical Studies to Probe Excited State Reactivity of 3-Hydroxyflavone **5**. **A**) Absorbance (*blue*) of **5** in 2,2,2-trifluoroethanol (TFE) [**5**] = 2.35 μM. Fluorescence (*red*) of **5** in TFE with  $\lambda_{exc}$ =360 nm. **B**) Phosphorescence of **5** recorded in TFE glass,  $\lambda_{exc}$ =360 nm. **C**) Absorbance of **8** (6.2 M) with addition of **5** at various equivalents (0 to 1.9 μM) recorded in a mixture of CHCl<sub>3</sub>:EtOH (7:3) **D**) Fluorescence of **8** with addition of **5** at various equivalents (0 to 1.9 M) recorded in a mixture of CHCl<sub>3</sub>:EtOH (7:3);  $\lambda_{exc}$ =320 nm;  $\lambda_{emiss}$ =330-620 nm.

Literature supports the ESIPt process for 3-hydroxyflavones. In polar protic solvents (*e.g.* trifluoroethanol), dual fluorescence emission (fluorescence of the normal state N centered at 439 nm and tautomer state T centered at 527 nm) was observed for **5** at both room temperature and 77 K (**Figure S5 A**). The phosphorescence spectrum of **5** recorded in TFE glass (**Figure S5 B**) shows a  $\lambda_{max}$  for phosphorescence emission (528 nm) indicating a triplet energy ( $E_T$ ) of 54.2 kcal/mol. Based on the fact that the singlet energy of DPBD ( $\lambda_{absorption} < 370$  nm,  $E_S > 77$  kcal/mol)<sup>S9</sup> is higher than the singlet energy of 3-HF **5** ( $\lambda_{emission} > 390$  nm,  $E_S < 73$  kcal/mol), transfer of the singlet energy of 3-HF **5** to the ground state of DPBD **8** is forbidden.

Based on a literature report,<sup>S10</sup> the triplet energy of DPBD is 42 kcal/mol, which indicate that the possibility of a triplet energy transfer mechanism cannot be ruled out when taking into consideration that the triplet energy of 3-HF **5** is 55 kcal/mol based on the  $\lambda_{max} = 520$  nm observed in the phosphorescence

spectrum of **5**. As the singlet state of normal and tautomeric forms of **5** are close (based on the fluorescence spectra; **Figure S5-A**), we expect their corresponding triplet states to be close to each other. Hence for calculating the feasibility of photo-induced transfer using Rehm-Weller equation<sup>S11</sup> from the triplet excited state (*cf.* **Section (3)**; **Page S38**), we will employed the observed phosphorescence (**Figure S5-B**) to calculate the triplet energy.

Based on the computed free energy from Rehm-Weller equation<sup>S11</sup> for **5** and **8** and the absorptivity of the reactants under the concentrations employed for photoreactions, deciphering the nature of the excited reactant initiating the (3+2) photocycloaddition became vital. To address this point, Absorption and emission studies were performed with **5** and **8** at varying concentrations (**Figure S5 C-D**). Examination of **Figure S5 C** shows that the structured absorption of **8** centered at 332 nm undergoes a hypochromic shift upon addition of **5** indicating that there is likely a distortion of diene geometry in the presence of **5**. Similarly, the fluorescence intensity of **8** centered at 379 nm was lowered upon addition of **5**. This is likely due to the reduction in the absorptivity (hypochromic effect) of **8** by addition of **5**. Additionally, rise of an emission band centered at 530 nm was observed which matched the emission of the phototautomer of **5** (*cf.* **Figure S5 A**). These observations indicated that upon excitation of the reaction mixture at 320 nm, both the diene **8** and the 3-hydroxyflavone **5** are excited.

We subsequently attempted to record the transient absorption of 3-hydroxyflavone **5** both in the presence and absence of various dipolarophiles. Chou, Itoh, and others have suggested that the transient absorption of the parent 3-hydroxyflavone is complicated by overlapping absorptions from both the singlet and triplet excited states of the normal and the photo-tautomerized species.<sup>S12</sup> Unfortunately, attempts to record transient absorptions of both **5** met with similar complications as previously investigated, namely the aforementioned overlapping absorptions of differing excited states not to mention the low stability of the 3-hydroxyflavone **5** under laser irradiation. These characteristics ruled out the use of transient absorption studies to gain useful information regarding the quenching of the presumed triplet excited states with various dipolarophiles.

## **(2) Selective UV photoexcitation experiments:**

As the absorption spectrum of DPBD **8** ( $\lambda_{\text{max}} = 329 \text{ nm}$ ) overlapped with the absorption spectrum of 3-hydroxyflavone ( $\lambda_{\text{max}} = 360 \text{ nm}$ ), identification of the excited species upon photo irradiation is crucial for the mechanistic study. From the measurements, we are able to determine an optical window for selective excitation of 3-HF **5** (**Figure S5 D**).



Choice of the appropriate light source (purple LED, 395 nm to 405 nm) to selectively irradiate 3-HF **5** served to help identify the reactant being excited during photocycloadditions. To ensure that upon this LED light source irradiation only 3-hydroxyflavone **5** is being photoexcited, we conducted fluorescence measurements at excitation wavelengths of both 385 nm and 390 nm. At 385 nm excitation, we still can see trace amount of fluorescence signal coming from DPBD, and however, at 395 nm excitation, only fluorescence of 3-HF **5** can be seen, which indicates that the selection of the light source will certify that only 3-hydroxyflavone can be photoexcited.

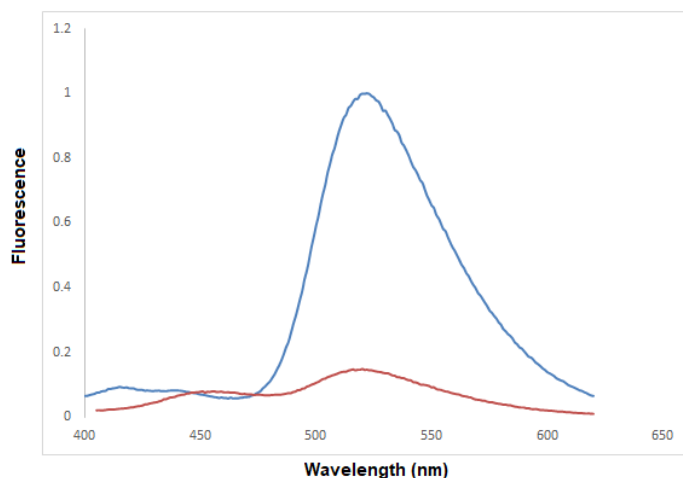

**Figure S6.** Fluorescence Spectra of a Mixture of 3-HF **5** and DPBD **8**

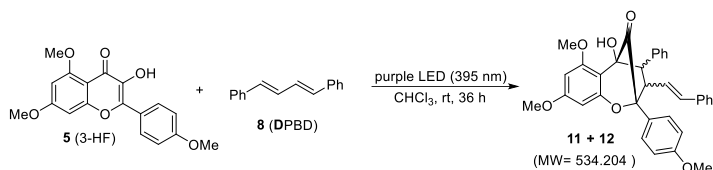

A flame dried test tube was charged with 3-HF **5** (30 mg, 0.09 mmol, 1 equiv.), DPBD **8** (94.3 mg, 0.46 mmol, 5 equiv), and CHCl<sub>3</sub>/TFE 7:3 mixture (4.5 mL, 0.02 M). The resulting mixture was degassed by argon bubbling with sonication for 15 min. Subsequently, the reaction tube was introduced into a purple LED chamber (395 nm) and was irradiated for 36 h. The reaction mixture was concentrated *in vacuo* and used for the UPLC analysis for detection of the photocycloadducts mass. The mass clearly showed the mass of the photocycloadducts as a hydrate. The relative long irradiation for the production of photocycloadducts also demonstrated the low absorption efficiency from the UV-absorption spectrum.

UPLC trace for the Purple LED reaction (photocycloadducts retention time: 2.04 min. Mass (M+1) of the photocycloadduct shown is 553.2 which is the hydrate of the bridgehead ketone:

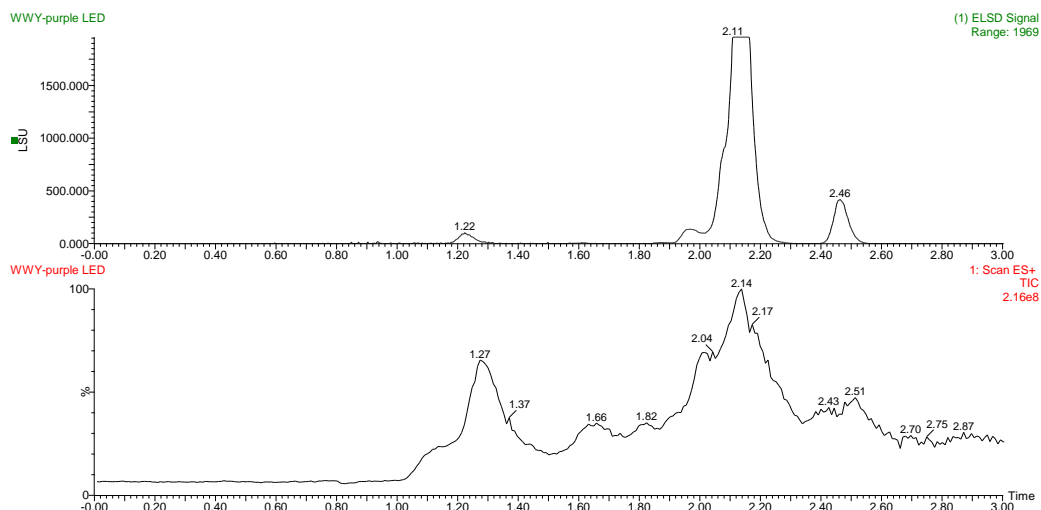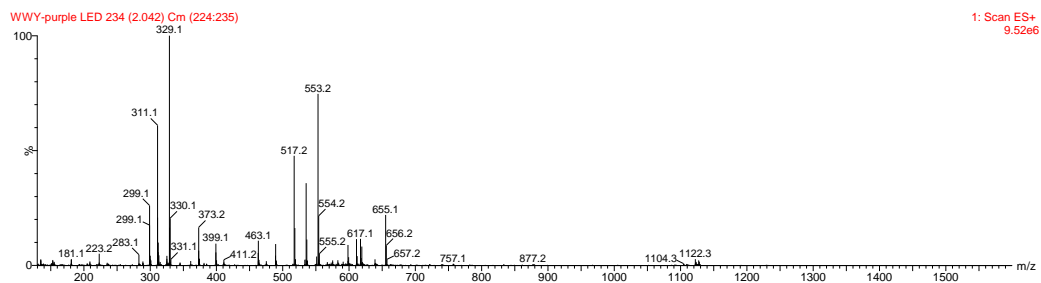

UPLC trace of a comparison experiment conducted under Rayonet irradiation as a control experiment (5 h):

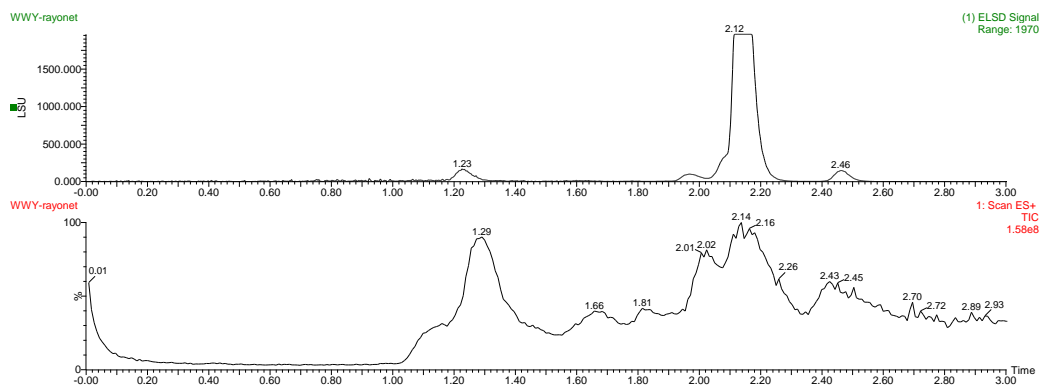

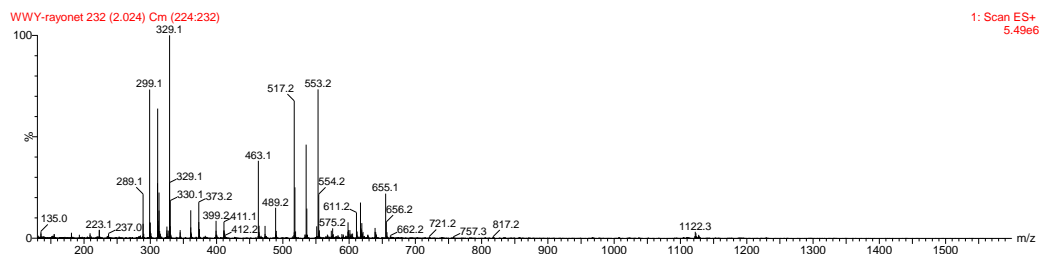

Although the efficiency of the photoreaction using purple-LED irradiation was significantly decreased (based on the absorption spectra, the absorption efficiency of 3-HF **5** at 395 nm is low), this experiment confirmed that upon photoirradiation, excitation of 3-HF **5** is crucial to produce photocycloadducts.

### (3) Studies of Photoinduced Electron Transfer (PET) Mechanism.

To study the photoinduced electron transfer mechanism, a calculation using the Rehm-Weller Equation was used to determine feasibility.

$$\Delta G^0 = E_{\text{ox}} - E_{\text{red}} - E_{00} - e^2/\epsilon d$$

$E_{\text{ox}}$  = oxidation potential of donor  
 $E_{\text{red}}$  = reduction potential of acceptor  
 $E_{00}$  = excitation Energy of donor  
 $\epsilon$  = dielectric constant of water  
 $d$  = distance between donor and acceptor

All redox values were taken in MeCN as the solvent. Glassy carbon was used as the working electrode for *trans-trans*-1,4-diphenyl-1,3-butadiene **8**, pentafluoro-DPBD **27**, and 3-hydroxyflavone (**5**). A platinum (Pt) electrode was used for **5**. The reference electrode employed was Ag/AgCl and Ag wire pseudo-electrode, respectively. Tertbutylammonium-hexafluorophosphate (TBAHFP) was used as the supporting electrolyte. In all cases, ferrocene was used as internal standard. The singlet (3.08 eV) and triplet (2.35 eV) state energies of energy of **5** were computed from the fluorescence and phosphorescence spectra, respectively.

**Table S2:** Concentrations used to obtain electrochemical data.

| Entry | Compound  | Conc. (mM) | Electrolyte (M) |
|-------|-----------|------------|-----------------|
| 1     | <b>5</b>  | 0.1        | 0.1             |
| 2     | <b>8</b>  | 1.65       | 0.07            |
| 3     | <b>27</b> | 0.67       | 0.88            |

**Table S3:** Redox potentials of compounds under investigation

| entry | Compound  | $E_{ox}$ (V) | $E_{red}$ (V) |
|-------|-----------|--------------|---------------|
| 1     | <b>5</b>  | 1.22         | -1.79         |
| 2     | <b>8</b>  | 1.38         | -0.96         |
| 3     | <b>27</b> | 1.49         | -0.90         |

**Table S4:** Free energy of electron transfer from triplet excited **5** as donor ( $E_{exc} = 2.35$  eV;  $E_{D/D^+} = 1.22$ )

| entry | Acceptor  | $E(A/A^-)$ (V) | $\Delta G$ (eV) | $\Delta G$ (kcal/mol) |
|-------|-----------|----------------|-----------------|-----------------------|
| 1     | <b>8</b>  | -0.96          | -0.23           | -5.3                  |
| 2     | <b>27</b> | -0.90          | -0.28           | -6.6                  |

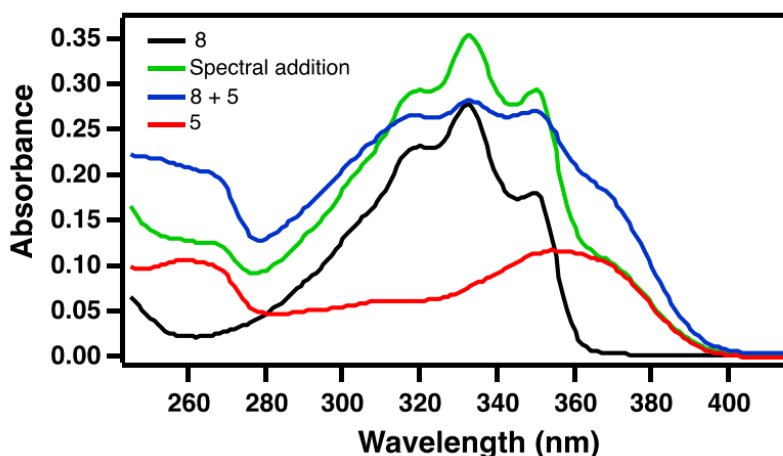**Figure S7.** Absorption Spectra of a Mixture of 3-HF **5** and DPBD **8** in Comparison with Mathematically Added Spectrum

The absorption spectra of **8** (black), **5** (red) and a mixture of **8** and **5** (blue) along with the spectral addition of **8** and **5** (green) shows that there is no new electron donor-acceptor (EDA) complex formation (or at the very least the complex does not have sufficient absorptivity) under our experimental conditions (**Figure S7**). Nevertheless, the spectral addition (green) and experimental absorption of the mixture of **8** and **5** (blue) cannot rule out the interaction between **8** and **5** due to the change in absorptivity. Based on this, electron donor-acceptor (EDA) complex between **5** and **8** in the ground state is not observable under our experimental conditions *i.e.* no new complex was observed spectrophotometrically. In addition, the electron transfer pathway is initiated

from the triplet excited state of **5** leading to the observed photoproduct. Our data does not demonstrate an emissive EDA formation. However, we cannot rule out a non-emissive EDA.

#### (4) Further studies of the ESIPT photocycloaddition of **5** with other substituted dipolarophiles.

To further study the ESIPT photocycloaddition of 3-HF **5** with diphenylbutadienes, we synthesized several additional substituted dipolarophiles. Evaluation of these dipolarophiles in the photoreaction should impart understanding regarding the electronic effects of the ESIPT photocycloaddition and serve to elucidate additional donor-acceptor effects.

#### Synthetic route to substituted stilbenes or diphenylbutadienes:

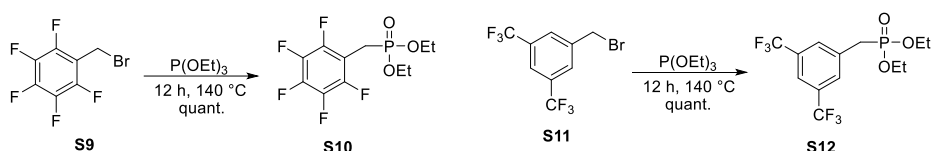

The phosphate derivatives **S10** and **S12** were prepared by reactions of benzyl bromide **S9** and **S11** (1 equiv.) with triethyl phosphite (3 equiv.) at 140 °C for 12 h. The remaining phosphite was removed under reduced pressure and the phosphate products were used in the subsequent olefination without further purification.<sup>S13</sup>

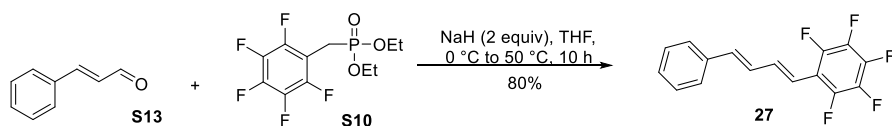

A flame-dried round bottom flask was charged with pentafluorobenzyl phosphate **S10** (5g, 15.71 mmol, 1 equiv) and dry THF (105 mL, 0.15 M). The solution was cooled to 0 °C before NaH (60% in mineral oil, 1.26 g, 31.43 mmol, 2 equiv) was added. After stirring for 5 min, cinnamaldehyde **S13** (2.08 g, 15.71 mmol, 1 equiv) was added. The resulting mixture was allowed to warm to room temperature and was subsequently heated to 50 °C for 10 h. The reaction mixture was then poured into ice-cooled saturated NH<sub>4</sub>Cl (aq.). After extraction with CH<sub>2</sub>Cl<sub>2</sub>, the combined organic layer was washed with saturated NaCl (aq.), dried over anhydrous Na<sub>2</sub>SO<sub>4</sub>, and concentrated *in vacuo*. Further purification *via* recrystallization in EtOAc afforded DPBD **27** as a white solid (3.72 g, 80% yield). Characterization data for this compound are in agreement with a previous

report.<sup>S14</sup>

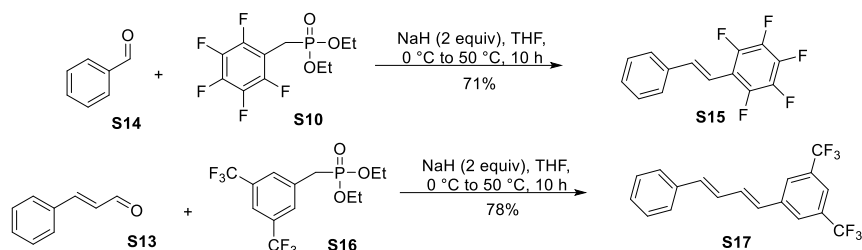

Using a similar synthetic strategy, dipolarophiles **S15** and **S17** were synthesized. Characterization data for these compounds were in agreement with previous reports.<sup>S15, S16, S17, S18</sup>

### General procedure for mechanistic validation reactions:

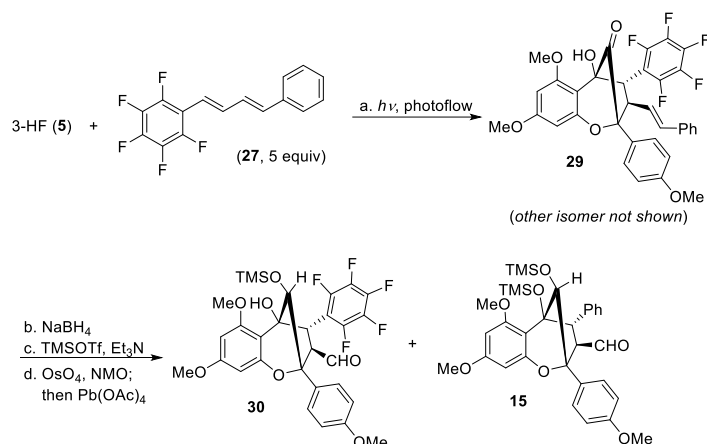

A 100 mL round bottom flask was charged with 3-hydroxyflavone **5** (300 mg, 0.91 mmol, 1 equiv), pentafluoro-DPBD **27** (1.35 g, 4.6 mmol, 5 equiv), and 90 mL of CH<sub>2</sub>Cl<sub>2</sub> (0.01 M for 3-HF **5**). The flask was connected with the continuous photoflow reactor followed by degassing of the reaction at 0 °C with argon bubbling for 5 min with sonication. Subsequently, the peristaltic pump was turned on to circulate the reaction mixture and argon bubbling with sonication was continued for an additional 15 min before the UV-lamp (Rayonet, λ<sub>max</sub> = 350 nm) was turned on. After 6 h, the reaction mixture was collected back into the flask and was concentrated *in vacuo*. Purification *via* flash chromatography using a gradient of hexanes/EtOAc (10:1 to 3:1) afforded the cyclopenta[bc]benzopyran products as a mixture of isomers (cycloadducts were identified based on a <sup>1</sup>H NMR spectrum of the crude product) which were used in the next step without further purification. A flame-dried 100 mL flask was charged with the mixture of compounds (338 mg, 0.54 mmol, 1 equiv) and THF (4 mL, 0.14 M) was added. Subsequently, NaBH<sub>4</sub> (123 mg, 3.25 mmol, 6 equiv) was added at rt in one portion. The resulting mixture was then stirred for 12 h and was quenched with ice-cooled saturated ammonium chloride. The mixture was extracted with CH<sub>2</sub>Cl<sub>2</sub> (10 mL × 3), washed with saturated sodium

bicarbonate, and dried over sodium sulfate. The filtrate was concentrated *in vacuo*. Column chromatography purification using hexanes/EtOAc (5:1 to 3:1) afforded an inseparable mixture of aglain products (321.6 mg), which was redissolved in CH<sub>2</sub>Cl<sub>2</sub> (5 mL) and cooled to -78 °C. Subsequently, Et<sub>3</sub>N (188 μL, 1.35 mmol, 2.5 equiv) and TMSOTf (210 μL, 1.14 mmol, 2.1 equiv) were added. The resulting mixture was stirred at -78 °C for an additional 10 min and was then warmed to 0 °C for another 20 min before 10 mL of saturated Na<sub>2</sub>CO<sub>3</sub> (aq.) was added to quench the reaction. The reaction mixture was further extracted with CH<sub>2</sub>Cl<sub>2</sub> (3 mL × 3). The combined organic layer was washed with 10 mL saturated NaCl (aq.), dried over anhydrous Na<sub>2</sub>SO<sub>4</sub>, and concentrated *in vacuo*. Subsequently, the crude compound mixture was redissolved in 13 mL of THF/*t*-BuOH (1:1). Subsequently, 1.3 mL OsO<sub>4</sub> (10 mg/mL, aq., 0.1 equiv) solution was added followed by addition of NMO (190 mg, 1.62 mmol, 3 equiv). The resulting mixture was stirred at room temperature for 12 h, before being extracted with Et<sub>2</sub>O (5 mL × 3). The combined organic layers were washed with saturated NaCl (aq.), dried over anhydrous Na<sub>2</sub>SO<sub>4</sub>, and concentrated *in vacuo*. The obtained brown oil was redissolved in CH<sub>2</sub>Cl<sub>2</sub> (5 mL) and Pb(OAc)<sub>4</sub> (360 mg, 0.81 mmol, 1.5 equiv) was added. The reaction mixture was stirred at room temperature for 20 min before 10 mL of saturated Na<sub>2</sub>S<sub>2</sub>O<sub>3</sub> (aq.) was added to quench the reaction. The reaction mixture was extracted with CH<sub>2</sub>Cl<sub>2</sub> (5 mL × 3), washed with 10 mL saturated NaCl (aq.), dried over anhydrous Na<sub>2</sub>SO<sub>4</sub>, and concentrated *in vacuo*. Purification *via* column chromatography purification using hexanes/EtOAc (20:1 to 6:1) afforded pentafluoro-aglain aldehyde **30** (126 mg, 25% overall yield) as a colorless oil and aldehyde **15** (45.3 mg, 8.2 % overall yield) (for characterization data for **15**, see page S9).

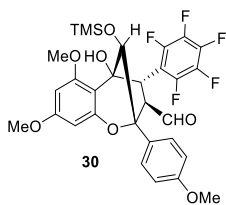

**30**: R<sub>f</sub>: 0.37 (EtOAc/hexanes = 1:4). <sup>1</sup>H NMR (500 MHz, CDCl<sub>3</sub>) δ 9.01 (d, J = 1.5 Hz, 1H), 7.50 (d, J = 8.9 Hz, 2H), 6.98 (d, J = 8.9 Hz, 2H), 6.30 (d, J = 1.1 Hz, 1H), 5.97 (d, J = 1.1 Hz, 1H), 5.54 (s, 1H, OH), 4.55 (s, 1H), 4.34 (d, J = 4.7 Hz, 1H), 4.01 (dd, J<sub>1</sub> = 4.7 Hz, J<sub>2</sub> = 1.5 Hz, 1H), 3.83 (s, 3H), 3.80 (s, 3H), 3.48 (s, 3H), 0.002 (s, 9H); <sup>13</sup>C NMR (125 MHz, CDCl<sub>3</sub>) δ 198.0, 160.9, 159.6, 158.9, 154.3,

147.6, 145.2, 138.5, 136.0, 127.9, 127.4, 114.2, 111.0, 103.8, 94.3, 92.5, 84.4, 81.4, 73.6, 58.5, 55.8, 55.32, 55.30, 44.2, 0.6; IR  $\nu_{\text{max}}$  (film): 3497, 2959, 1720, 1619, 1496, 1378, 1253, 1149, 1098, 1098, 1029, 875, 841 cm<sup>-1</sup>. HRMS-ESI (m/z) calculated [M+H]<sup>+</sup> C<sub>30</sub>H<sub>29</sub>F<sub>5</sub>O<sub>7</sub>Si, 647.2969, found 647.2970.

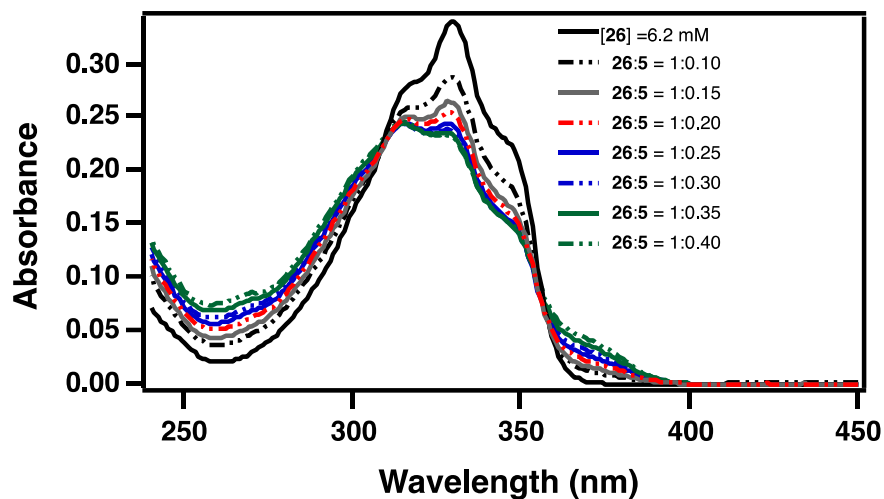

**Figure S8.** Absorbance of **27** (6.2  $\mu\text{M}$ ) with addition of **5** (0 to 2.5  $\mu\text{M}$ ) at various equivalence recorded in a mixture of  $\text{CHCl}_3$ :EtOH (7:3)

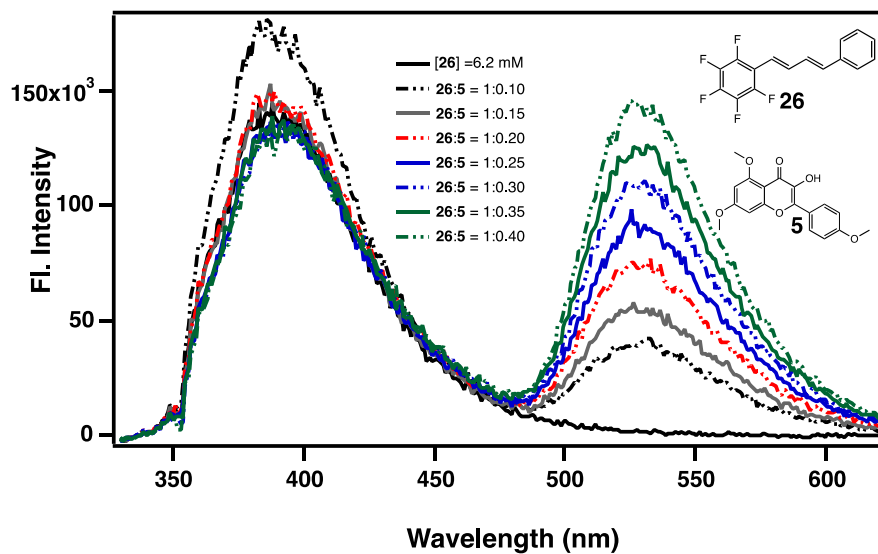

**Figure S9.** Fluorescence of **27** with addition of **5** at various equivalents (0 to 2.5  $\mu\text{M}$ ) recorded in a mixture of  $\text{CHCl}_3$ :EtOH (7:3);  $\lambda_{\text{exc}} = 320 \text{ nm}$ ;  $\lambda_{\text{emiss}} = 330 - 620 \text{ nm}$ .

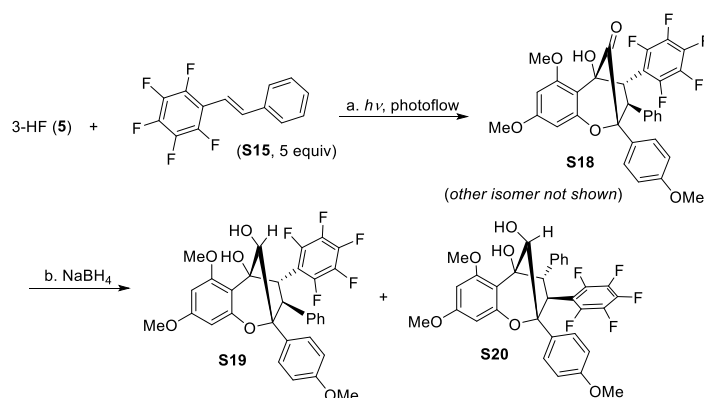

The previously mentioned general procedure for mechanistic validation



reactions was employed using 3-HF **5** (300 mg, 0.91 mmol, 1 equiv.) and stilbene **S15** (1.23 g, 4.6 mmol, 5 equiv.). After photocycloaddition, the inseparable mixture was purified *via* flash column chromatography using a gradient of hexanes/EtOAc (10:1 to 3:1) to afford 252 mg of a white solid. The crude product was reduced with NaBH<sub>4</sub> (96 mg, 2.52 mmol, 6 equiv.) in THF. Purification *via* flash column chromatography using a gradient of hexanes/EtOAc (9:1 to 4:1) afforded a mixture of compounds **S19** and **S20**. The mixture was further purified *via* preparative thin layer chromatography using hexanes/EtOAc/CH<sub>2</sub>Cl<sub>2</sub> (7:1.5:1.5) afforded compound **S19** (142 mg, 26 % overall yield) as a white solid and **S20** (51 mg, 9.3 % overall yield) as a colorless oil.

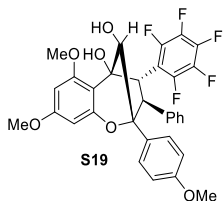

**S19**: R<sub>f</sub>: 0.13 (EtOAc/hexanes = 3:7). m.p. = 224 - 225 °C (CH<sub>2</sub>Cl<sub>2</sub>). <sup>1</sup>H NMR (500 MHz, CDCl<sub>3</sub>) δ 7.31 (d, J = 8.7 Hz, 2H), 7.01 (t, J = 7.2 Hz, 2H), 6.95 (t, J = 7.2 Hz, 1H), 6.90 (d, J = 7.2 Hz, 2H), 6.68 (d, J = 8.7 Hz, 2H), 6.31 (d, J = 2.1 Hz, 1H), 6.04 (d, J = 2.1 Hz, 1H), 5.63 (s, 1H, OH), 4.92 (d, J = 3.3 Hz, 1H), 4.39 (d, J = 10.6 Hz, 1H), 4.10 (d, J = 10.6 Hz, 1H), 3.80 (s, 3H), 3.69 (s, 3H), 3.51 (s, 3H), 2.63 (brs, 1H, OH); <sup>13</sup>C NMR (125 MHz, CDCl<sub>3</sub>) δ 161.3, 159.3, 158.8, 154.4, 147.5, 140.7, 139.3, 138.2, 136.2, 129.0, 128.9, 128.5, 128.2, 126.8, 113.2, 110.8, 102.8, 94.6, 92.8, 87.7, 81.5, 73.0, 55.7, 55.5, 55.1, 54.5, 54.3; IR  $\nu_{\max}$  (film): 3495, 2944, 1713, 1617, 1519, 1493, 1375, 1146, 1097, 998, 828, 701, 652 cm<sup>-1</sup>. HRMS-ESI (m/z) calculated [M+H]<sup>+</sup> C<sub>32</sub>H<sub>26</sub>F<sub>5</sub>O<sub>6</sub>, 601.1650, found 601.1659.

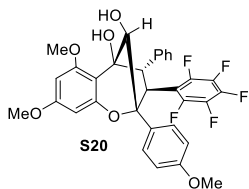

**S20**: R<sub>f</sub>: 0.13 (EtOAc/hexanes = 3:7). <sup>1</sup>H NMR (500 MHz, CDCl<sub>3</sub>) δ 7.45 (d, J = 8.6 Hz, 2H), 7.19 (m, 3H), 7.00 (m, 2H), 6.80 (d, J = 8.6 Hz, 2H), 6.28 (d, J = 2.2 Hz, 1H), 5.89 (d, J = 2.2 Hz, 1H), 5.48 (s, 1H, OH), 5.17 (s, 1H), 4.45 (d, J = 10.9 Hz, 1H), 3.79 (s, 3H), 3.76 (s, 3H), 3.74 (d, J = 10.9 Hz, 1H), 3.10 (s, 3H); <sup>13</sup>C NMR (125 MHz, CDCl<sub>3</sub>) δ 161.0, 160.3, 159.4, 153.2, 145.4, 143.4, 140.8, 138.3, 135.9, 135.4, 128.7, 128.1, 127.9, 127.5, 144.0, 113.5, 103.1, 94.3, 93.2, 86.6, 82.2, 72.1, 58.7, 55.43, 55.37, 55.21, 55.16, 45.7; IR  $\nu_{\max}$  (film): 3498, 2960, 2843, 1722, 1619, 1589, 1518, 1383, 1378, 1174, 1134, 1100, 1027, 875, 844 cm<sup>-1</sup>. IR  $\nu_{\max}$  (film): 3495, 2944, 1713, 1617, 1519, 1493, 1375, 1146, 1097, 998, 828, 701, 652 cm<sup>-1</sup>. HRMS-ESI (m/z) calculated [M+H]<sup>+</sup> C<sub>32</sub>H<sub>26</sub>F<sub>5</sub>O<sub>6</sub>, 601.1650, found 601.1655.

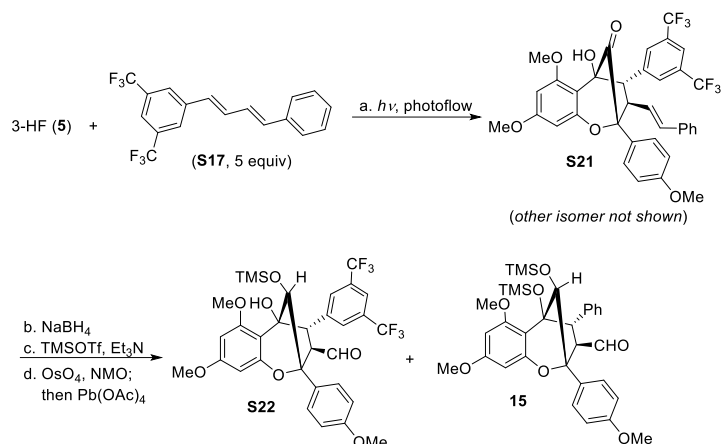

The previously mentioned general procedure for mechanistic validation reactions was employed using 3-HF **5** (300 mg, 0.91 mmol, 1 equiv.) and DPBD **S17** (1.56 g, 4.6 mmol, 5 equiv.). Aldehyde **S22** (132 mg, 22 % overall yield) was isolated as a colorless oil and compound **15** (39 mg, 7.5 % overall yield) was isolated as a minor product (for characterization data for **15**, see page S10).

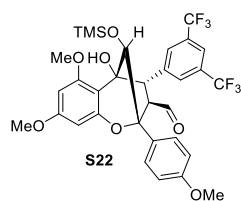

**S22**:  $R_f$ : 0.43 (EtOAc/hexanes = 1:4).  $^1\text{H NMR}$  (500 MHz,  $\text{CDCl}_3$ )  $\delta$  9.04 (d,  $J = 1.8$  Hz, 1H), 7.69 (s, 1H), 7.52 (d,  $J = 8.8$  Hz, 2H), 7.35 (s, 2H), 6.99 (d,  $J = 8.8$  Hz, 2H), 6.33 (d,  $J = 2.2$  Hz, 1H), 5.83 (d,  $J = 2.2$  Hz, 1H), 5.42 (s, 1H, OH), 4.59 (s, 1H, OH), 3.97 (d,  $J = 9.0$  Hz, 1H), 3.83 (s, 3H), 3.78 (s, 3H), 3.57 (dd,  $J_1 = 9$  Hz,  $J_2 = 1.8$  Hz, 1H), 3.14 (s, 3H), 0.01 (s, 9H);  $^{13}\text{C NMR}$  (125 MHz,  $\text{CDCl}_3$ )  $\delta$  197.6,

161.0, 159.6, 159.1, 153.0, 140.0, 130.8, 128.6, 127.7, 127.4, 124.3, 122.2, 120.7, 114.2, 103.5, 94.6, 94.5, 92.3, 84.2, 82.0, 74.4, 61.2, 55.4, 55.3, 55.2, 52.7, 0.6; IR  $u_{\text{max}}$  (film): 3498, 2960, 2843, 1722, 1619, 1589, 1518, 1383, 1378, 1174, 1134, 1100, 1027, 875, 844  $\text{cm}^{-1}$ . HRMS-ESI ( $m/z$ ) calculated  $[\text{M}+\text{H}]^+$   $\text{C}_{32}\text{H}_{33}\text{F}_6\text{O}_7\text{Si}_2$ , 671.1900, found 671.1906.

## VI. X-Ray Crystallographic Data

X-ray crystallographic data for compound **14**:

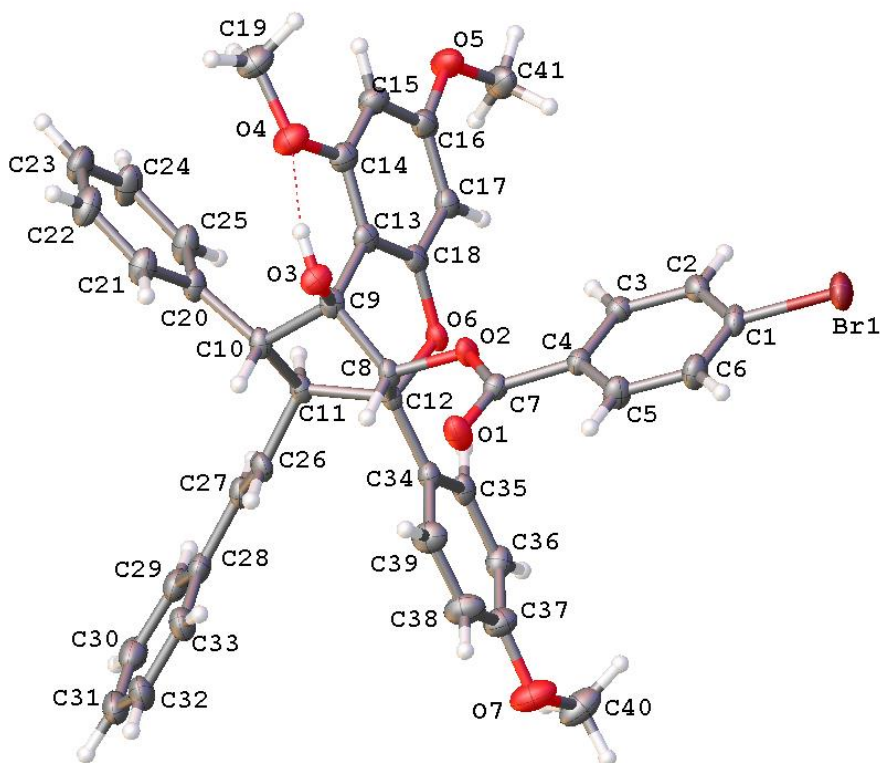

Crystals of compound **14** suitable for X-ray analysis were obtained by slow evaporation from dichloromethane/hexanes. Crystallographic data have been deposited with the Cambridge Crystallographic Data Centre (CCDC#1523489). Copies of the data can be obtained free of charge on application to the CCDC, 12 Union Road, Cambridge CB21EZ, UK (fax: (+44)-1223-336-033; e-mail: deposit@ccdc.cam.ac.uk).

### Computing details

Data collection: *APEX2* (Bruker, 2006); cell refinement: *SAINT* (Bruker, 2006); data reduction: *SAINT* (Bruker, 2006); program(s) used to solve structure: *SHELXS97* (Sheldrick, 1990); program(s) used to refine structure: *SHELXL* (Sheldrick, 2008); molecular graphics: *Olex2* (Dolomanov *et al.*, 2009); software used to prepare material for publication: *Olex2* (Dolomanov *et al.*, 2009).

### References

Sheldrick, G. M. (1996). *SADABS*. University of Göttingen, Germany.

Sheldrick, G. M. (1997). *SHELXL97*. University of Göttingen, Germany.

Bruker (2006). *SAINT*. Bruker Analytical X-ray Instruments Inc., Madison, Wisconsin, USA.

Bruker (2006). *APEX2*. Bruker Analytical X-ray Instruments Inc., Madison, Wisconsin, USA.

Dolmanov, O. V., *et al.* (2009). OLEX2: A complete structure solution, refinement and analysis program. *J. Appl. Cryst.* 42, 339-341 (2009).

### (Compound 14)

#### *Crystal data*

|                                 |                                                         |
|---------------------------------|---------------------------------------------------------|
| $C_{41}H_{35}BrO_7$             | $F(000) = 2976$                                         |
| $M_r = 719.60$                  | $D_x = 1.411 \text{ Mg m}^{-3}$                         |
| Monoclinic, $P2_1/c$            | Cu $K\alpha$ radiation, $\lambda = 1.54178 \text{ \AA}$ |
| $a = 22.603 (2) \text{ \AA}$    | Cell parameters from 9408 reflections                   |
| $b = 20.3183 (19) \text{ \AA}$  | $\theta = 3.9\text{--}66.7^\circ$                       |
| $c = 14.8174 (13) \text{ \AA}$  | $\mu = 2.08 \text{ mm}^{-1}$                            |
| $\beta = 95.493 (4)^\circ$      | $T = 100 \text{ K}$                                     |
| $V = 6773.6 (11) \text{ \AA}^3$ | Bar, colorless                                          |
| $Z = 8$                         | $0.22 \times 0.09 \times 0.08 \text{ mm}$               |

#### *Data collection*

|                                                                   |                                                                        |
|-------------------------------------------------------------------|------------------------------------------------------------------------|
| Bruker Proteum-R diffractometer                                   | 11948 independent reflections                                          |
| Radiation source: rotating anode                                  | 10807 reflections with $I > 2\sigma(I)$                                |
| Multilayer monochromator                                          | $R_{\text{int}} = 0.055$                                               |
| $\phi$ & $\omega$ scans                                           | $\theta_{\text{max}} = 66.8^\circ$ , $\theta_{\text{min}} = 2.0^\circ$ |
| Absorption correction: multi-scan <i>SADABS</i> (Sheldrick, 1997) | $h = -26 \rightarrow 26$                                               |
| $T_{\text{min}} = 0.646$ , $T_{\text{max}} = 0.753$               | $k = -24 \rightarrow 24$                                               |
| 133915 measured reflections                                       | $l = -17 \rightarrow 17$                                               |

#### *Refinement*

|                            |                                                          |
|----------------------------|----------------------------------------------------------|
| Refinement on $F^2$        | 932 restraints                                           |
| Least-squares matrix: full | Hydrogen site location: inferred from neighbouring sites |

|                                 |                                                                                     |
|---------------------------------|-------------------------------------------------------------------------------------|
| $R[F^2 > 2\sigma(F^2)] = 0.055$ | H-atom parameters constrained                                                       |
| $wR(F^2) = 0.150$               | $w = 1/[\sigma^2(F_o^2) + (0.0923P)^2 + 7.6376P]$<br>where $P = (F_o^2 + 2F_c^2)/3$ |
| $S = 1.05$                      | $(\Delta/\sigma)_{\max} = 0.002$                                                    |
| 11948 reflections               | $\Delta_{\max} = 2.89 \text{ e } \text{\AA}^{-3}$                                   |
| 891 parameters                  | $\Delta_{\min} = -0.70 \text{ e } \text{\AA}^{-3}$                                  |

### Special details

*Geometry.* All esds (except the esd in the dihedral angle between two l.s. planes) are estimated using the full covariance matrix. The cell esds are taken into account individually in the estimation of esds in distances, angles and torsion angles; correlations between esds in cell parameters are only used when they are defined by crystal symmetry. An approximate (isotropic) treatment of cell esds is used for estimating esds involving l.s. planes.

### Fractional atomic coordinates and isotropic or equivalent isotropic displacement parameters ( $\text{\AA}^2$ ) for compound **14**

|      | <i>x</i>     | <i>y</i>     | <i>z</i>      | $U_{\text{iso}}^*/U_{\text{eq}}$ |
|------|--------------|--------------|---------------|----------------------------------|
| Br1A | 0.97710 (2)  | 0.53306 (2)  | -0.20398 (2)  | 0.04010 (12)                     |
| Br1  | 0.51754 (2)  | 0.44864 (2)  | 0.69611 (2)   | 0.03416 (11)                     |
| O2A  | 0.87551 (7)  | 0.55160 (9)  | 0.21092 (11)  | 0.0232 (4)                       |
| O6A  | 0.95160 (8)  | 0.55620 (10) | 0.35916 (12)  | 0.0288 (4)                       |
| O3A  | 0.79380 (7)  | 0.65392 (9)  | 0.27061 (11)  | 0.0239 (4)                       |
| H3A  | 0.8002       | 0.6944       | 0.2659        | 0.036*                           |
| O4A  | 0.85823 (8)  | 0.76389 (10) | 0.29108 (13)  | 0.0318 (4)                       |
| O5A  | 1.07190 (9)  | 0.74106 (13) | 0.35515 (15)  | 0.0475 (6)                       |
| O7A  | 0.91566 (10) | 0.25004 (11) | 0.37981 (16)  | 0.0473 (6)                       |
| O1A  | 0.79113 (9)  | 0.51226 (13) | 0.13760 (14)  | 0.0430 (5)                       |
| O2   | 0.63002 (7)  | 0.43773 (8)  | 0.28899 (11)  | 0.0214 (4)                       |
| O6   | 0.55489 (7)  | 0.43391 (8)  | 0.13652 (11)  | 0.0205 (3)                       |
| O3   | 0.71734 (8)  | 0.34668 (9)  | 0.22227 (12)  | 0.0259 (4)                       |
| H3   | 0.7165       | 0.3056       | 0.2154        | 0.039*                           |
| O4   | 0.66788 (8)  | 0.23558 (9)  | 0.15981 (14)  | 0.0332 (4)                       |
| O5   | 0.45908 (8)  | 0.22425 (9)  | 0.10366 (14)  | 0.0348 (4)                       |
| O7   | 0.55952 (10) | 0.74087 (10) | 0.16014 (16)  | 0.0455 (5)                       |
| O1   | 0.70742 (8)  | 0.49126 (10) | 0.36401 (12)  | 0.0300 (4)                       |
| C1A  | 0.93542 (12) | 0.53365 (14) | -0.09829 (17) | 0.0292 (6)                       |
| C2A  | 0.88247 (14) | 0.49994 (19) | -0.0993 (2)   | 0.0434 (8)                       |

|      |              |              |               |            |
|------|--------------|--------------|---------------|------------|
| H2A  | 0.8670       | 0.4769       | -0.1521       | 0.052*     |
| C3A  | 0.85220 (13) | 0.50006 (19) | -0.0225 (2)   | 0.0440 (8) |
| H3AA | 0.8152       | 0.4777       | -0.0232       | 0.053*     |
| C4A  | 0.87541 (11) | 0.53266 (13) | 0.05584 (17)  | 0.0253 (5) |
| C7A  | 0.84201 (12) | 0.53033 (13) | 0.13736 (18)  | 0.0257 (5) |
| C8A  | 0.84965 (11) | 0.55479 (13) | 0.29565 (16)  | 0.0229 (5) |
| H8A  | 0.8115       | 0.5297       | 0.2924        | 0.027*     |
| C12A | 0.89412 (11) | 0.52826 (14) | 0.37171 (17)  | 0.0263 (6) |
| C11A | 0.87237 (12) | 0.56072 (14) | 0.46042 (17)  | 0.0273 (6) |
| H11A | 0.9064       | 0.5877       | 0.4882        | 0.033*     |
| C26A | 0.85717 (13) | 0.51332 (15) | 0.53201 (18)  | 0.0326 (6) |
| H26A | 0.8827       | 0.4764       | 0.5417        | 0.039*     |
| C27A | 0.81306 (12) | 0.51653 (14) | 0.58286 (18)  | 0.0306 (6) |
| H27A | 0.7859       | 0.5520       | 0.5721        | 0.037*     |
| C28A | 0.80180 (11) | 0.46959 (14) | 0.65585 (18)  | 0.0281 (6) |
| C29A | 0.76281 (12) | 0.48665 (14) | 0.71995 (18)  | 0.0293 (6) |
| H29A | 0.7436       | 0.5283       | 0.7162        | 0.035*     |
| C30A | 0.75187 (12) | 0.44329 (15) | 0.78920 (18)  | 0.0328 (6) |
| H30A | 0.7246       | 0.4551       | 0.8314        | 0.039*     |
| C31A | 0.78042 (13) | 0.38309 (16) | 0.7969 (2)    | 0.0364 (6) |
| H31A | 0.7734       | 0.3540       | 0.8449        | 0.044*     |
| C5A  | 0.92904 (11) | 0.56607 (13) | 0.05532 (17)  | 0.0244 (5) |
| H5A  | 0.9452       | 0.5884       | 0.1084        | 0.029*     |
| C6A  | 0.95912 (12) | 0.56712 (14) | -0.02190 (18) | 0.0297 (6) |
| H6A  | 0.9955       | 0.5905       | -0.0224       | 0.036*     |
| C18A | 0.95274 (11) | 0.62277 (15) | 0.34670 (16)  | 0.0285 (6) |
| C13A | 0.90073 (11) | 0.66008 (14) | 0.32741 (16)  | 0.0258 (5) |
| C9A  | 0.84085 (11) | 0.62479 (13) | 0.32637 (16)  | 0.0229 (5) |
| C10A | 0.82361 (11) | 0.61011 (13) | 0.42431 (16)  | 0.0241 (5) |
| H10A | 0.7850       | 0.5857       | 0.4178        | 0.029*     |
| C32A | 0.81955 (13) | 0.36527 (16) | 0.7339 (2)    | 0.0360 (6) |
| H32A | 0.8397       | 0.3242       | 0.7393        | 0.043*     |
| C33A | 0.82910 (12) | 0.40769 (15) | 0.66296 (19)  | 0.0314 (6) |
| H33A | 0.8545       | 0.3945       | 0.6188        | 0.038*     |
| C20A | 0.81465 (12) | 0.67072 (14) | 0.47981 (16)  | 0.0266 (5) |
| C21A | 0.86134 (13) | 0.71121 (16) | 0.51519 (18)  | 0.0362 (6) |
| H21A | 0.9012       | 0.6990       | 0.5080        | 0.043*     |

|      |              |              |              |            |
|------|--------------|--------------|--------------|------------|
| C22A | 0.85007 (16) | 0.76905 (16) | 0.5607 (2)   | 0.0431 (7) |
| H22A | 0.8821       | 0.7962       | 0.5841       | 0.052*     |
| C23A | 0.79223 (16) | 0.78704 (16) | 0.57198 (19) | 0.0429 (8) |
| H23A | 0.7846       | 0.8265       | 0.6032       | 0.051*     |
| C24A | 0.74603 (15) | 0.74796 (16) | 0.5382 (2)   | 0.0400 (7) |
| H24A | 0.7063       | 0.7604       | 0.5461       | 0.048*     |
| C25A | 0.75686 (13) | 0.69018 (15) | 0.49239 (18) | 0.0324 (6) |
| H25A | 0.7244       | 0.6635       | 0.4693       | 0.039*     |
| C14A | 0.90889 (11) | 0.72741 (15) | 0.31388 (17) | 0.0283 (6) |
| C19A | 0.86490 (13) | 0.82991 (15) | 0.2582 (2)   | 0.0383 (7) |
| H19A | 0.8787       | 0.8588       | 0.3089       | 0.057*     |
| H19B | 0.8265       | 0.8458       | 0.2300       | 0.057*     |
| H19C | 0.8940       | 0.8301       | 0.2133       | 0.057*     |
| C15A | 0.96509 (12) | 0.75720 (16) | 0.32294 (18) | 0.0338 (6) |
| H15A | 0.9692       | 0.8033       | 0.3152       | 0.041*     |
| C16A | 1.01493 (12) | 0.71736 (17) | 0.34367 (18) | 0.0365 (7) |
| C41A | 1.07965 (13) | 0.8102 (2)   | 0.3543 (2)   | 0.0499 (9) |
| H41A | 1.0622       | 0.8279       | 0.2963       | 0.075*     |
| H41B | 1.1222       | 0.8205       | 0.3623       | 0.075*     |
| H41C | 1.0599       | 0.8299       | 0.4038       | 0.075*     |
| C17A | 1.00901 (12) | 0.65061 (17) | 0.35386 (18) | 0.0347 (6) |
| H17A | 1.0432       | 0.6237       | 0.3657       | 0.042*     |
| C34A | 0.90172 (12) | 0.45486 (15) | 0.37292 (17) | 0.0287 (6) |
| C39A | 0.95644 (13) | 0.42596 (16) | 0.40050 (17) | 0.0337 (6) |
| H39A | 0.9899       | 0.4532       | 0.4170       | 0.040*     |
| C38A | 0.96302 (13) | 0.35773 (16) | 0.40435 (18) | 0.0370 (7) |
| H38A | 1.0006       | 0.3390       | 0.4236       | 0.044*     |
| C37A | 0.91483 (14) | 0.31731 (16) | 0.3802 (2)   | 0.0379 (7) |
| C40A | 0.97115 (15) | 0.21840 (18) | 0.4014 (2)   | 0.0483 (8) |
| H40A | 0.9994       | 0.2331       | 0.3594       | 0.072*     |
| H40B | 0.9659       | 0.1706       | 0.3962       | 0.072*     |
| H40C | 0.9865       | 0.2296       | 0.4636       | 0.072*     |
| C36A | 0.85988 (13) | 0.34547 (16) | 0.3525 (2)   | 0.0409 (7) |
| H36A | 0.8266       | 0.3181       | 0.3357       | 0.049*     |
| C35A | 0.85365 (12) | 0.41311 (16) | 0.3494 (2)   | 0.0364 (7) |
| H35A | 0.8158       | 0.4316       | 0.3309       | 0.044*     |
| C1   | 0.56037 (12) | 0.45366 (13) | 0.59212 (18) | 0.0254 (5) |

|     |              |              |               |            |
|-----|--------------|--------------|---------------|------------|
| C6  | 0.61621 (12) | 0.48257 (14) | 0.59970 (18)  | 0.0299 (6) |
| H6  | 0.6326       | 0.5001       | 0.6561        | 0.036*     |
| C5  | 0.64780 (12) | 0.48566 (14) | 0.52427 (18)  | 0.0280 (6) |
| H5  | 0.6860       | 0.5056       | 0.5288        | 0.034*     |
| C4  | 0.62389 (11) | 0.45977 (12) | 0.44203 (17)  | 0.0203 (5) |
| C7  | 0.65918 (11) | 0.46523 (12) | 0.36280 (17)  | 0.0205 (5) |
| C8  | 0.65590 (11) | 0.44216 (12) | 0.20495 (16)  | 0.0202 (5) |
| H8  | 0.6922       | 0.4705       | 0.2115        | 0.024*     |
| C12 | 0.61051 (11) | 0.46915 (12) | 0.13144 (16)  | 0.0200 (5) |
| C11 | 0.63722 (11) | 0.44790 (12) | 0.04082 (16)  | 0.0206 (5) |
| H11 | 0.6057       | 0.4247       | 0.0009        | 0.025*     |
| C26 | 0.66014 (11) | 0.50423 (13) | -0.01067 (17) | 0.0242 (5) |
| H26 | 0.6955       | 0.5251       | 0.0148        | 0.029*     |
| C27 | 0.63548 (11) | 0.52715 (13) | -0.08810 (17) | 0.0251 (5) |
| H27 | 0.5995       | 0.5070       | -0.1123       | 0.030*     |
| C28 | 0.65858 (12) | 0.58148 (13) | -0.14130 (17) | 0.0270 (5) |
| C29 | 0.62960 (13) | 0.59710 (13) | -0.22570 (18) | 0.0302 (6) |
| H29 | 0.5942       | 0.5746       | -0.2470       | 0.036*     |
| C30 | 0.65237 (15) | 0.64563 (14) | -0.2790 (2)   | 0.0375 (7) |
| H30 | 0.6330       | 0.6552       | -0.3372       | 0.045*     |
| C31 | 0.70264 (14) | 0.67977 (15) | -0.2479 (2)   | 0.0381 (7) |
| H31 | 0.7183       | 0.7124       | -0.2849       | 0.046*     |
| C3  | 0.56806 (11) | 0.43017 (12) | 0.43620 (17)  | 0.0223 (5) |
| H3B | 0.5518       | 0.4120       | 0.3802        | 0.027*     |
| C2  | 0.53612 (11) | 0.42692 (12) | 0.51107 (18)  | 0.0254 (5) |
| H2  | 0.4981       | 0.4066       | 0.5069        | 0.030*     |
| C18 | 0.55909 (11) | 0.36621 (12) | 0.13964 (15)  | 0.0217 (5) |
| C13 | 0.61362 (11) | 0.33457 (13) | 0.15492 (16)  | 0.0229 (5) |
| C9  | 0.67001 (11) | 0.37548 (12) | 0.16646 (16)  | 0.0215 (5) |
| C10 | 0.68705 (10) | 0.39772 (13) | 0.07198 (16)  | 0.0215 (5) |
| H10 | 0.7250       | 0.4230       | 0.0823        | 0.026*     |
| C32 | 0.73053 (14) | 0.66647 (15) | -0.1625 (2)   | 0.0374 (7) |
| H32 | 0.7645       | 0.6911       | -0.1400       | 0.045*     |
| C33 | 0.70884 (13) | 0.61737 (14) | -0.11013 (19) | 0.0336 (6) |
| H33 | 0.7285       | 0.6080       | -0.0520       | 0.040*     |
| C20 | 0.69847 (11) | 0.34031 (13) | 0.01135 (17)  | 0.0249 (5) |
| C25 | 0.65643 (12) | 0.31261 (15) | -0.05128 (19) | 0.0332 (6) |



|      |              |              |              |            |
|------|--------------|--------------|--------------|------------|
| H25  | 0.6188       | 0.3332       | -0.0637      | 0.040*     |
| C24  | 0.66873 (13) | 0.25466 (16) | -0.0964 (2)  | 0.0390 (7) |
| H24  | 0.6395       | 0.2364       | -0.1395      | 0.047*     |
| C23  | 0.72293 (14) | 0.22360 (15) | -0.0789 (2)  | 0.0373 (7) |
| H23  | 0.7305       | 0.1832       | -0.1080      | 0.045*     |
| C22  | 0.76610 (14) | 0.25189 (16) | -0.0187 (2)  | 0.0376 (7) |
| H22  | 0.8039       | 0.2315       | -0.0073      | 0.045*     |
| C21  | 0.75418 (12) | 0.31008 (15) | 0.02508 (19) | 0.0312 (6) |
| H21  | 0.7844       | 0.3298       | 0.0652       | 0.037*     |
| C14  | 0.61349 (12) | 0.26527 (13) | 0.15020 (17) | 0.0269 (5) |
| C19  | 0.66994 (14) | 0.16698 (14) | 0.1368 (2)   | 0.0382 (7) |
| H19D | 0.6513       | 0.1411       | 0.1821       | 0.057*     |
| H19E | 0.7114       | 0.1532       | 0.1358       | 0.057*     |
| H19F | 0.6486       | 0.1599       | 0.0769       | 0.057*     |
| C15  | 0.56102 (12) | 0.23043 (13) | 0.13503 (18) | 0.0292 (6) |
| H15  | 0.5616       | 0.1837       | 0.1338       | 0.035*     |
| C16  | 0.50743 (12) | 0.26422 (13) | 0.12160 (17) | 0.0277 (6) |
| C41  | 0.40269 (12) | 0.25516 (15) | 0.0917 (2)   | 0.0392 (7) |
| H41D | 0.3967       | 0.2815       | 0.1454       | 0.059*     |
| H41E | 0.3716       | 0.2216       | 0.0830       | 0.059*     |
| H41F | 0.4008       | 0.2838       | 0.0383       | 0.059*     |
| C17  | 0.50532 (11) | 0.33243 (13) | 0.12380 (16) | 0.0238 (5) |
| H17  | 0.4686       | 0.3553       | 0.1148       | 0.029*     |
| C34  | 0.59630 (11) | 0.54114 (12) | 0.13893 (17) | 0.0221 (5) |
| C39  | 0.63764 (12) | 0.58551 (14) | 0.1799 (2)   | 0.0322 (6) |
| H39  | 0.6756       | 0.5701       | 0.2037       | 0.039*     |
| C38  | 0.62410 (13) | 0.65139 (14) | 0.1862 (2)   | 0.0379 (7) |
| H38  | 0.6526       | 0.6809       | 0.2149       | 0.046*     |
| C37  | 0.56861 (13) | 0.67483 (13) | 0.15044 (19) | 0.0329 (6) |
| C40  | 0.50080 (15) | 0.76470 (16) | 0.1374 (2)   | 0.0454 (8) |
| H40D | 0.4907       | 0.7611       | 0.0718       | 0.068*     |
| H40E | 0.4985       | 0.8109       | 0.1558       | 0.068*     |
| H40F | 0.4728       | 0.7385       | 0.1690       | 0.068*     |
| C36  | 0.52761 (12) | 0.63166 (13) | 0.10826 (17) | 0.0269 (5) |
| H36  | 0.4900       | 0.6472       | 0.0828       | 0.032*     |
| C35  | 0.54172 (11) | 0.56536 (13) | 0.10331 (16) | 0.0230 (5) |
| H35  | 0.5132       | 0.5358       | 0.0748       | 0.028*     |

## VII. SELECT SPECTRA

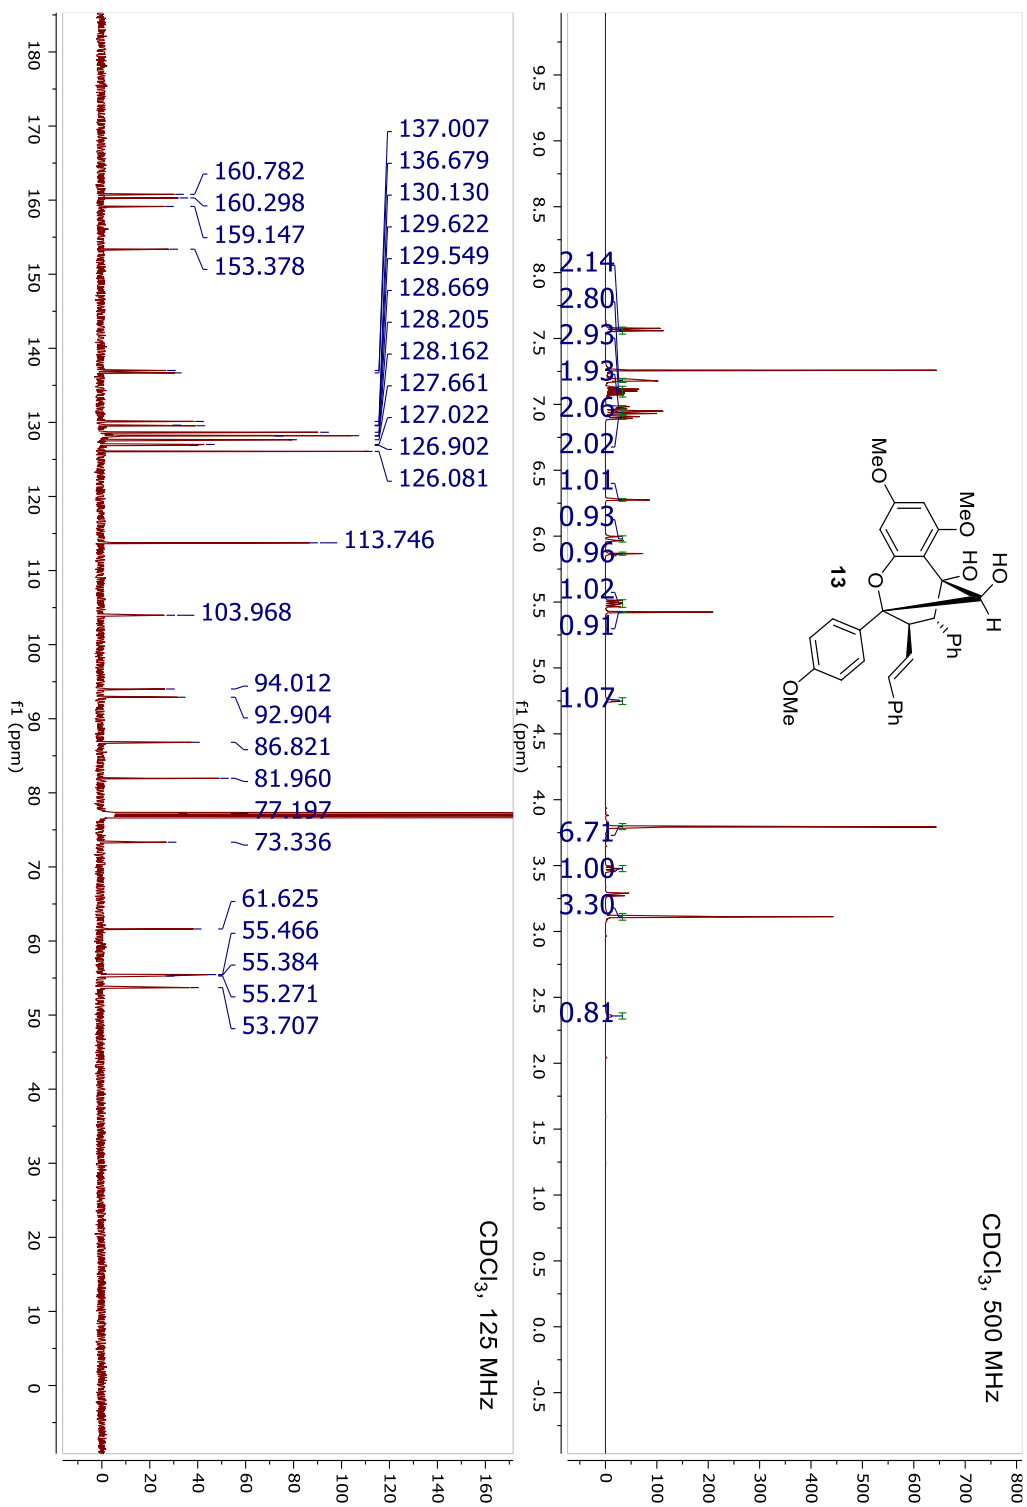

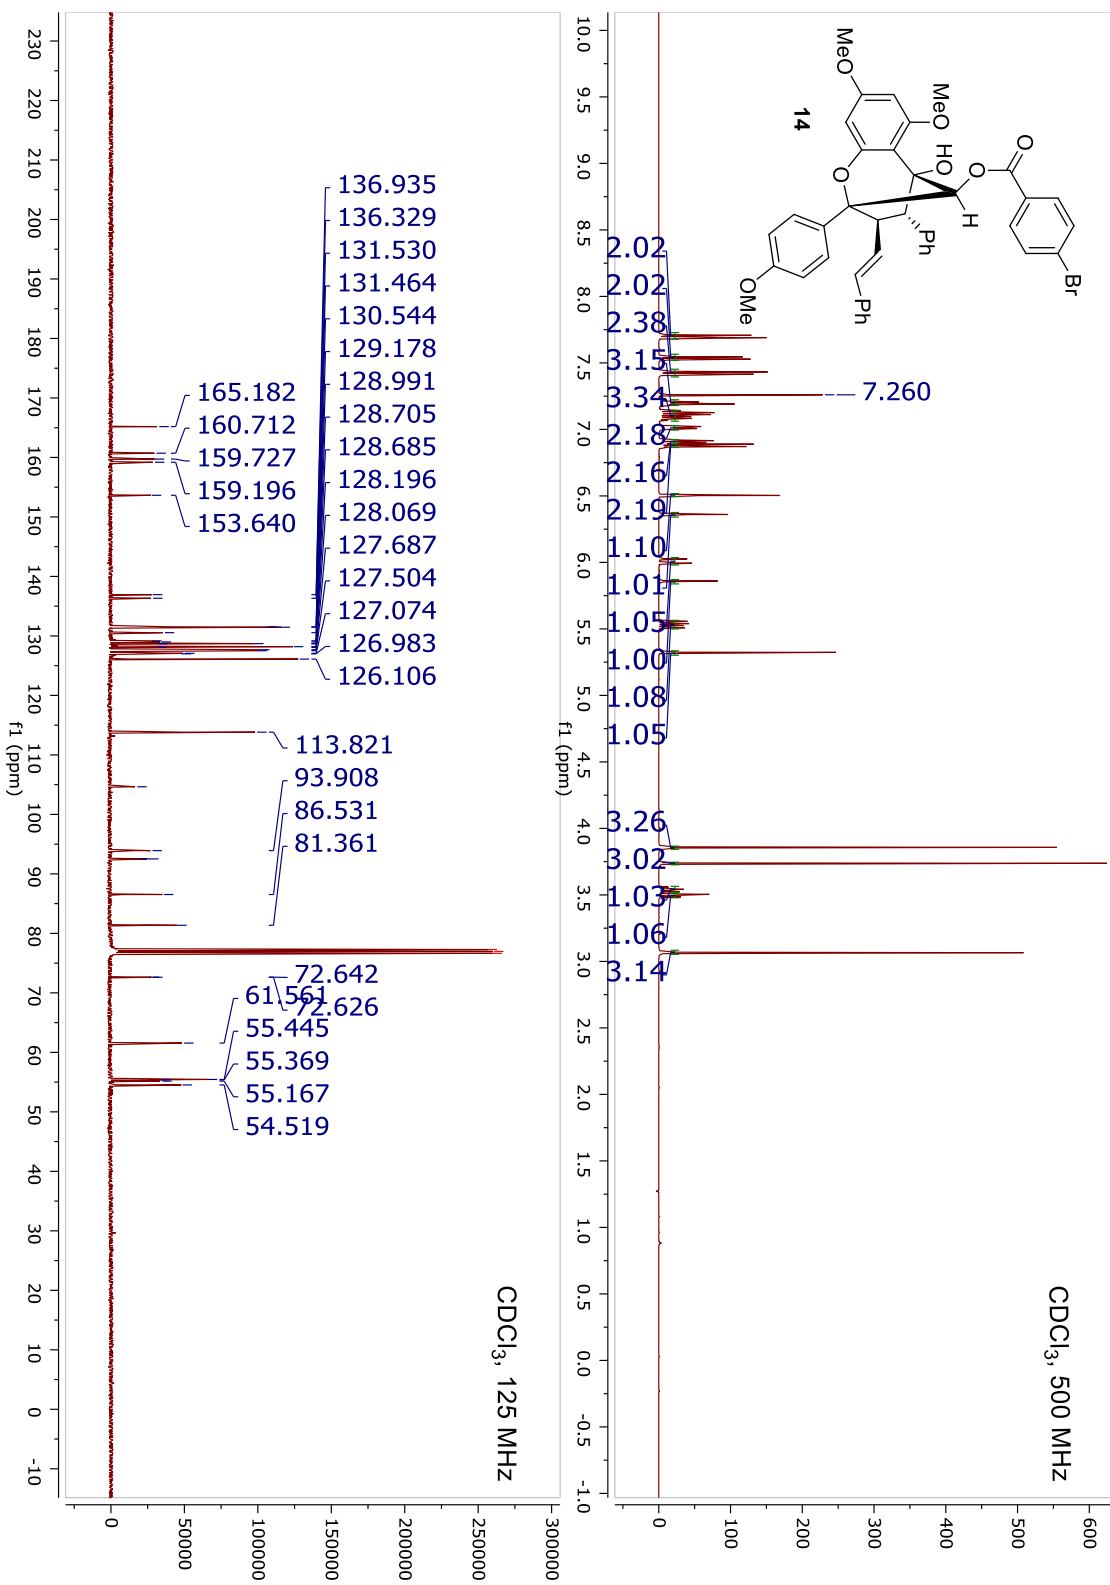

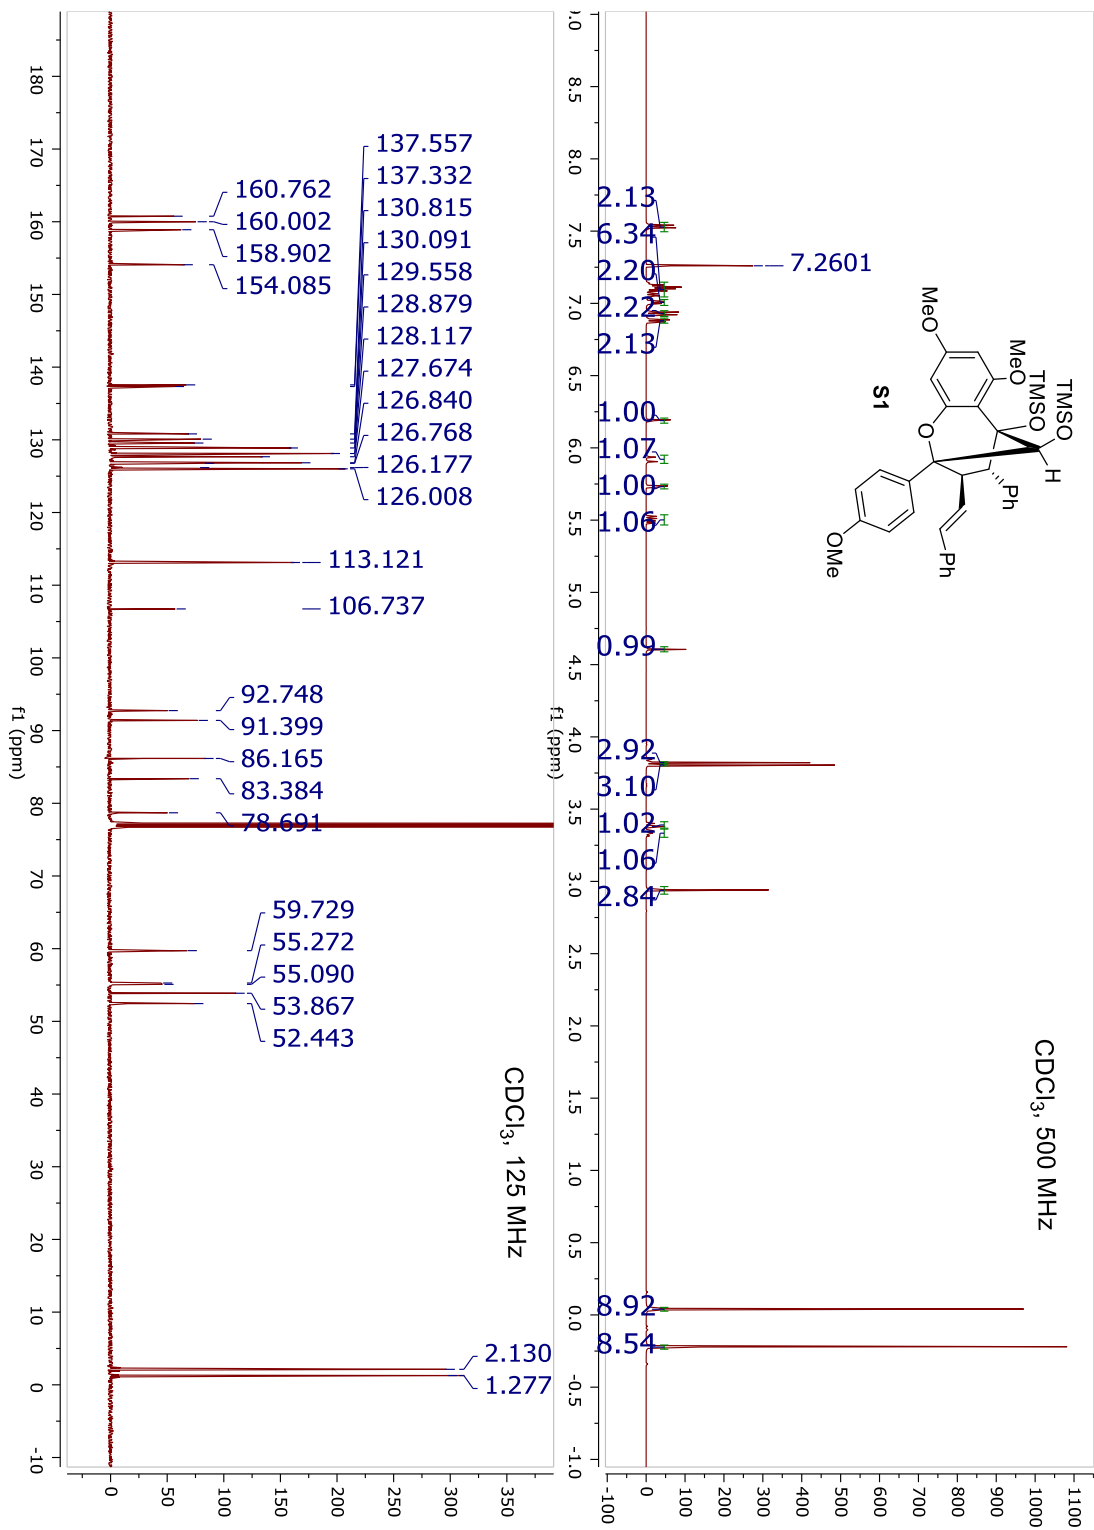





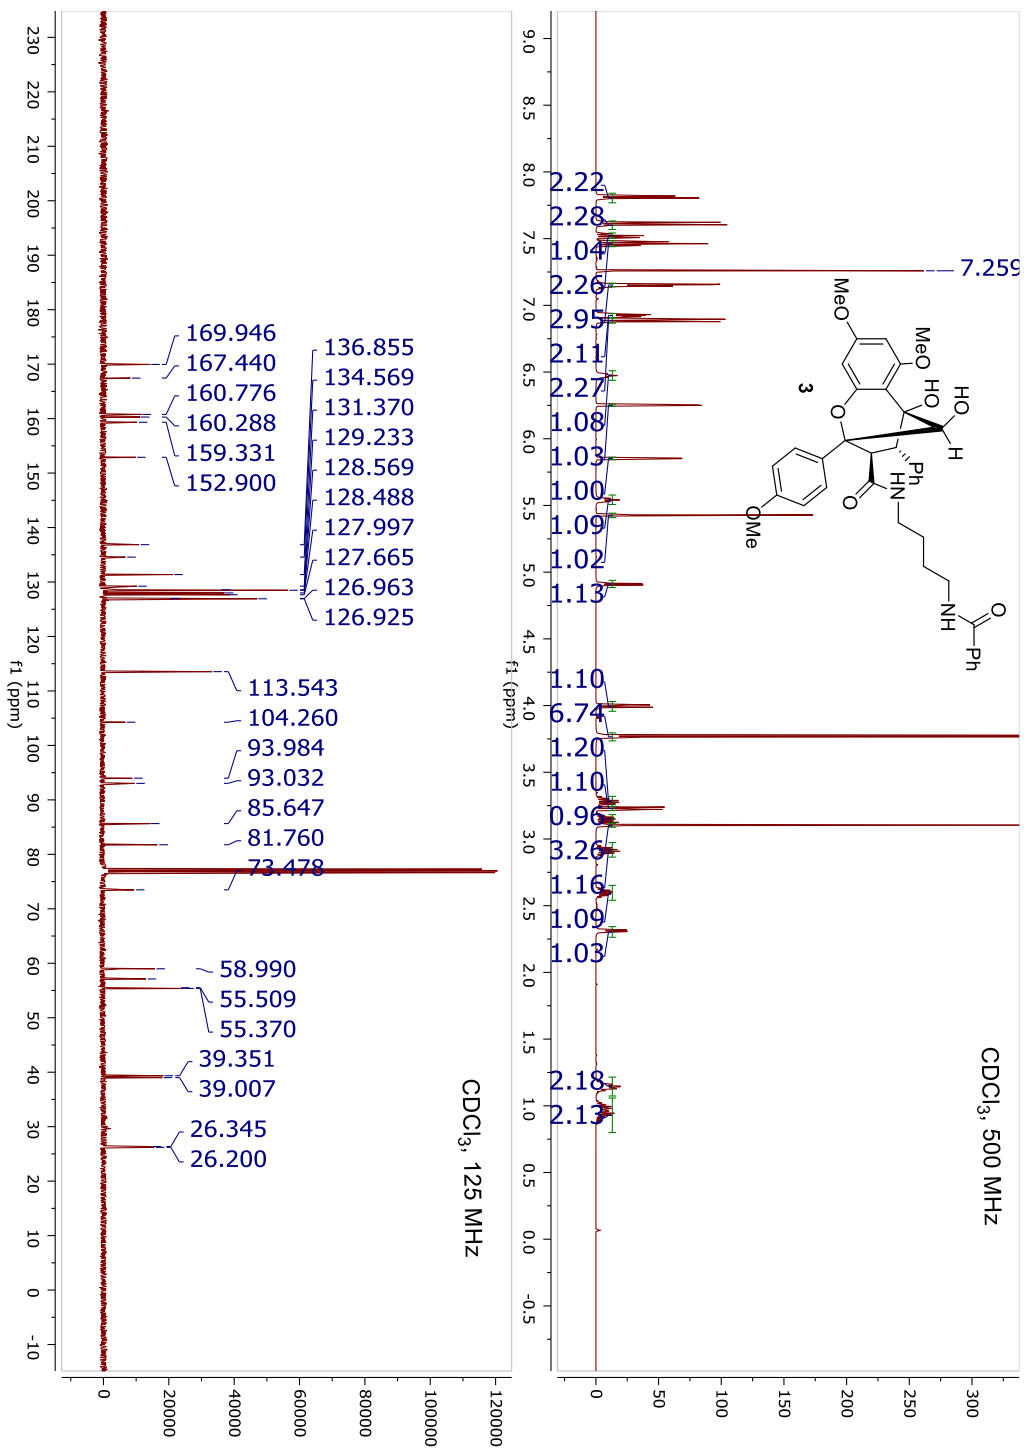

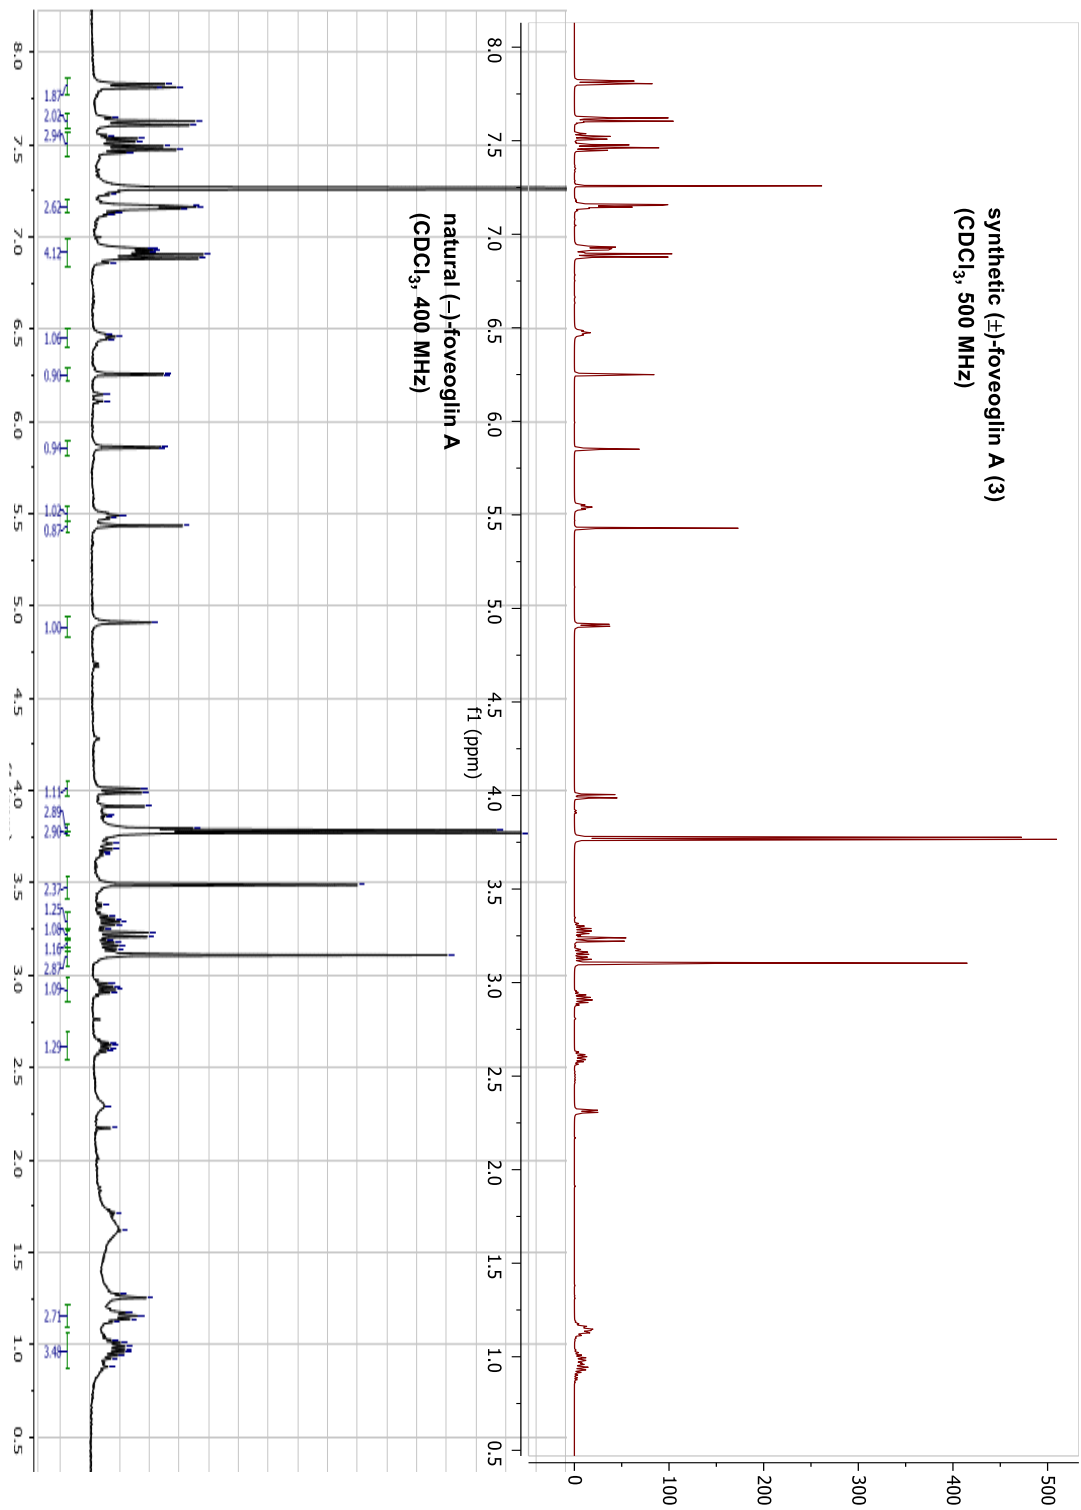



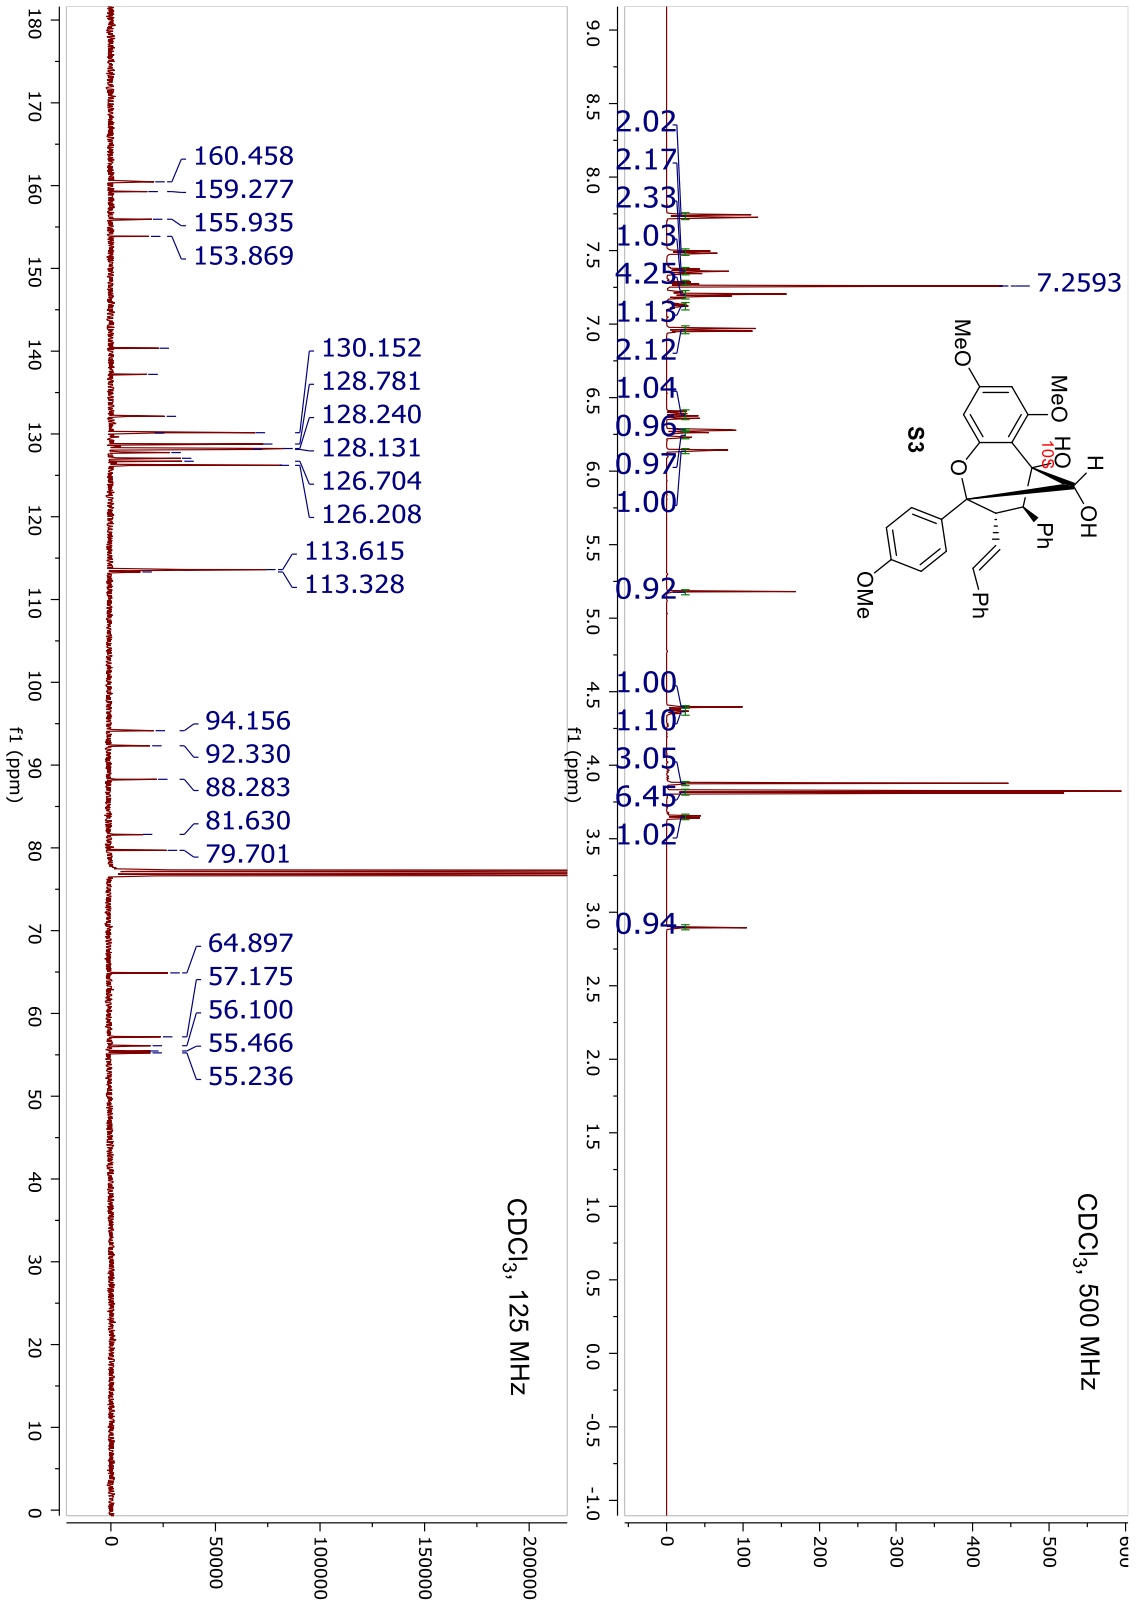

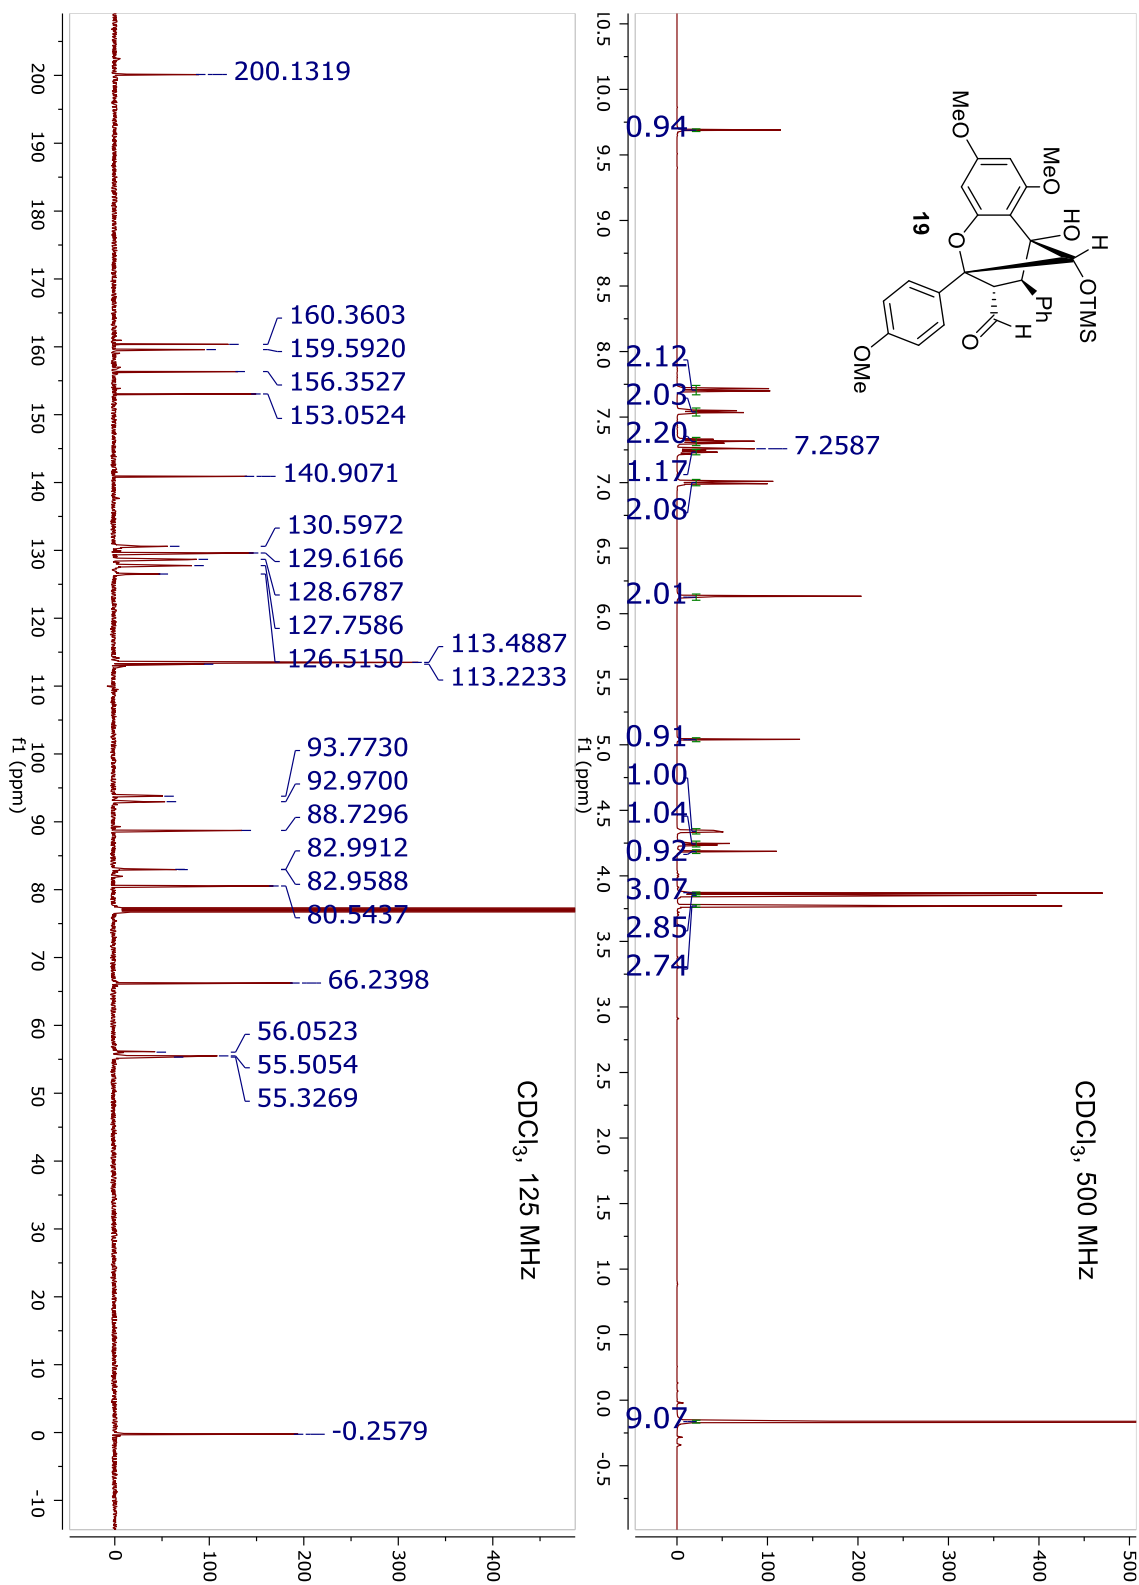

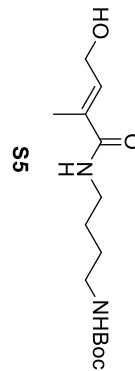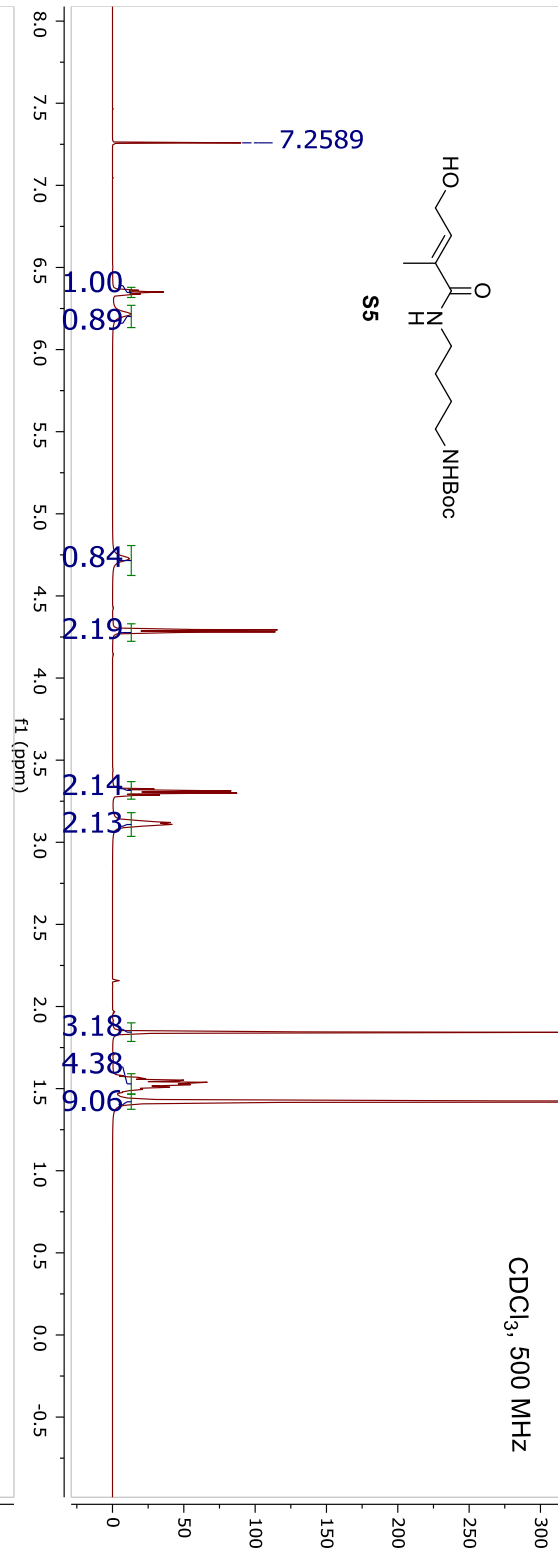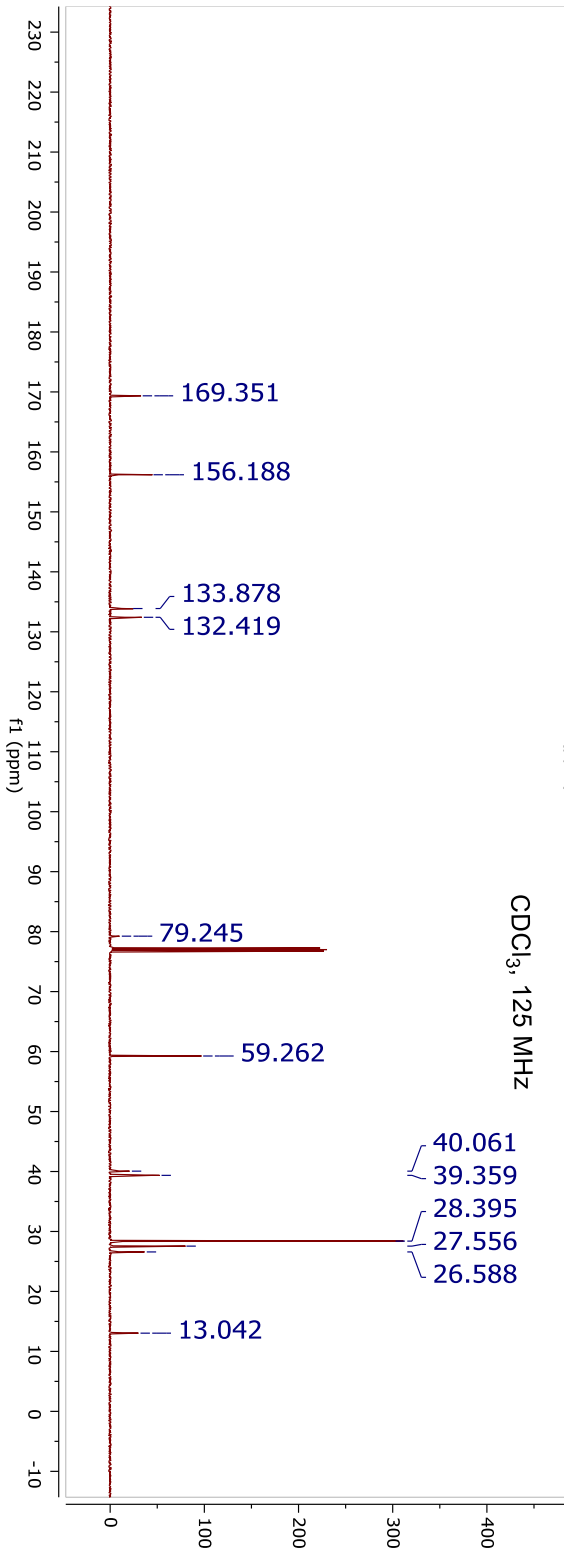

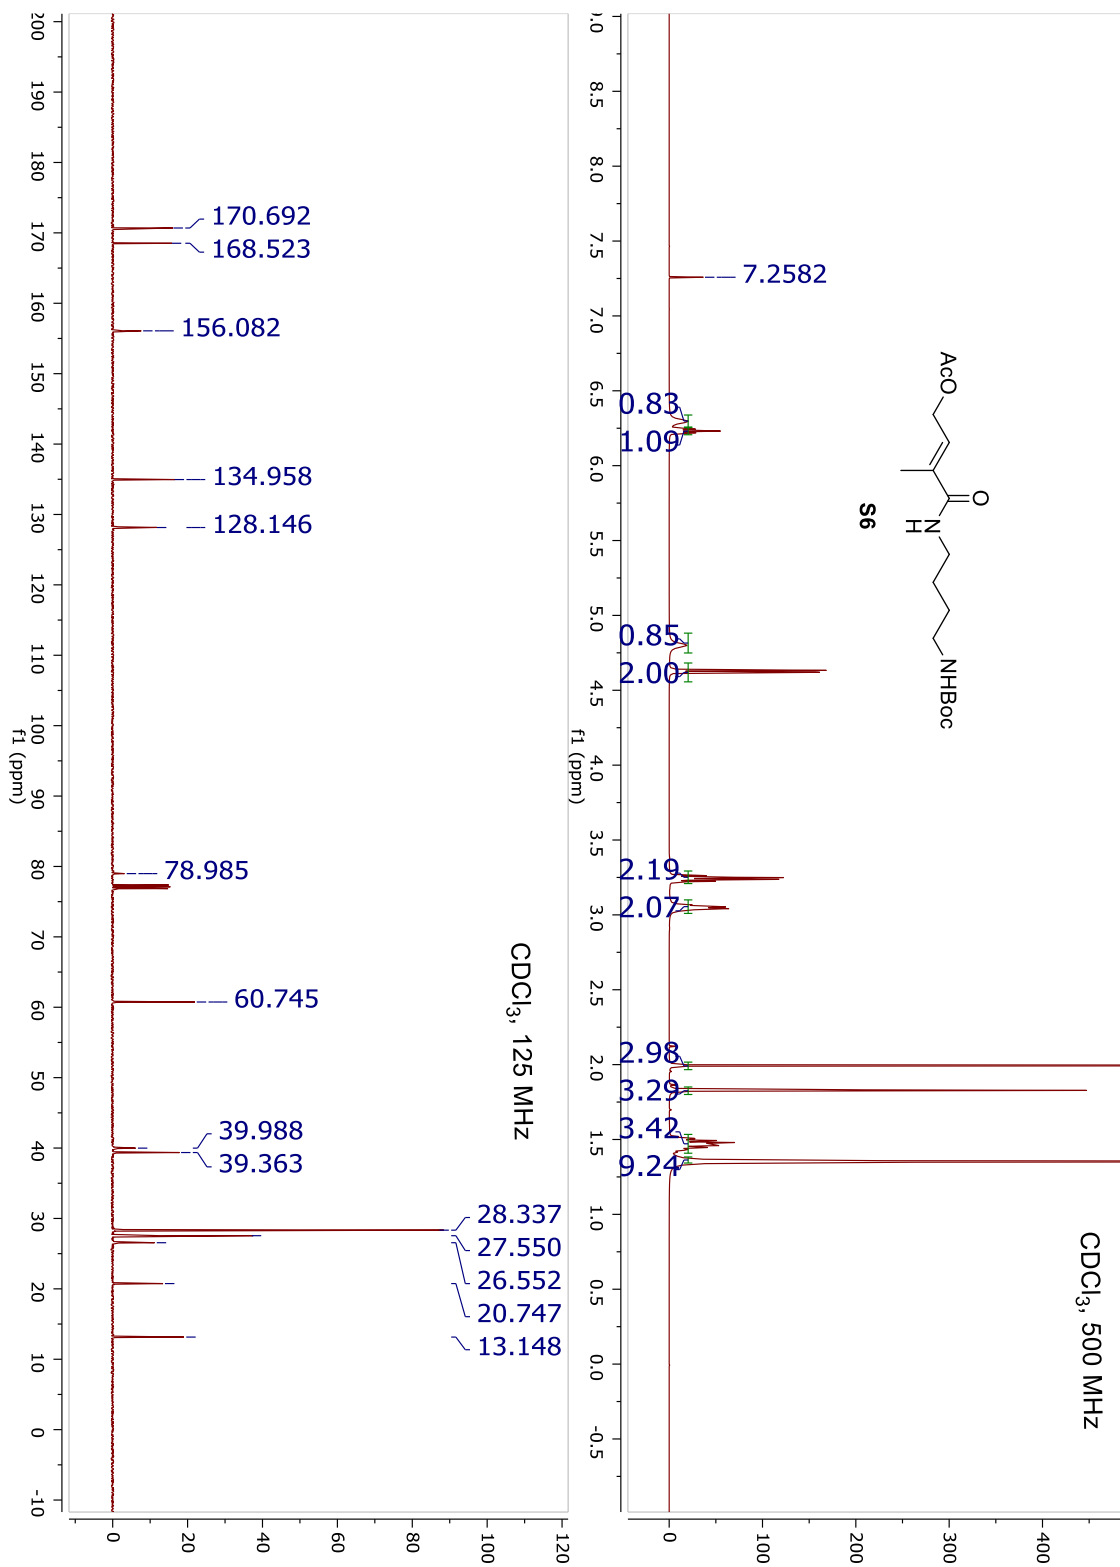

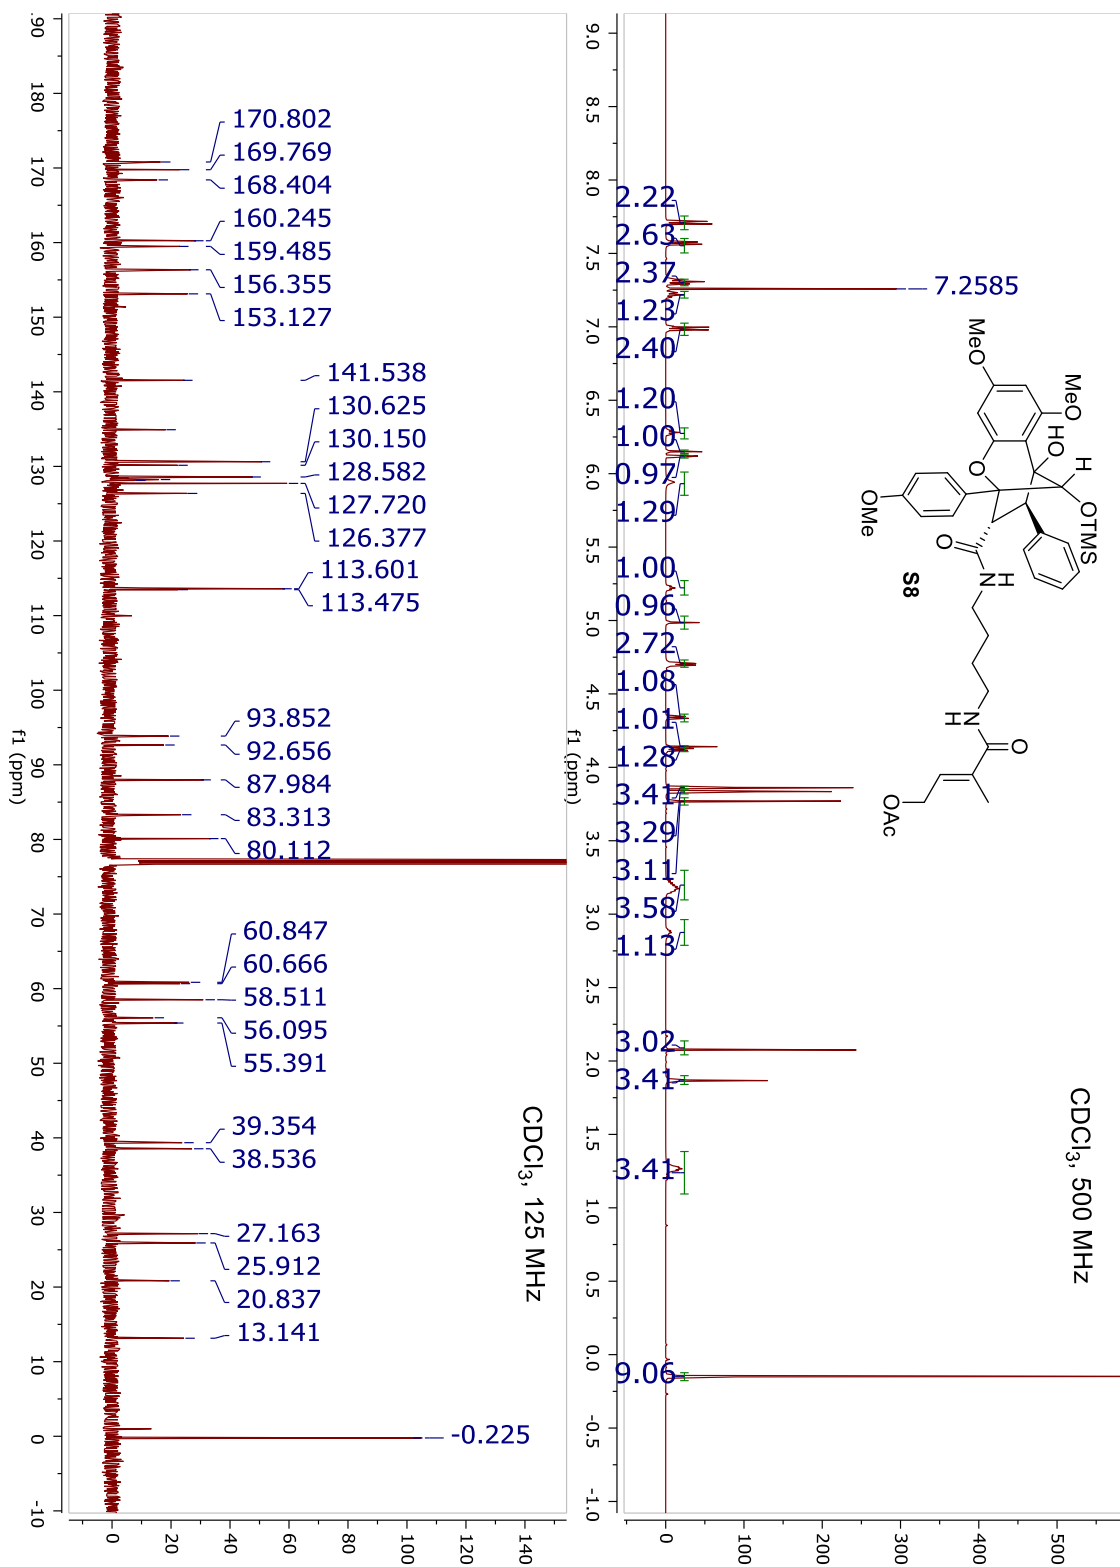

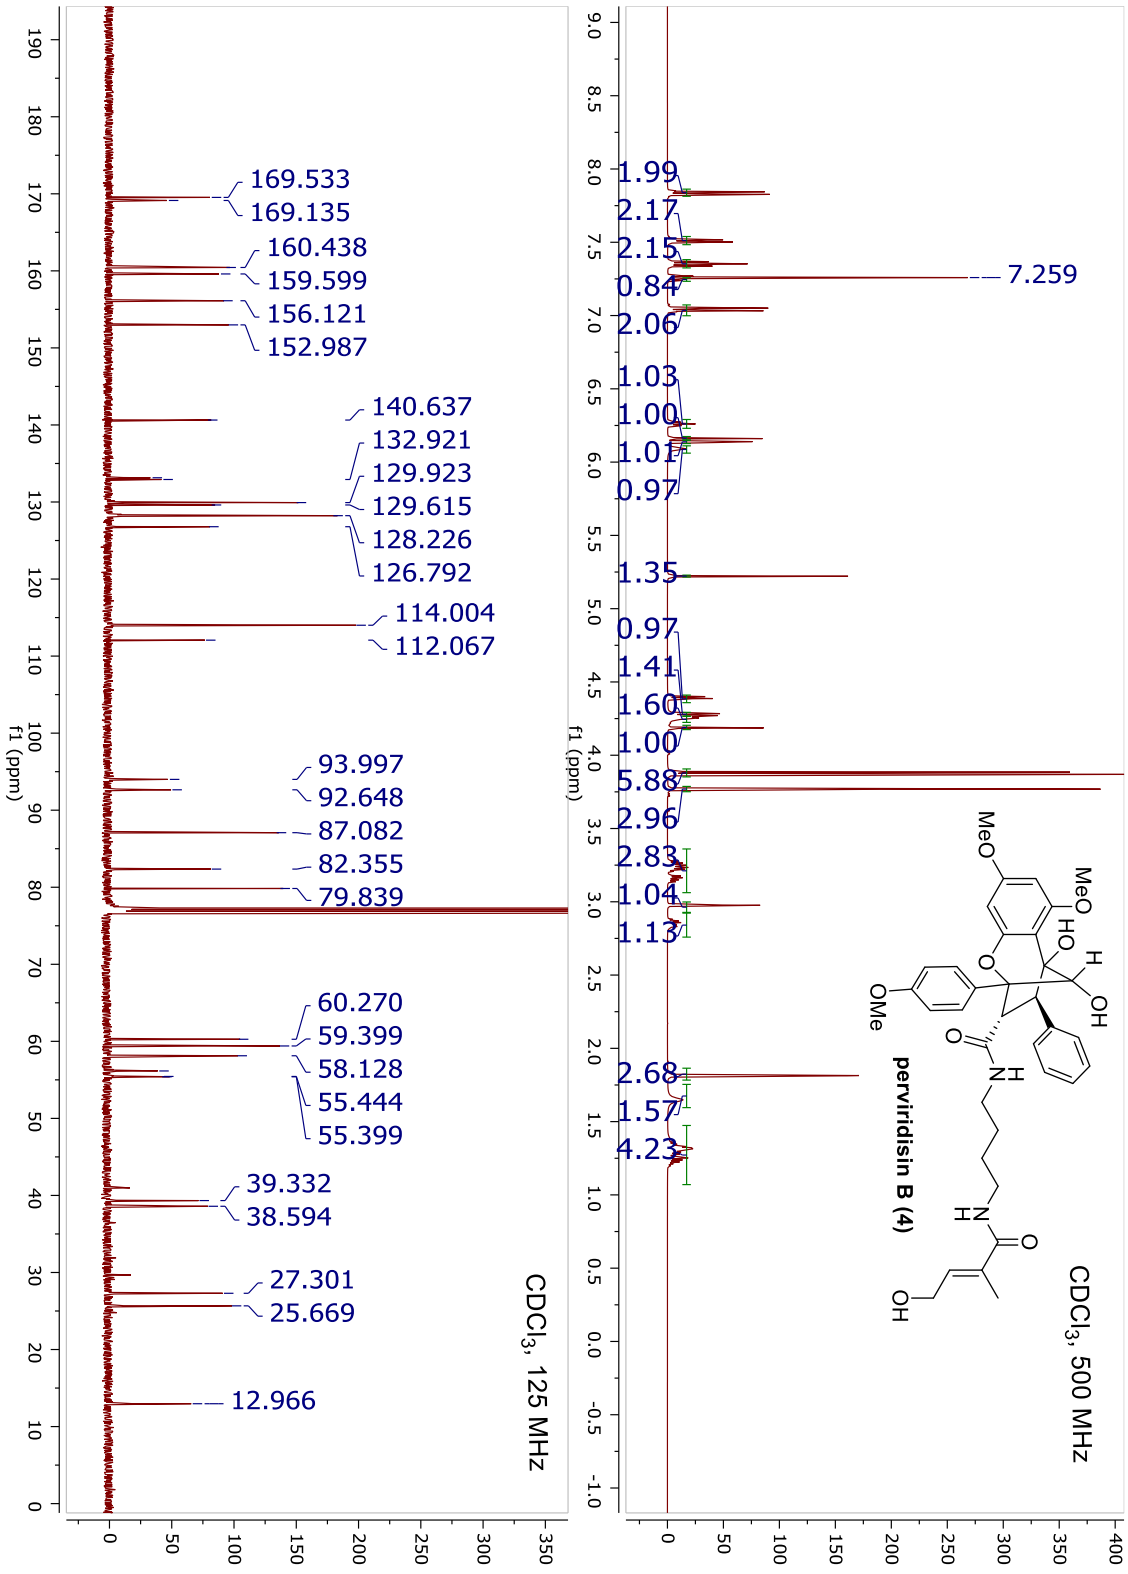

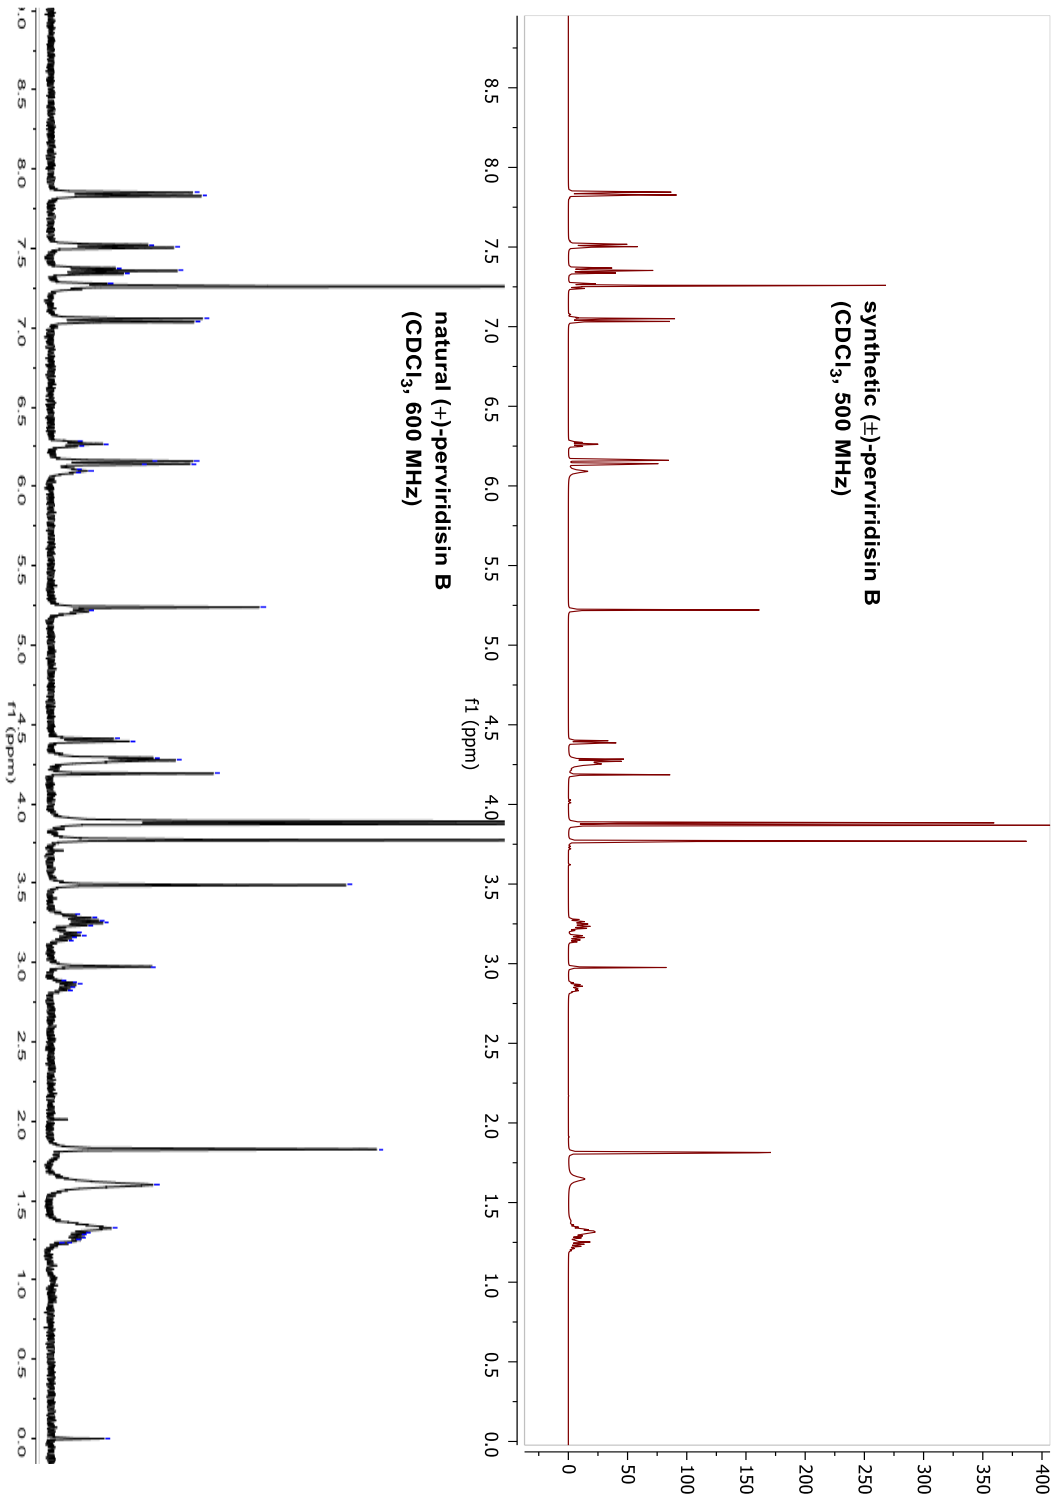

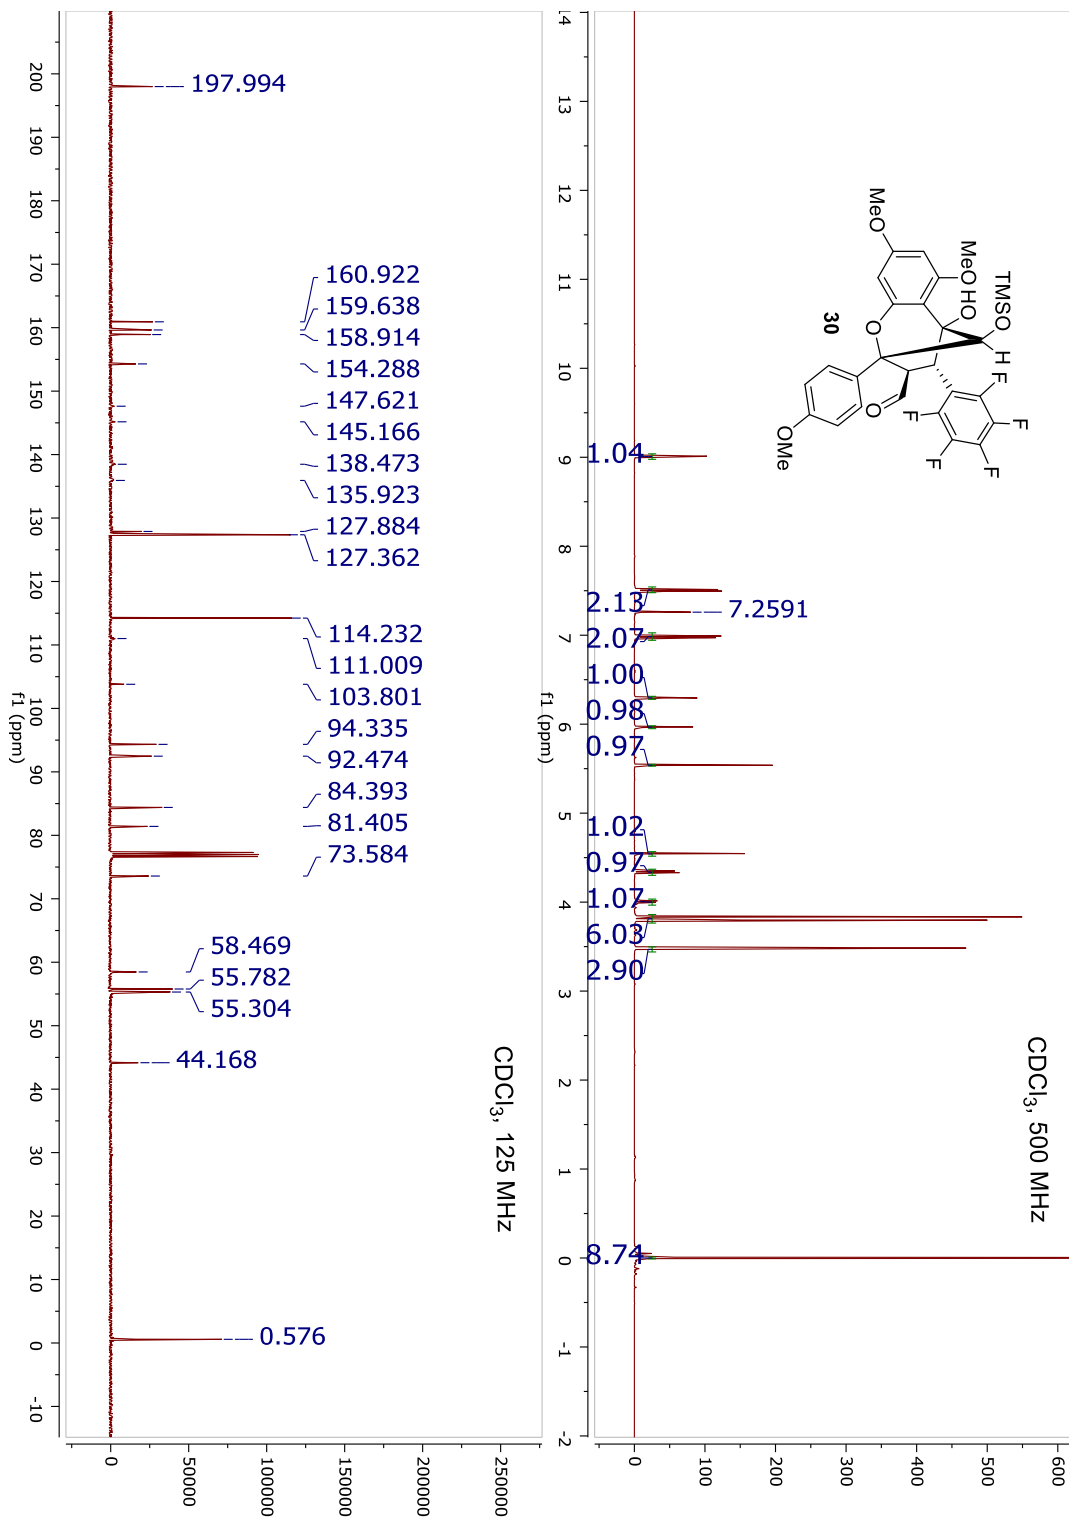



$^{19}\text{F}$  NMR for compound **30**,  $\text{CDCl}_3$ , 375 MHz.

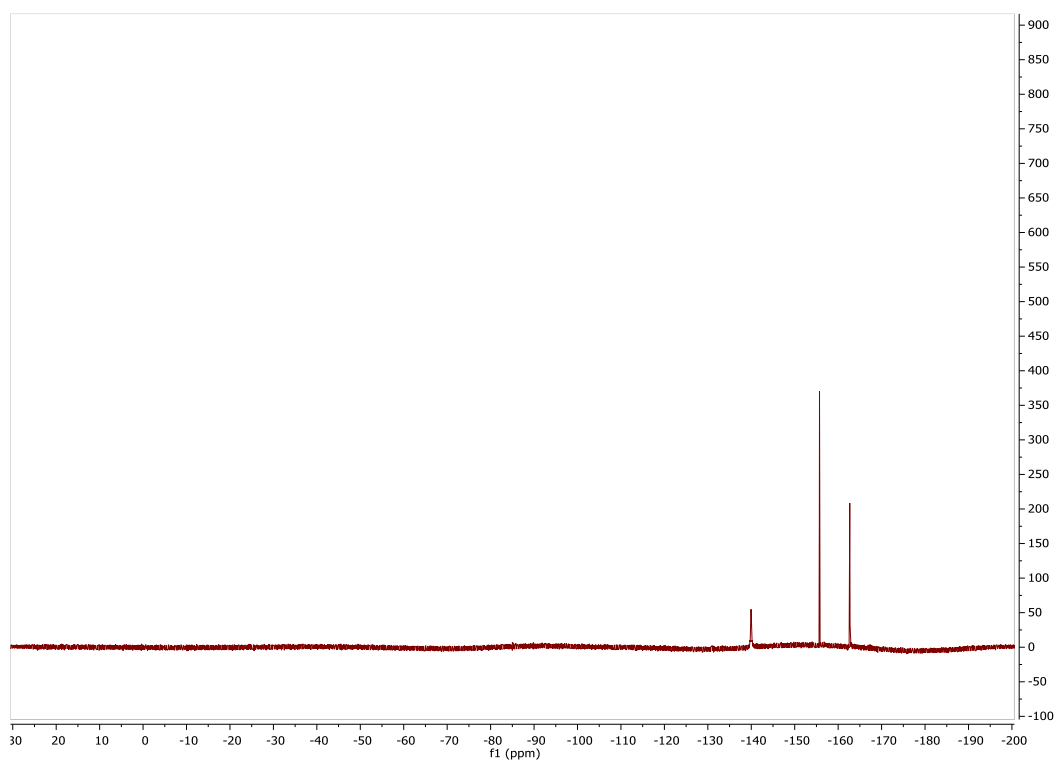

HSQC

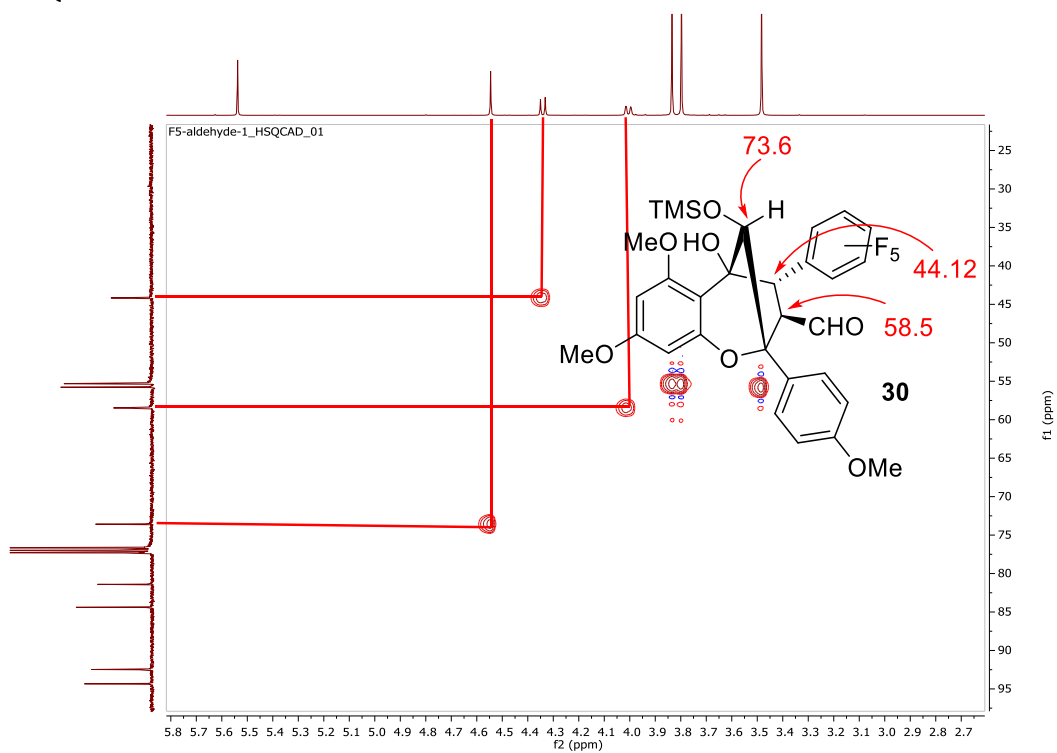

HMBC (compound **30**):

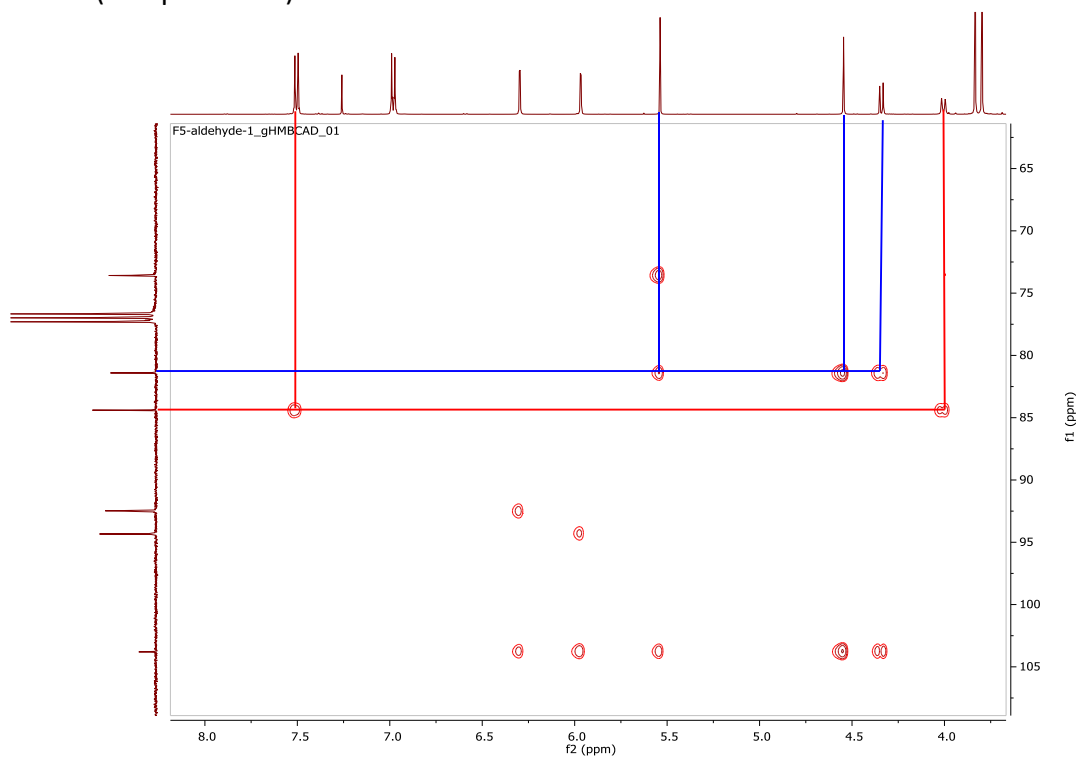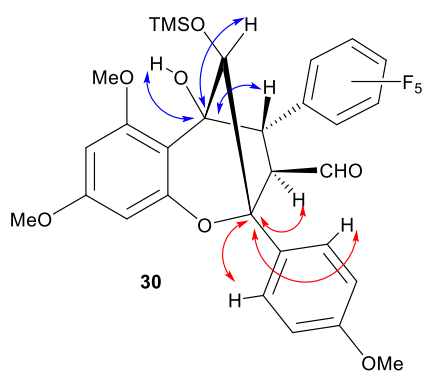

NOESY (compound **30**):

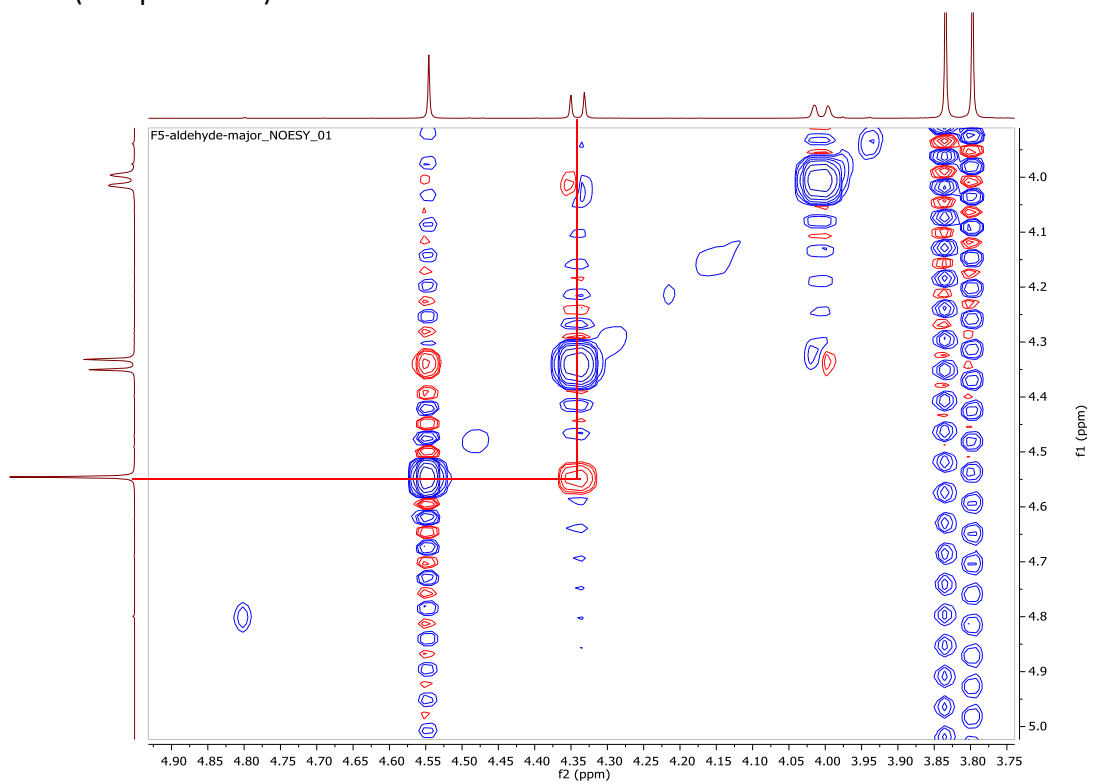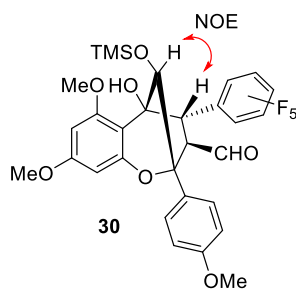

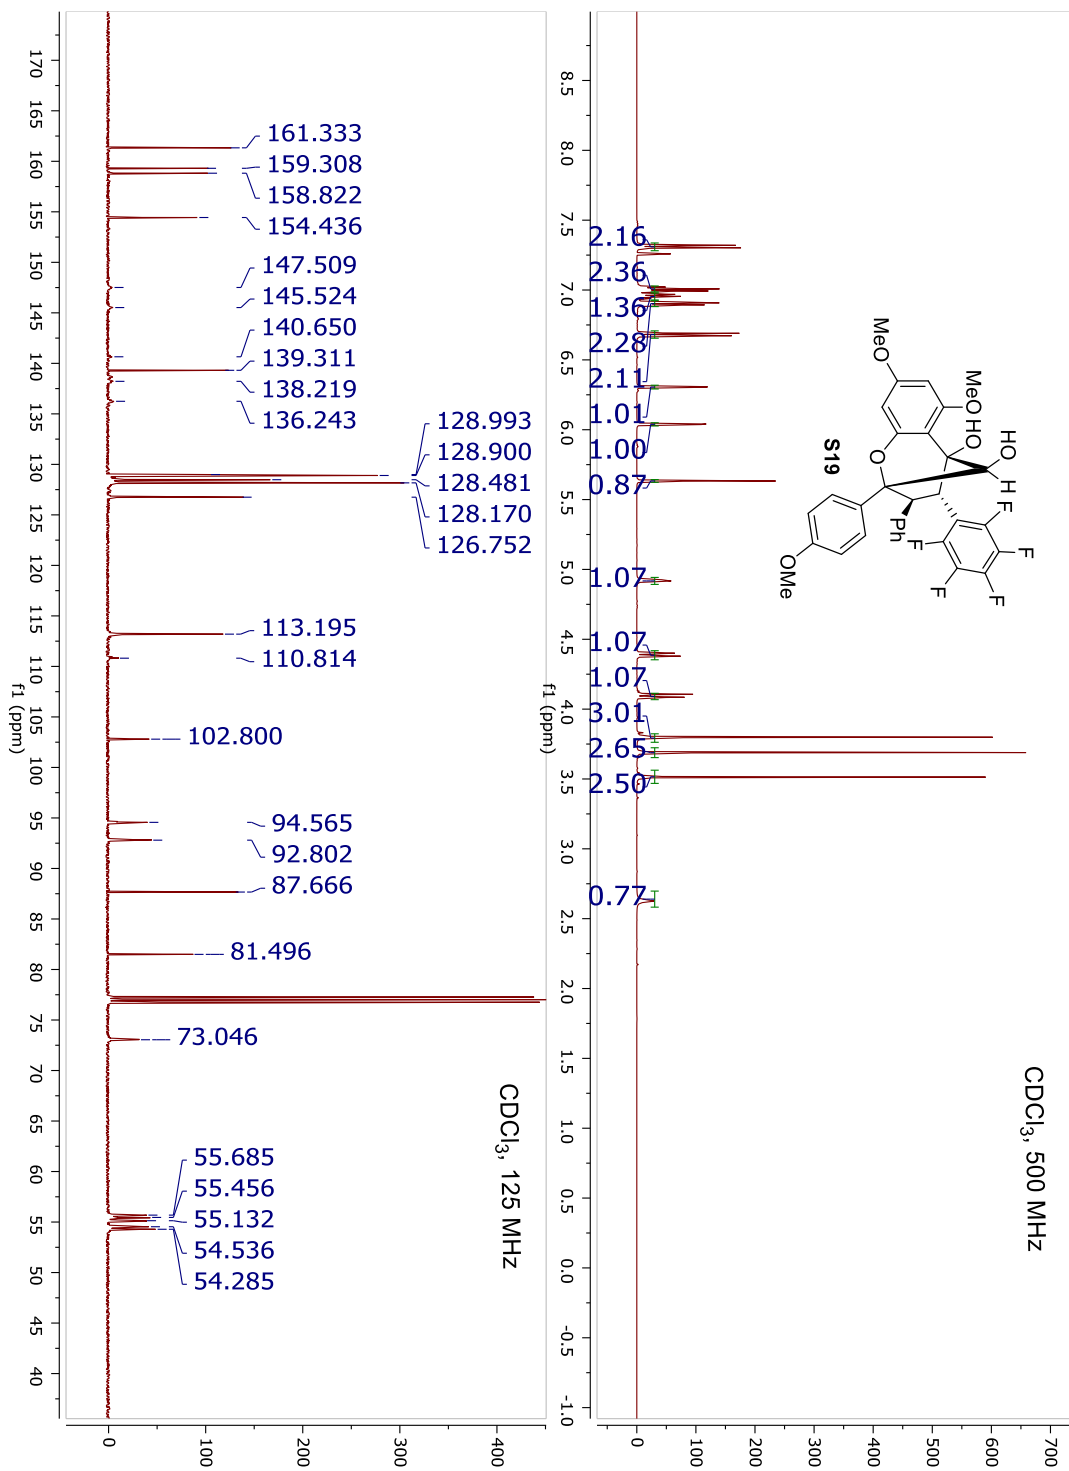

$^{19}\text{F}$  NMR for compound **S19**,  $\text{CDCl}_3$ , 375 MHz.

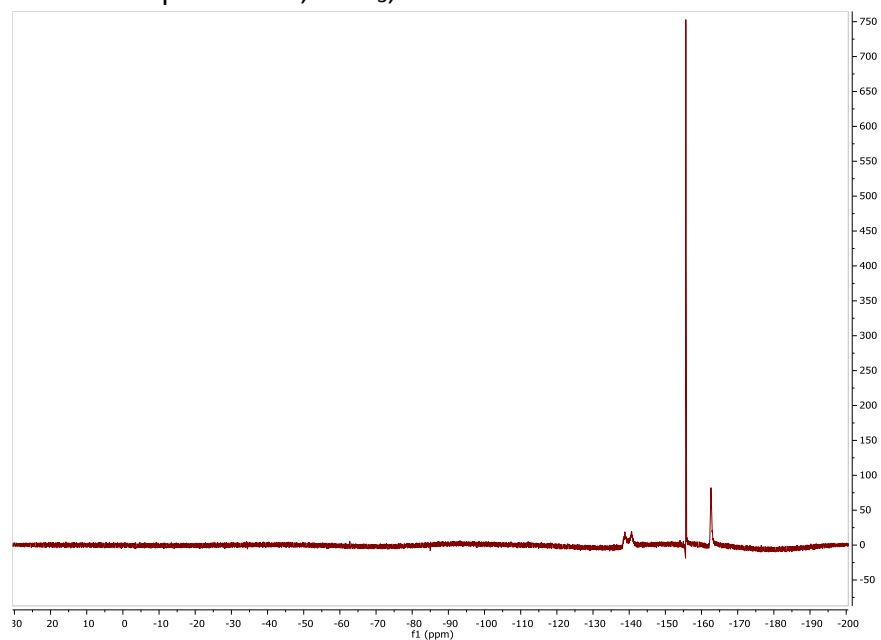

HSQC (compound **S19**):

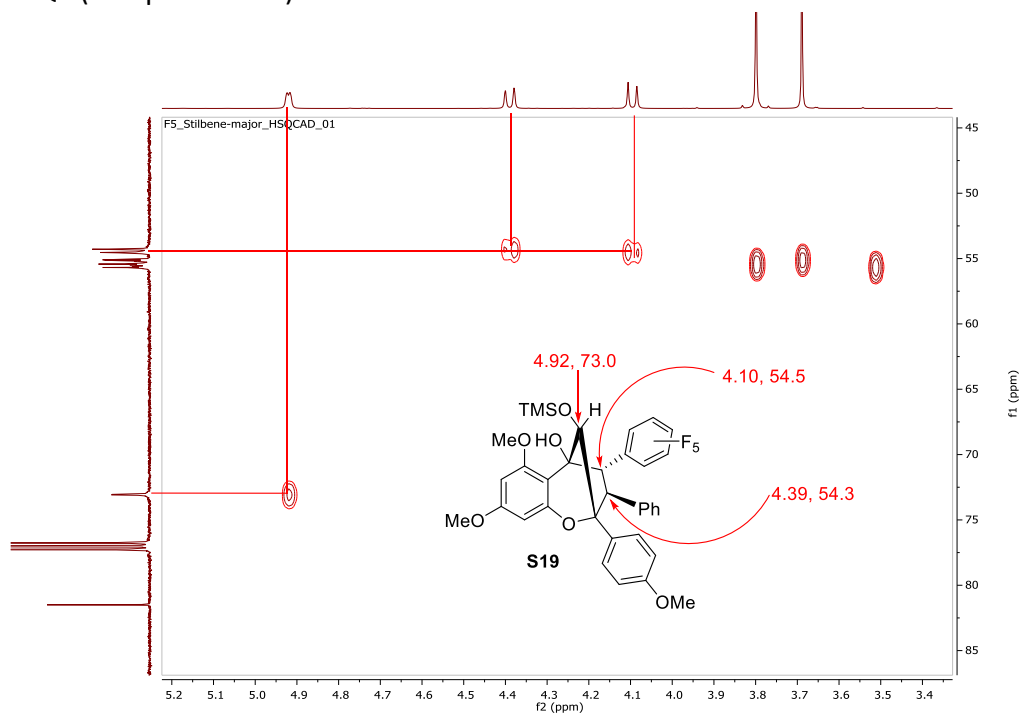

HMBC (compound **S19**):

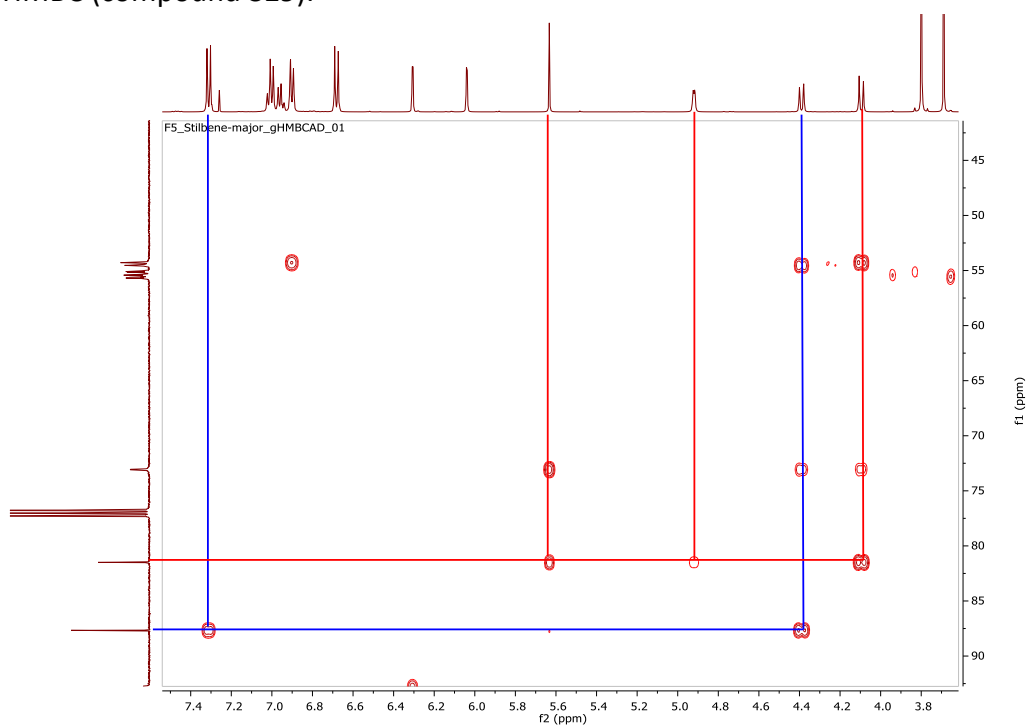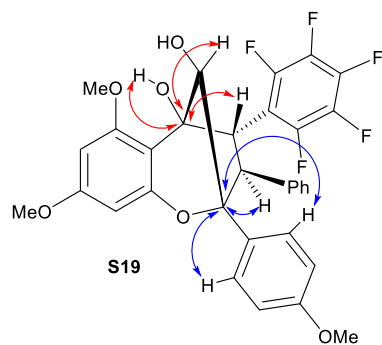

NOESY (compound **S19**):

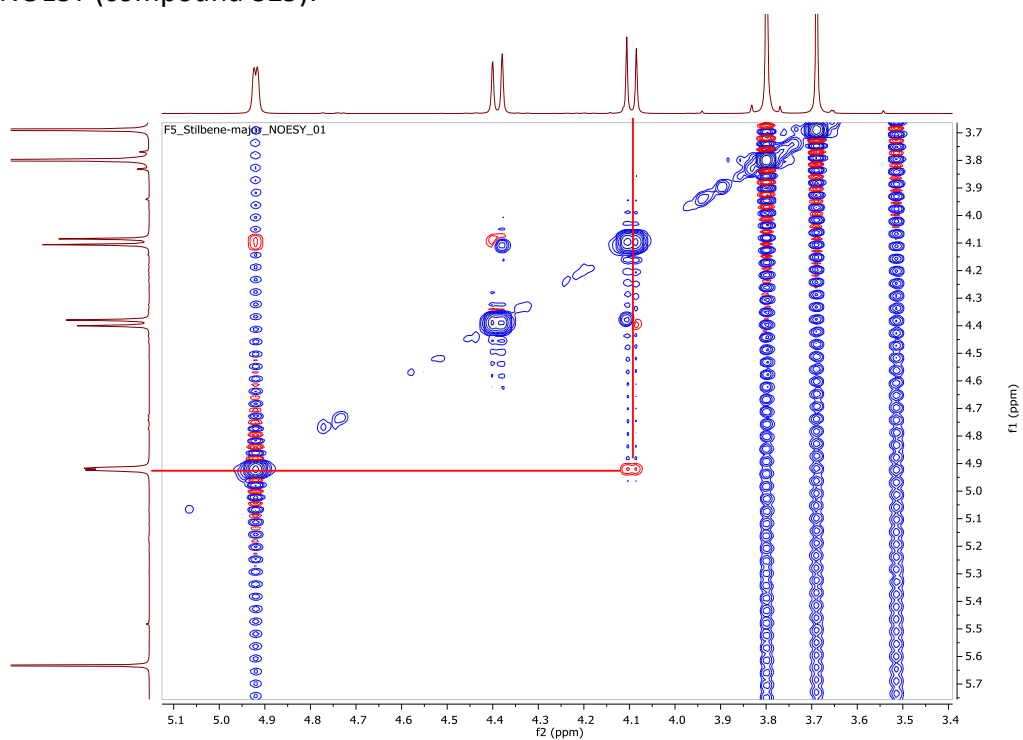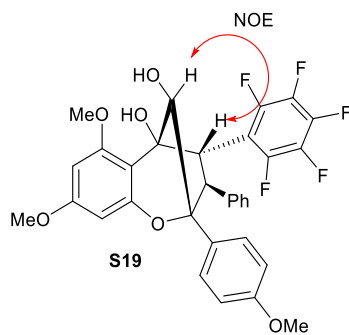

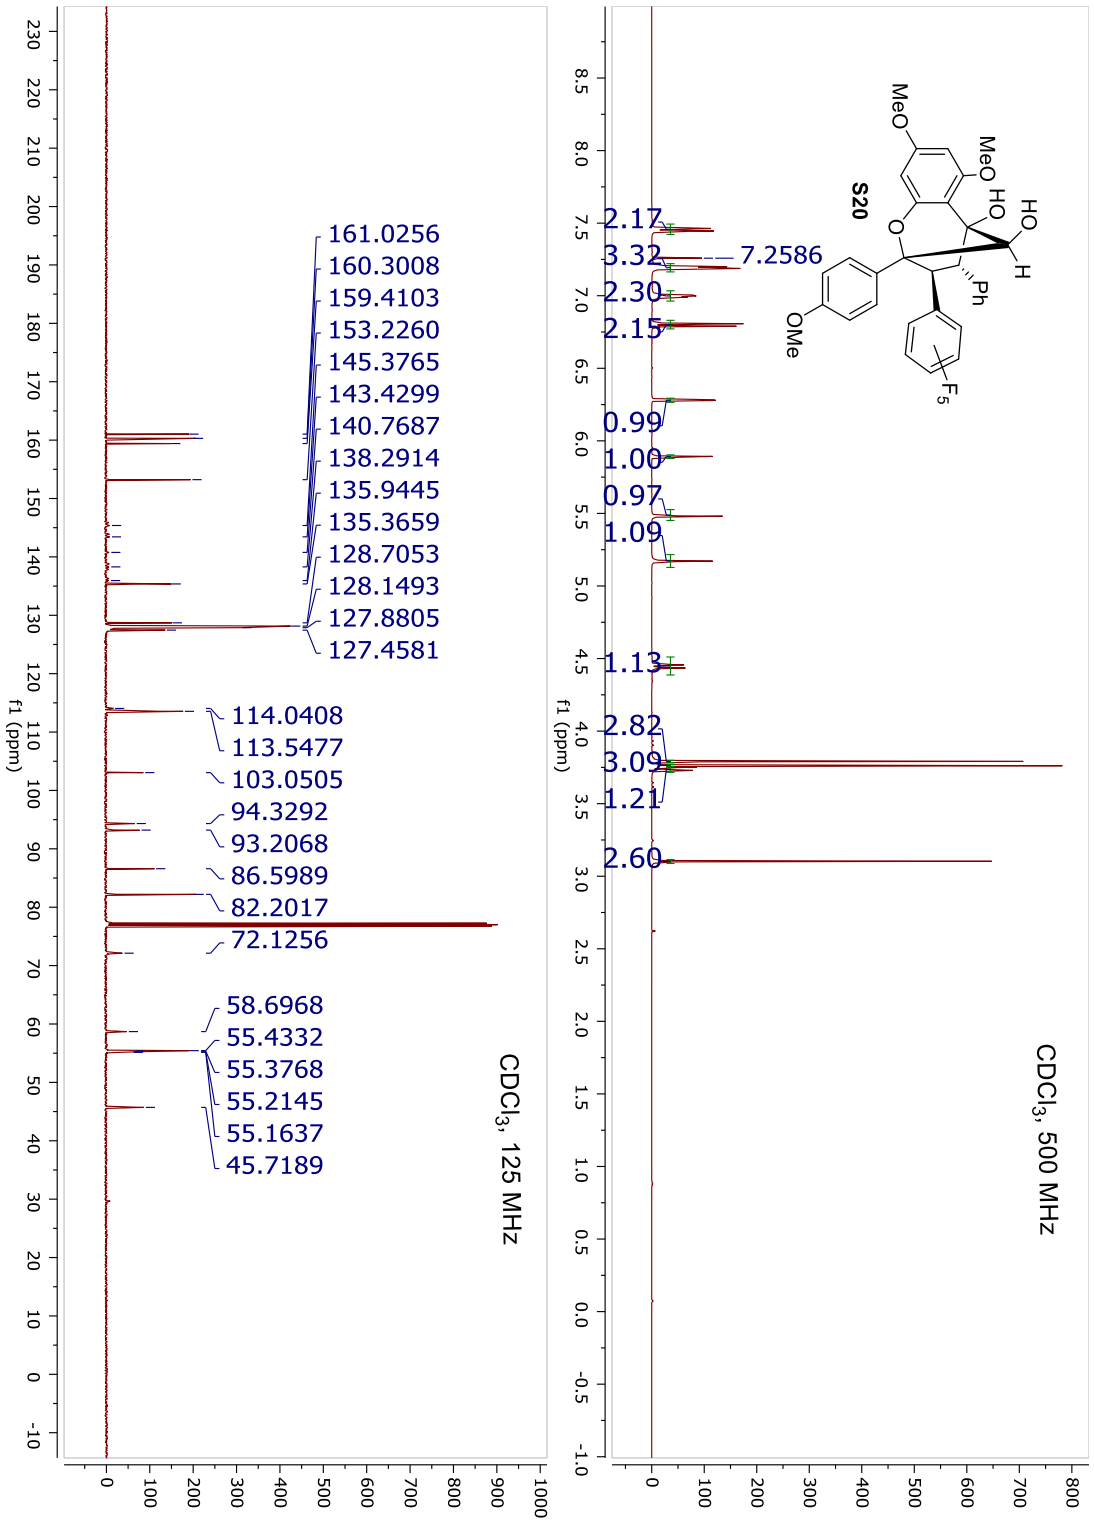



$^{19}\text{F}$  NMR for compound **S20**,  $\text{CDCl}_3$ , 375 MHz.

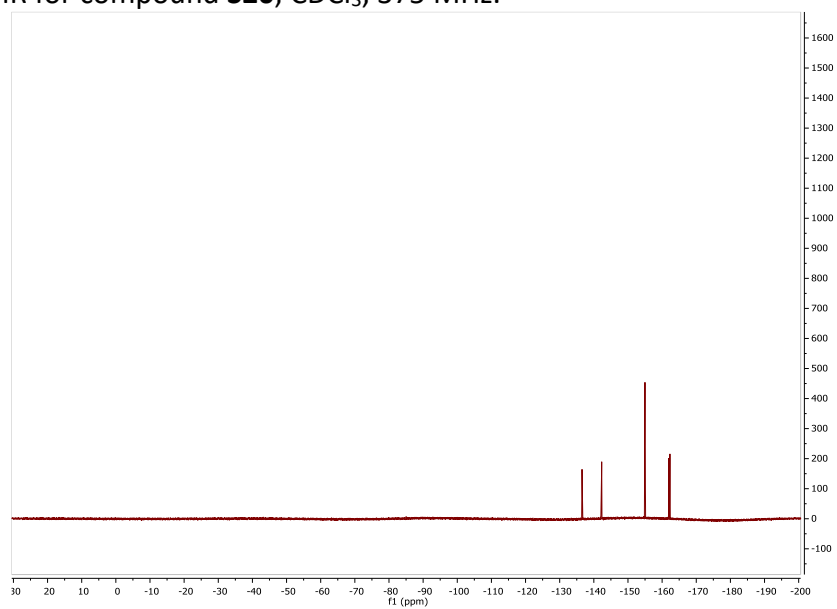

HSQC (compound **S20**):

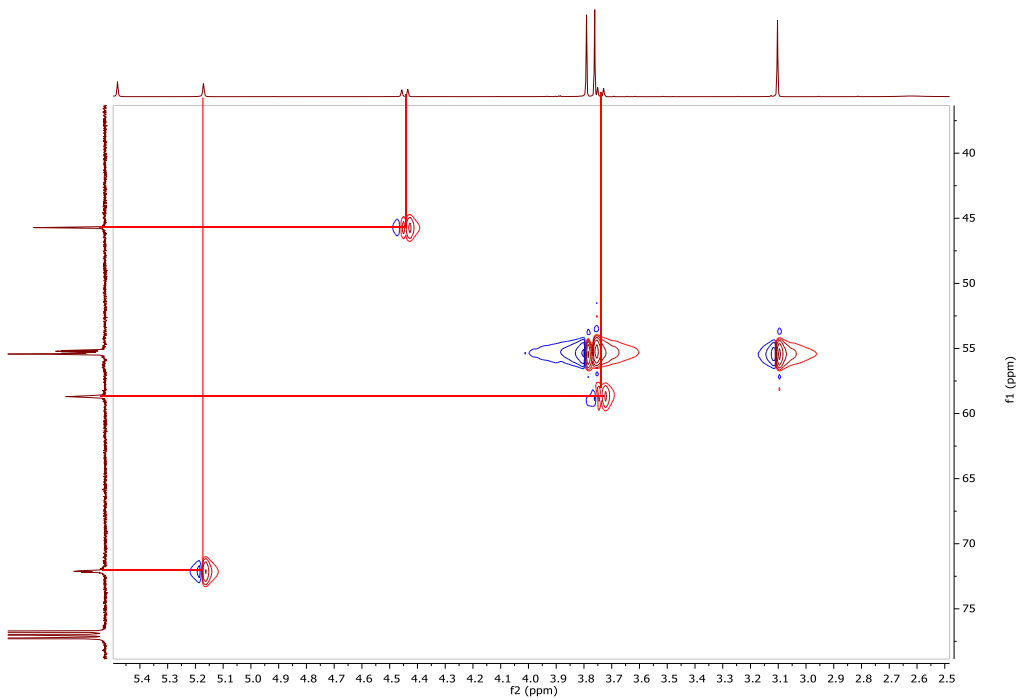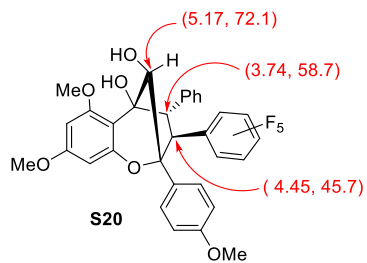

HMBC (compound **S20**):

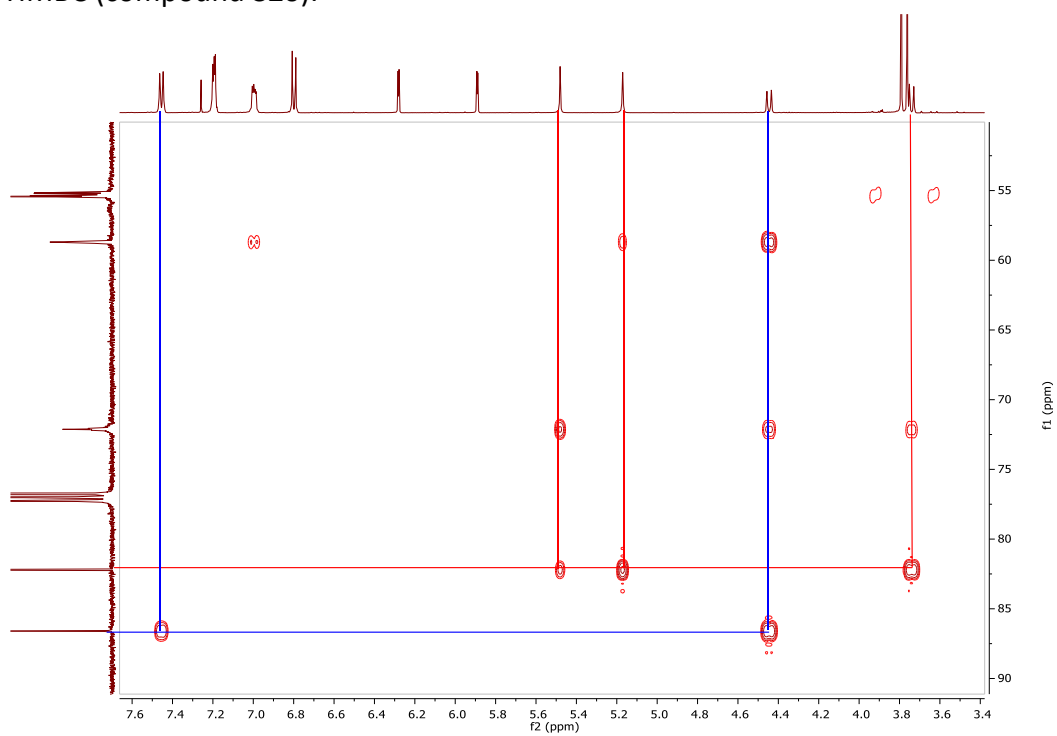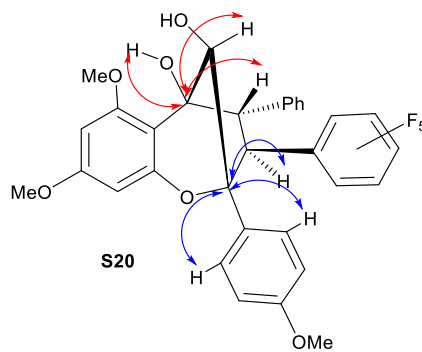

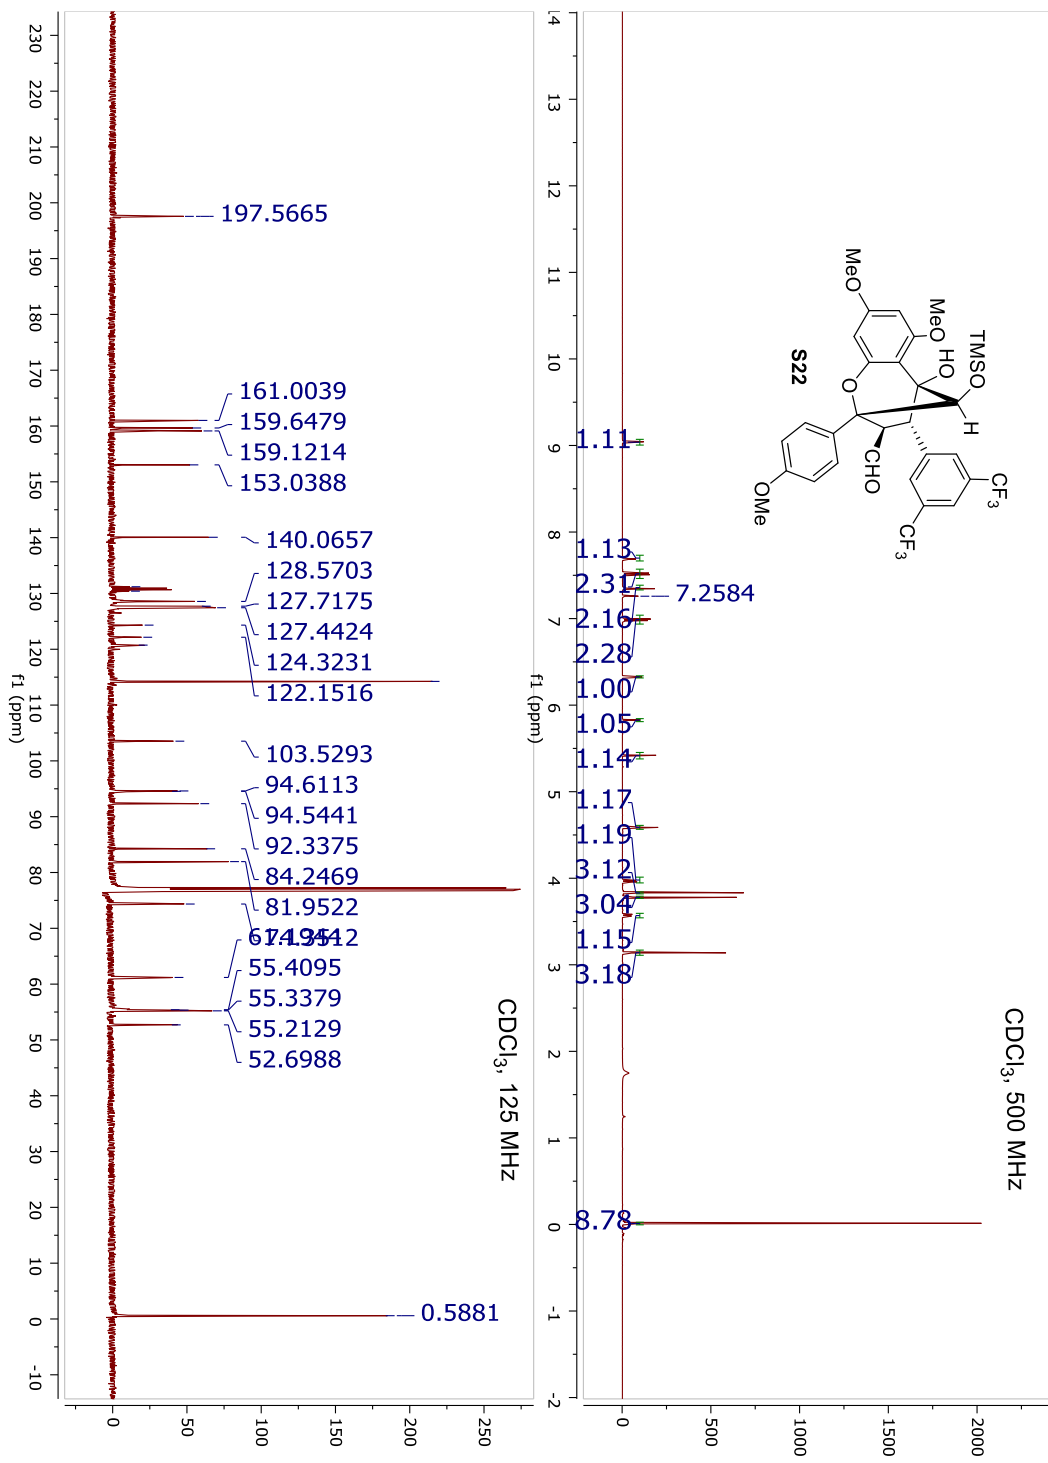

$^{19}\text{F}$  NMR for compound **S22**,  $\text{CDCl}_3$ , 375 MHz.

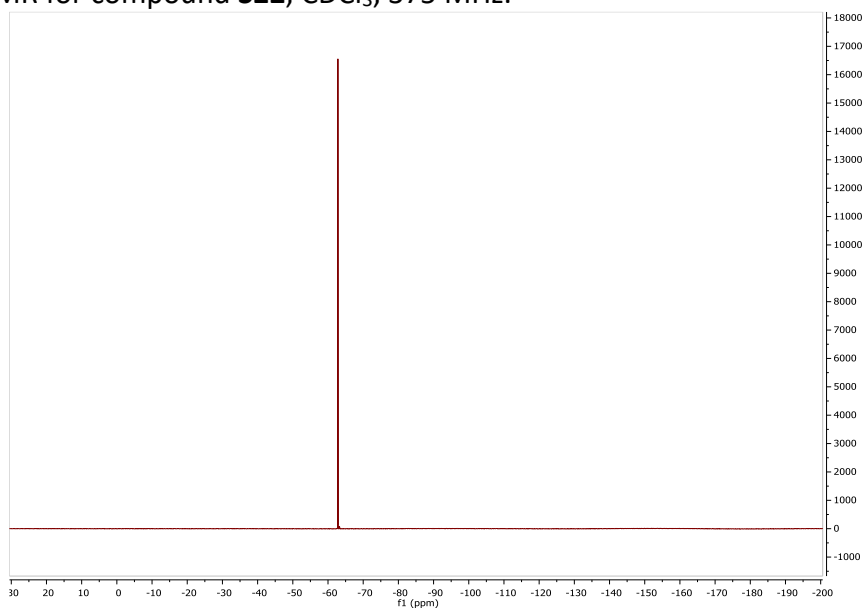

HSQC (compound **S22**):

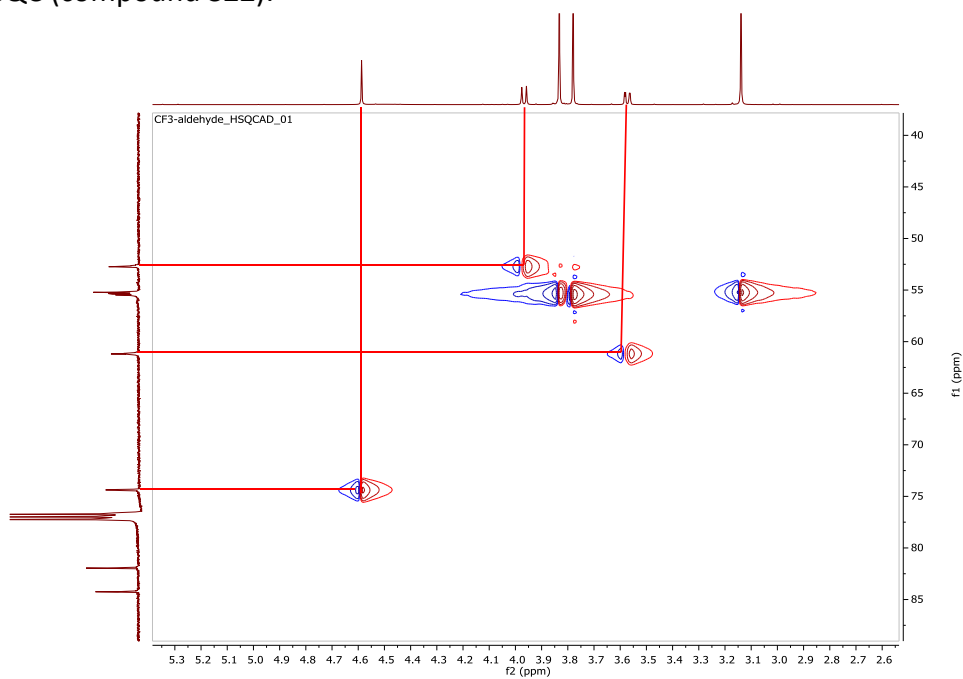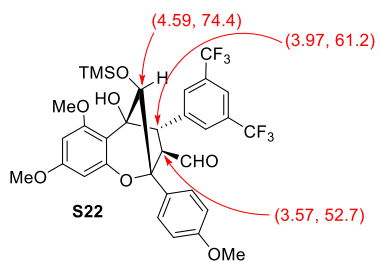

### HMBC (compound S22):

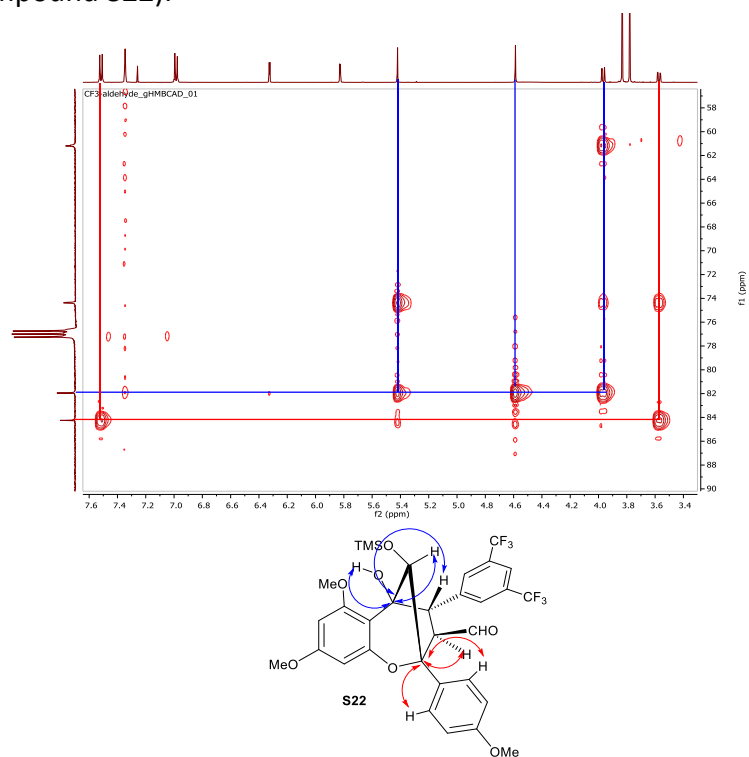

### NOESY (compound S22):

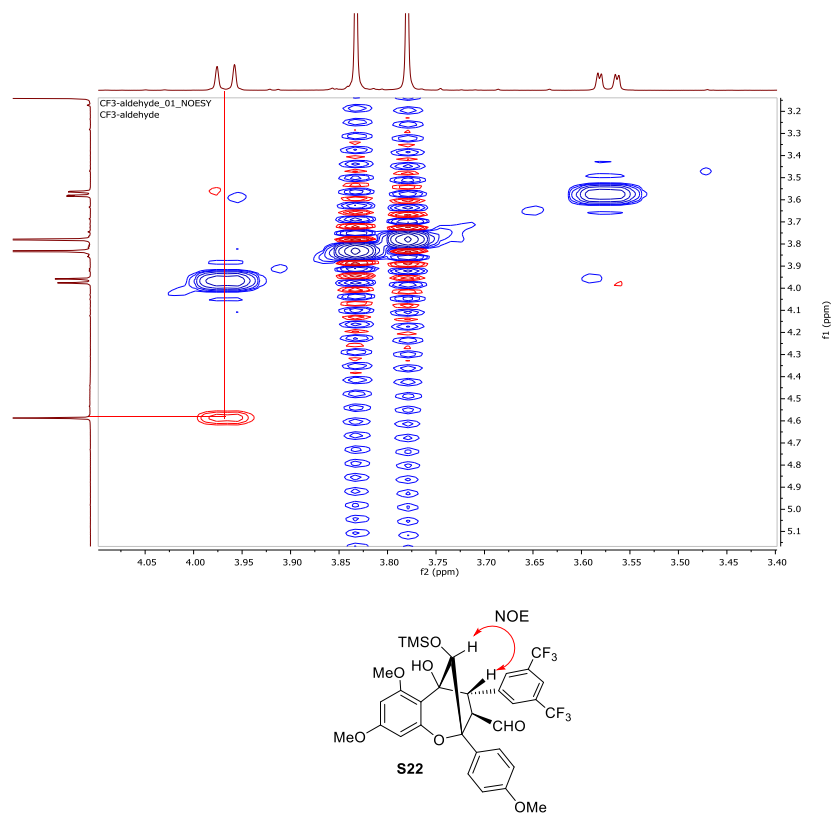

---

**References Cited:**

- <sup>S1</sup> S. K. Verma, B. N. Acharya, M. P. Kaushik, *Org. Lett.*, **2010**, *12*, 4232–4235.
- <sup>S2</sup> A. A. Salim, H. Chai, I. Rachman, S. Riswan, L. B. S. Kardono, N. R. Farnsworth, E. J. Carcache-Blanco, A. D. Kinghorn, *Tetrahedron* **2007**, *63*, 7926-7934.
- <sup>S3</sup> S. E. Denmark, C. S. Regens, T. Kobayashi, *J. Am. Chem. Soc.*, **2007**, *129*, 2774–2776.
- <sup>S4</sup> L. Pan, U. M. Acuña, J. Li, N. Jena, T. N. Ninh, C. M. Pannell, H. Chai, J. R. Fuchs, E. J. Carcache de Blanco, D. D. Soejarto, A. D. Kinghorn, *J. Nat. Prod.* **2013**, *76*, 394-404.
- <sup>S5</sup> D. M. Kuznetsov, O. A. Mukhina, A. G. Kutateladze, *Angew. Chem. Int. Ed.* **2016**, *55*, 6988-6991.
- <sup>S6</sup> A. D. Bochevarov, E. Harder, T. F. Hughes, J. R. Greenwood, D. A. Braden, D. M. Philipp, D. Rinaldo, M. D. Halls, J. Zhang, R. A. Friesner *Int. J. Quantum Chem.* **2013**, *113*, 2110-2142.
- <sup>S7</sup> P. J. Stephens, F. J. Devlin, J. J. Pan, *Chirality*. **2008**, *20*, 643-663.
- <sup>S8</sup> T. Kuppens, P. Bultinck, W. Langenaeker, *Drug Discov Today Technol.* **2004**, *1*, 269-275.
- <sup>S9</sup> M. T. Allen, L. Miota, D. G. Whitten, *J. Am. Chem. Soc.*, **1988**, *110*, 3198-3206.
- <sup>S10</sup> J. Saltiel, O. Dmitrenko, Z. S. Pillai, R. Klima, S. Wang, T. Wharton, Z. -N. Huang, L. J. van de Burgt, J. Arranz, *Photochem. Photobiol. Sci.*, **2008**, *7*, 566–577.
- <sup>S11</sup> a) D. Rehm, A. Weller, *Isr. J. Chem.* **1970**, *8*, 259 – 271; b) D. Rehm, A. Weller, Ber. Bunsenges. *Phys. Chem.* **1969**, *73*, 834 – 839.
- <sup>S12</sup> a) Itoh, M.; Tanimoto, Y.; Tokumura, K. *J. Am. Chem. Soc.* **1983**, *105*, 3339-3340. b) Itoh, M.; Fujiwara, Y.; Su-mitani, M.; Yoshihara, K. *J. Phys. Chem.* **1986**, *90*, 5672-5678. c) Brewer, W. E.; Studer, S. L.; Standiford, M.; Chou, P-T. *J. Phys. Chem.* **1989**, *93*, 6088-6094. d) Toku-mura, K.; Yagata, N.; Fujiwara, Y.; Itoh, M. *J. Phys. Chem.* **1993**, *97*, 6656-6663.
- <sup>S13</sup> J. F. Hulvat, M. Sofos, K. Tajima, S. I. Stupp, *J. Am. Chem. Soc.* **2005**, *127*, 366-372.
- <sup>S14</sup> J. J. Heynekamp, W. M. Weber, L. A. Hunsaker, A. M. Gonzales, R. A. Orlando, L. M. Deck, D. L. V. Jagt, *J. Med. Chem.* **2006**, *49*, 7182-7189.
- <sup>S15</sup> R. Shang, Y. Fu, Y. Wang, Q. Xu, H. -Z. Yu, L. Liu, *Angew. Chem. Int. Ed.* **2009**, *48*, 9350–9354.
- <sup>S16</sup> S. Zhu, Y. Liao, S. Zhu, *Org. Lett.* **2004**, *6*, 377-380.
- <sup>S17</sup> M. Lemhadri, A. Battace, F. Berthiol, T. Zair, H. Doucet, M. Santelli, *Synthesis*, **2008**, *7*, 1142-1152.
- <sup>S18</sup> Y. Shen, T. Wang, *J. Fluorine Chem.* **1994**, *67*, 33-35.
